# Supplementary material
Source: publisher site journal article supplement (http://www.spandidos-publications.com/3951/downloadSupplementary)
Supplement: Supplementary file 1 [file downloadSupplementary]

## Sheet: Table_S2
Table SIV. Swiss-Prot and Pfam database annotation results.
Unigene	Transcript	Subject	Identity (%)	E-value
TRINITY_DN3917_c0_g1	TRINITY_DN3917_c0_g1_i7	SYNE1_MOUSE	87.5	0
TRINITY_DN1392_c0_g1	TRINITY_DN1392_c0_g1_i3	MACF1_MOUSE	86.5	0
TRINITY_DN1392_c0_g2	TRINITY_DN1392_c0_g2_i2	DYST_MOUSE	81.7	0
TRINITY_DN119_c0_g1	TRINITY_DN119_c0_g1_i14	SYNE2_MOUSE	79.6	0
TRINITY_DN3965_c0_g1	TRINITY_DN3965_c0_g1_i8	HMCN1_HUMAN	87.3	0
TRINITY_DN2398_c0_g1	TRINITY_DN2398_c0_g1_i14	HERC2_MOUSE	98.2	0
TRINITY_DN1808_c3_g1	TRINITY_DN1808_c3_g1_i13	UBR4_MOUSE	98.3	0
TRINITY_DN11083_c0_g1	TRINITY_DN11083_c0_g1_i1	FAT4_MOUSE	95.9	0
TRINITY_DN2206_c0_g2	TRINITY_DN2206_c0_g2_i4	DYHC1_MOUSE	99.2	0
TRINITY_DN4188_c0_g1	TRINITY_DN4188_c0_g1_i23	K1109_MOUSE	95.8	0
TRINITY_DN13127_c0_g1	TRINITY_DN13127_c0_g1_i1	SACS_MOUSE	96.9	0
TRINITY_DN4224_c0_g4	TRINITY_DN4224_c0_g4_i18	MYCB2_MOUSE	97.1	0
TRINITY_DN6361_c0_g1	TRINITY_DN6361_c0_g1_i10	HERC1_HUMAN	88.7	0
TRINITY_DN4856_c0_g2	TRINITY_DN4856_c0_g2_i6	BIRC6_MOUSE	97.2	0
TRINITY_DN1894_c0_g1	TRINITY_DN1894_c0_g1_i5	MDN1_HUMAN	81.7	0
TRINITY_DN25220_c0_g1	TRINITY_DN25220_c0_g1_i10	DYH5_MOUSE	93.4	0
TRINITY_DN6737_c0_g1	TRINITY_DN6737_c0_g1_i15	RYR2_MOUSE	88	0
TRINITY_DN2689_c0_g1	TRINITY_DN2689_c0_g1_i20	RYR3_MOUSE	90.4	0
TRINITY_DN7300_c0_g1	TRINITY_DN7300_c0_g1_i33	DYH2_MOUSE	94.2	0
TRINITY_DN1440_c0_g1	TRINITY_DN1440_c0_g1_i7	HMCN2_MOUSE	83.6	0
TRINITY_DN3011_c0_g1	TRINITY_DN3011_c0_g1_i10	RN213_MOUSE	78.2	0
TRINITY_DN2582_c0_g1	TRINITY_DN2582_c0_g1_i1	VP13D_HUMAN	92.4	0
TRINITY_DN6022_c0_g1	TRINITY_DN6022_c0_g1_i1	FAT1_HUMAN	88.2	0
TRINITY_DN1705_c0_g4	TRINITY_DN1705_c0_g4_i4	DYH9_HUMAN	87.1	0
TRINITY_DN622_c2_g1	TRINITY_DN622_c2_g1_i4	PKHL1_MOUSE	88.1	0
TRINITY_DN5036_c0_g1	TRINITY_DN5036_c0_g1_i5	DYH8_MOUSE	84.1	0
TRINITY_DN4717_c0_g1	TRINITY_DN4717_c0_g1_i2	DYH7_RAT	93.8	0
TRINITY_DN2585_c2_g1	TRINITY_DN2585_c2_g1_i1	DYH6_HUMAN	88.8	0
TRINITY_DN344_c1_g1	TRINITY_DN344_c1_g1_i6	TRRAP_HUMAN	98	0
TRINITY_DN2161_c0_g2	TRINITY_DN2161_c0_g2_i2	DYH3_MOUSE	90	0
TRINITY_DN1077_c1_g1	TRINITY_DN1077_c1_g1_i6	HECD4_HUMAN	95.7	0
TRINITY_DN8792_c0_g1	TRINITY_DN8792_c0_g1_i5	PRKDC_MOUSE	87.6	0
TRINITY_DN1328_c5_g2	TRINITY_DN1328_c5_g2_i2	SMG1_MOUSE	99.4	0
TRINITY_DN1328_c5_g1	TRINITY_DN1328_c5_g1_i9	SMG1_MOUSE	99.3	0
TRINITY_DN2711_c0_g1	TRINITY_DN2711_c0_g1_i15	VP13B_MOUSE	88.5	0
TRINITY_DN27903_c0_g2	TRINITY_DN27903_c0_g2_i2	RELN_MOUSE	95.6	0
TRINITY_DN6575_c0_g1	TRINITY_DN6575_c0_g1_i7	LYST_MOUSE	91.5	0
TRINITY_DN9631_c0_g2	TRINITY_DN9631_c0_g2_i7	OBSCN_MOUSE	81.1	0
TRINITY_DN9446_c0_g1	TRINITY_DN9446_c0_g1_i2	APOB_MOUSE	79.9	0
TRINITY_DN1060_c0_g1	TRINITY_DN1060_c0_g1_i10	WDFY3_MOUSE	96.6	0
TRINITY_DN1045_c0_g1	TRINITY_DN1045_c0_g1_i2	PGBM_HUMAN	79	0
TRINITY_DN12811_c0_g1	TRINITY_DN12811_c0_g1_i6	VP13C_MOUSE	91.5	0
TRINITY_DN4253_c2_g1	TRINITY_DN4253_c2_g1_i2	FRAS1_MOUSE	89.3	0
TRINITY_DN19686_c0_g1	TRINITY_DN19686_c0_g1_i4	GPR98_MOUSE	76.4	0
TRINITY_DN1705_c0_g2	TRINITY_DN1705_c0_g2_i6	DYH11_HUMAN	81.6	0
TRINITY_DN8213_c0_g1	TRINITY_DN8213_c0_g1_i21	SVEP1_MOUSE	90.4	0
TRINITY_DN7832_c0_g1	TRINITY_DN7832_c0_g1_i26	SSPO_RAT	81.4	0
TRINITY_DN162_c0_g1	TRINITY_DN162_c0_g1_i10	UBP34_HUMAN	97.5	0
TRINITY_DN1311_c1_g1	TRINITY_DN1311_c1_g1_i1	LRP1_MOUSE	98.8	0
TRINITY_DN2285_c0_g1	TRINITY_DN2285_c0_g1_i4	PCD16_MOUSE	95.4	0
TRINITY_DN13_c2_g1	TRINITY_DN13_c2_g1_i4	KMT2A_MOUSE	92.3	0
TRINITY_DN1622_c0_g1	TRINITY_DN1622_c0_g1_i7	DYH1_RAT	67.1	0
TRINITY_DN7056_c0_g2	TRINITY_DN7056_c0_g2_i17	CUBN_MOUSE	80.1	0
TRINITY_DN76483_c0_g1	TRINITY_DN76483_c0_g1_i1	FREM2_MOUSE	92.1	0
TRINITY_DN1566_c0_g1	TRINITY_DN1566_c0_g1_i4	SZT2_MOUSE	65.4	0
TRINITY_DN802_c0_g1	TRINITY_DN802_c0_g1_i3	PKD1_MOUSE	91.6	0
TRINITY_DN5099_c0_g1	TRINITY_DN5099_c0_g1_i14	STAR9_MOUSE	70.1	0
TRINITY_DN10904_c0_g1	TRINITY_DN10904_c0_g1_i19	FRY_MOUSE	97.5	0
TRINITY_DN17501_c0_g1	TRINITY_DN17501_c0_g1_i1	PKHD1_HUMAN	72.9	0
TRINITY_DN205_c2_g1	TRINITY_DN205_c2_g1_i6	DMD_RAT	92.9	0
TRINITY_DN6403_c0_g1	TRINITY_DN6403_c0_g1_i6	UTRO_HUMAN	86.9	0
TRINITY_DN1427_c0_g1	TRINITY_DN1427_c0_g1_i17	FRYL_HUMAN	93.8	0
TRINITY_DN2370_c1_g1	TRINITY_DN2370_c1_g1_i5	NBEA_MOUSE	98.7	0
TRINITY_DN12898_c1_g1	TRINITY_DN12898_c1_g1_i1	ZFHX4_MOUSE	89.7	0
TRINITY_DN2598_c2_g1	TRINITY_DN2598_c2_g1_i3	VP13A_MOUSE	89.4	0
TRINITY_DN3115_c0_g1	TRINITY_DN3115_c0_g1_i11	NF1_HUMAN	98.6	0
TRINITY_DN12821_c0_g1	TRINITY_DN12821_c0_g1_i5	FLNC_MOUSE	99.3	0
TRINITY_DN6534_c0_g1	TRINITY_DN6534_c0_g1_i1	DPOLZ_MOUSE	90.1	0
TRINITY_DN1880_c2_g1	TRINITY_DN1880_c2_g1_i3	LRP2_MOUSE	84.6	0
TRINITY_DN1396_c2_g1	TRINITY_DN1396_c2_g1_i6	LAMA3_MOUSE	83.7	0
TRINITY_DN4378_c0_g1	TRINITY_DN4378_c0_g1_i5	ATM_MOUSE	89.3	0
TRINITY_DN2323_c0_g1	TRINITY_DN2323_c0_g1_i12	DMXL2_MOUSE	93.6	0
TRINITY_DN6406_c0_g1	TRINITY_DN6406_c0_g1_i17	TRIO_MOUSE	98.7	0
TRINITY_DN6791_c0_g1	TRINITY_DN6791_c0_g1_i10	RBP2_MOUSE	89	0
TRINITY_DN964_c0_g1	TRINITY_DN964_c0_g1_i13	CELR2_MOUSE	95.3	0
TRINITY_DN52509_c1_g2	TRINITY_DN52509_c1_g2_i2	TRNK1_MOUSE	90.4	0
TRINITY_DN3399_c1_g1	TRINITY_DN3399_c1_g1_i8	ZZEF1_MOUSE	93.3	0
TRINITY_DN2570_c1_g1	TRINITY_DN2570_c1_g1_i16	DYH12_MOUSE	71	0
TRINITY_DN108812_c0_g1	TRINITY_DN108812_c0_g1_i1	FAT2_MOUSE	91.9	0
TRINITY_DN1733_c0_g1	TRINITY_DN1733_c0_g1_i6	COCA1_MOUSE	95.8	0
TRINITY_DN3250_c0_g1	TRINITY_DN3250_c0_g1_i1	ITPR1_MOUSE	98	0
TRINITY_DN53150_c0_g2	TRINITY_DN53150_c0_g2_i8	WDFY4_HUMAN	81.9	0
TRINITY_DN1973_c0_g2	TRINITY_DN1973_c0_g2_i1	ITPR2_MOUSE	97.1	0
TRINITY_DN5057_c1_g3	TRINITY_DN5057_c1_g3_i7	LRBA_MOUSE	92.4	0
TRINITY_DN1604_c0_g1	TRINITY_DN1604_c0_g1_i11	DYHC2_MOUSE	96	0
TRINITY_DN336_c2_g1	TRINITY_DN336_c2_g1_i8	TEN4_MOUSE	96.7	0
TRINITY_DN2894_c0_g1	TRINITY_DN2894_c0_g1_i15	ATR_MOUSE	95.3	0
TRINITY_DN1068_c1_g2	TRINITY_DN1068_c1_g2_i3	USP9X_MOUSE	99	0
TRINITY_DN2199_c1_g1	TRINITY_DN2199_c1_g1_i1	TEN3_MOUSE	97	0
TRINITY_DN301_c0_g1	TRINITY_DN301_c0_g1_i4	CELR1_MOUSE	81.3	0
TRINITY_DN3253_c1_g1	TRINITY_DN3253_c1_g1_i2	LAMA2_MOUSE	88.9	0
TRINITY_DN36523_c0_g1	TRINITY_DN36523_c0_g1_i2	CFA54_MOUSE	79.1	0
TRINITY_DN17255_c0_g1	TRINITY_DN17255_c0_g1_i9	HELZ2_MOUSE	83.4	0
TRINITY_DN257_c1_g1	TRINITY_DN257_c1_g1_i1	HECD1_HUMAN	99	0
TRINITY_DN2108_c0_g1	TRINITY_DN2108_c0_g1_i21	FLNB_MOUSE	72.3	0
TRINITY_DN704_c0_g1	TRINITY_DN704_c0_g1_i17	PRP8_MOUSE	100	0
TRINITY_DN942_c4_g1	TRINITY_DN942_c4_g1_i1	UTP20_MOUSE	90	0
TRINITY_DN3817_c0_g1	TRINITY_DN3817_c0_g1_i2	PIEZ2_MOUSE	94.9	0
TRINITY_DN471_c0_g1	TRINITY_DN471_c0_g1_i12	LAMA5_MOUSE	86.6	0
TRINITY_DN7984_c0_g1	TRINITY_DN7984_c0_g1_i15	CHD6_MOUSE	91.3	0
TRINITY_DN1048_c0_g1	TRINITY_DN1048_c0_g1_i10	GCN1_MOUSE	82.8	0
TRINITY_DN8157_c0_g1	TRINITY_DN8157_c0_g1_i3	HYDIN_MOUSE	89.5	0
TRINITY_DN436_c0_g1	TRINITY_DN436_c0_g1_i1	ACACA_MOUSE	99.1	0
TRINITY_DN1517_c0_g1	TRINITY_DN1517_c0_g1_i1	KMT2D_MOUSE	90	0
TRINITY_DN1402_c0_g1	TRINITY_DN1402_c0_g1_i1	FLNA_MOUSE	74.8	0
TRINITY_DN3173_c0_g2	TRINITY_DN3173_c0_g2_i18	ASH1L_MOUSE	92.7	0
TRINITY_DN3173_c0_g3	TRINITY_DN3173_c0_g3_i4	ASH1L_MOUSE	92.7	0
TRINITY_DN2585_c3_g2	TRINITY_DN2585_c3_g2_i2	DYH10_HUMAN	91.5	0
TRINITY_DN1973_c0_g1	TRINITY_DN1973_c0_g1_i8	ITPR3_RAT	73.6	0
TRINITY_DN2389_c0_g1	TRINITY_DN2389_c0_g1_i21	FAS_MOUSE	91.3	0
TRINITY_DN1608_c0_g2	TRINITY_DN1608_c0_g2_i9	HD_MOUSE	80.1	0
TRINITY_DN3532_c0_g1	TRINITY_DN3532_c0_g1_i8	UBP24_MOUSE	98.8	0
TRINITY_DN2929_c0_g1	TRINITY_DN2929_c0_g1_i17	ABCA2_RAT	96.2	0
TRINITY_DN436_c0_g2	TRINITY_DN436_c0_g2_i7	ACACB_MOUSE	93	0
TRINITY_DN582_c0_g2	TRINITY_DN582_c0_g2_i10	MPRI_MOUSE	87.8	0
TRINITY_DN6406_c0_g2	TRINITY_DN6406_c0_g2_i4	KALRN_RAT	96.5	0
TRINITY_DN4277_c1_g1	TRINITY_DN4277_c1_g1_i5	MYO9A_RAT	91.3	0
TRINITY_DN3277_c2_g1	TRINITY_DN3277_c2_g1_i6	MGAP_MOUSE	85.1	0
TRINITY_DN3544_c0_g1	TRINITY_DN3544_c0_g1_i3	PRUN2_MOUSE	77.3	0
TRINITY_DN1253_c0_g1	TRINITY_DN1253_c0_g1_i2	HUWE1_MOUSE	97.2	0
TRINITY_DN301_c1_g1	TRINITY_DN301_c1_g1_i12	CNOT1_MOUSE	91.7	0
TRINITY_DN374_c0_g1	TRINITY_DN374_c0_g1_i15	NBEL1_HUMAN	88.5	0
TRINITY_DN4463_c0_g2	TRINITY_DN4463_c0_g2_i1	SPTB2_MOUSE	98.9	0
TRINITY_DN525_c1_g1	TRINITY_DN525_c1_g1_i1	DMXL1_MOUSE	91.4	0
TRINITY_DN1697_c0_g2	TRINITY_DN1697_c0_g2_i5	APC_MOUSE	89.6	0
TRINITY_DN81_c1_g1	TRINITY_DN81_c1_g1_i2	DOP1_HUMAN	93.1	0
TRINITY_DN3724_c1_g1	TRINITY_DN3724_c1_g1_i5	ZFY26_MOUSE	87.9	0
TRINITY_DN326_c0_g1	TRINITY_DN326_c0_g1_i65	DPOE1_MOUSE	95	0
TRINITY_DN1647_c1_g1	TRINITY_DN1647_c1_g1_i15	NBEL2_MOUSE	91.6	0
TRINITY_DN2438_c1_g1	TRINITY_DN2438_c1_g1_i8	BRCA2_MOUSE	71.2	0
TRINITY_DN2215_c2_g1	TRINITY_DN2215_c2_g1_i2	ZFHX3_HUMAN	90.7	0
TRINITY_DN3448_c0_g2	TRINITY_DN3448_c0_g2_i2	EPG5_MOUSE	87.5	0
TRINITY_DN906_c1_g1	TRINITY_DN906_c1_g1_i27	CHD8_MOUSE	86.8	0
TRINITY_DN4034_c1_g1	TRINITY_DN4034_c1_g1_i3	NIPBL_MOUSE	98	0
TRINITY_DN8044_c0_g3	TRINITY_DN8044_c0_g3_i1	LRRK2_MOUSE	88.1	0
TRINITY_DN2049_c0_g1	TRINITY_DN2049_c0_g1_i14	PYR1_MESAU	86.8	0
TRINITY_DN1342_c0_g2	TRINITY_DN1342_c0_g2_i13	DJC13_HUMAN	96.6	0
TRINITY_DN4152_c1_g1	TRINITY_DN4152_c1_g1_i6	MEGF8_MOUSE	96.7	0
TRINITY_DN5753_c0_g1	TRINITY_DN5753_c0_g1_i6	K0100_MOUSE	97	0
TRINITY_DN23261_c0_g3	TRINITY_DN23261_c0_g3_i2	SDK1_MOUSE	96.5	0
TRINITY_DN966_c0_g1	TRINITY_DN966_c0_g1_i6	MINT_MOUSE	81.8	0
TRINITY_DN508_c4_g1	TRINITY_DN508_c4_g1_i2	SDK2_MOUSE	98.5	0
TRINITY_DN3604_c0_g2	TRINITY_DN3604_c0_g2_i10	ASCC3_MOUSE	94.4	0
TRINITY_DN6329_c0_g1	TRINITY_DN6329_c0_g1_i3	U520_MOUSE	99.9	0
TRINITY_DN14559_c0_g4	TRINITY_DN14559_c0_g4_i2	CSMD2_HUMAN	94.5	0
TRINITY_DN3506_c0_g1	TRINITY_DN3506_c0_g1_i4	ZN292_MOUSE	83.7	0
TRINITY_DN2997_c0_g1	TRINITY_DN2997_c0_g1_i11	KMT2C_MOUSE	69.9	0
TRINITY_DN12225_c0_g1	TRINITY_DN12225_c0_g1_i7	ROS1_RAT	86.2	0
TRINITY_DN7213_c0_g1	TRINITY_DN7213_c0_g1_i6	TLN2_HUMAN	98.3	0
TRINITY_DN15982_c0_g1	TRINITY_DN15982_c0_g1_i2	MAST4_MOUSE	86.7	0
TRINITY_DN3855_c0_g1	TRINITY_DN3855_c0_g1_i1	HYDIN_MOUSE	85.8	0
TRINITY_DN2339_c0_g1	TRINITY_DN2339_c0_g1_i17	SPTN2_RAT	97	0
TRINITY_DN2328_c0_g2	TRINITY_DN2328_c0_g2_i8	CE350_HUMAN	78	0
TRINITY_DN10285_c0_g1	TRINITY_DN10285_c0_g1_i29	CE042_MOUSE	76.1	0
TRINITY_DN4826_c2_g1	TRINITY_DN4826_c2_g1_i4	MED13_MOUSE	95.9	0
TRINITY_DN5_c0_g1	TRINITY_DN5_c0_g1_i14	DYSF_MOUSE	96.2	0
TRINITY_DN13669_c0_g1	TRINITY_DN13669_c0_g1_i2	DOC10_MOUSE	96	0
TRINITY_DN43765_c0_g2	TRINITY_DN43765_c0_g2_i1	DOC11_MOUSE	97.4	0
TRINITY_DN3305_c0_g1	TRINITY_DN3305_c0_g1_i20	FYV1_MOUSE	96.2	0
TRINITY_DN3994_c0_g1	TRINITY_DN3994_c0_g1_i3	DOP2_MOUSE	90.9	0
TRINITY_DN11797_c0_g1	TRINITY_DN11797_c0_g1_i5	PTN13_MOUSE	84.9	0
TRINITY_DN71146_c0_g2	TRINITY_DN71146_c0_g2_i9	BIG3_MOUSE	95.6	0
TRINITY_DN1422_c3_g1	TRINITY_DN1422_c3_g1_i3	DOCK8_MOUSE	96.7	0
TRINITY_DN11192_c0_g1	TRINITY_DN11192_c0_g1_i13	ZN462_HUMAN	92.4	0
TRINITY_DN1242_c0_g1	TRINITY_DN1242_c0_g1_i29	INT1_MOUSE	85.9	0
TRINITY_DN5989_c1_g1	TRINITY_DN5989_c1_g1_i4	JHD2C_HUMAN	83.2	0
TRINITY_DN2590_c0_g1	TRINITY_DN2590_c0_g1_i3	PCX1_MOUSE	91.5	0
TRINITY_DN8328_c2_g2	TRINITY_DN8328_c2_g2_i1	NBAS_HUMAN	85	0
TRINITY_DN7117_c0_g1	TRINITY_DN7117_c0_g1_i5	SPTB1_MOUSE	95.5	0
TRINITY_DN121_c0_g1	TRINITY_DN121_c0_g1_i4	TLN1_MOUSE	87.8	0
TRINITY_DN1238_c0_g1	TRINITY_DN1238_c0_g1_i9	DOCK7_MOUSE	98.4	0
TRINITY_DN3564_c0_g1	TRINITY_DN3564_c0_g1_i17	MD13L_MOUSE	95.2	0
TRINITY_DN259_c0_g1	TRINITY_DN259_c0_g1_i1	CHD9_MOUSE	93.3	0
TRINITY_DN8043_c0_g2	TRINITY_DN8043_c0_g2_i3	ZEP2_RAT	91.8	0
TRINITY_DN23052_c0_g1	TRINITY_DN23052_c0_g1_i6	BSN_MOUSE	90	0
TRINITY_DN14322_c0_g1	TRINITY_DN14322_c0_g1_i2	ZEP1_MOUSE	79.7	0
TRINITY_DN2299_c0_g1	TRINITY_DN2299_c0_g1_i9	VWF_MOUSE	89.5	0
TRINITY_DN9717_c0_g1	TRINITY_DN9717_c0_g1_i7	CFA47_HUMAN	61.3	0
TRINITY_DN6136_c0_g1	TRINITY_DN6136_c0_g1_i4	PLCE1_MOUSE	89.4	0
TRINITY_DN4083_c0_g1	TRINITY_DN4083_c0_g1_i15	DNHD1_HUMAN	53.2	0
TRINITY_DN3337_c0_g1	TRINITY_DN3337_c0_g1_i25	CABIN_RAT	92.8	0
TRINITY_DN4095_c0_g1	TRINITY_DN4095_c0_g1_i9	RTTN_MOUSE	89.4	0
TRINITY_DN6988_c0_g1	TRINITY_DN6988_c0_g1_i2	EMAL6_HUMAN	97.2	0
TRINITY_DN3276_c0_g1	TRINITY_DN3276_c0_g1_i1	FINC_HUMAN	89	0
TRINITY_DN270_c0_g2	TRINITY_DN270_c0_g2_i7	ATG2B_MOUSE	94.5	0
TRINITY_DN5603_c0_g1	TRINITY_DN5603_c0_g1_i6	PDZD2_RAT	75.5	0
TRINITY_DN77_c0_g1	TRINITY_DN77_c0_g1_i7	PIEZ1_MOUSE	91.1	0
TRINITY_DN3863_c0_g1	TRINITY_DN3863_c0_g1_i3	NAV2_HUMAN	88.3	0
TRINITY_DN1178_c0_g1	TRINITY_DN1178_c0_g1_i3	TNC18_MOUSE	88.4	0
TRINITY_DN939_c1_g1	TRINITY_DN939_c1_g1_i6	FREM1_MOUSE	85	0
TRINITY_DN55564_c0_g1	TRINITY_DN55564_c0_g1_i24	DPOLQ_MOUSE	78.9	0
TRINITY_DN1271_c0_g1	TRINITY_DN1271_c0_g1_i7	SPTN1_RAT	68.7	0
TRINITY_DN2083_c1_g1	TRINITY_DN2083_c1_g1_i8	PTPRD_MOUSE	98	0
TRINITY_DN2260_c0_g1	TRINITY_DN2260_c0_g1_i13	NU205_HUMAN	95.3	0
TRINITY_DN5031_c1_g1	TRINITY_DN5031_c1_g1_i4	SETD2_MOUSE	86	0
TRINITY_DN5407_c0_g1	TRINITY_DN5407_c0_g1_i10	KNTC1_MOUSE	87.1	0
TRINITY_DN3553_c0_g3	TRINITY_DN3553_c0_g3_i1	PLXA2_MOUSE	98.4	0
TRINITY_DN5760_c1_g1	TRINITY_DN5760_c1_g1_i2	SMHD1_MOUSE	91.1	0
TRINITY_DN3633_c0_g2	TRINITY_DN3633_c0_g2_i13	CAC1D_MOUSE	94.6	0
TRINITY_DN5091_c0_g1	TRINITY_DN5091_c0_g1_i1	ATS9_HUMAN	88.9	0
TRINITY_DN10837_c0_g1	TRINITY_DN10837_c0_g1_i2	LRRK1_MOUSE	94.1	0
TRINITY_DN4560_c0_g1	TRINITY_DN4560_c0_g1_i7	HTR5B_MOUSE	95.9	0
TRINITY_DN788_c1_g1	TRINITY_DN788_c1_g1_i8	APC1_MOUSE	95	0
TRINITY_DN4128_c0_g1	TRINITY_DN4128_c0_g1_i2	PTPRF_MOUSE	98.2	0
TRINITY_DN42844_c0_g1	TRINITY_DN42844_c0_g1_i4	FAT3_RAT	95.2	0
TRINITY_DN2741_c2_g1	TRINITY_DN2741_c2_g1_i7	PTPRB_MOUSE	90.4	0
TRINITY_DN52_c0_g2	TRINITY_DN52_c0_g2_i11	NSD1_HUMAN	85.6	0
TRINITY_DN1825_c0_g2	TRINITY_DN1825_c0_g2_i13	CKAP5_MOUSE	95.3	0
TRINITY_DN394_c3_g1	TRINITY_DN394_c3_g1_i5	EP400_MOUSE	89.9	0
TRINITY_DN3217_c0_g1	TRINITY_DN3217_c0_g1_i8	RGPA1_RAT	79.1	0
TRINITY_DN7570_c0_g1	TRINITY_DN7570_c0_g1_i7	ZEP3_MOUSE	86	0
TRINITY_DN1364_c0_g1	TRINITY_DN1364_c0_g1_i12	RHG32_MOUSE	92.9	0
TRINITY_DN26585_c0_g1	TRINITY_DN26585_c0_g1_i18	MD12L_MOUSE	95.9	0
TRINITY_DN755_c0_g2	TRINITY_DN755_c0_g2_i15	PSME4_MOUSE	97.7	0
TRINITY_DN746_c0_g1	TRINITY_DN746_c0_g1_i1	NCOR1_MOUSE	92	0
TRINITY_DN2804_c0_g2	TRINITY_DN2804_c0_g2_i11	SPTCS_MOUSE	81.5	0
TRINITY_DN21317_c0_g1	TRINITY_DN21317_c0_g1_i11	PLXD1_MOUSE	93.8	0
TRINITY_DN485_c0_g1	TRINITY_DN485_c0_g1_i14	APC2_MOUSE	88.5	0
TRINITY_DN4288_c1_g2	TRINITY_DN4288_c1_g2_i1	TITIN_MOUSE	92.2	0
TRINITY_DN82736_c0_g1	TRINITY_DN82736_c0_g1_i2	PCD23_HUMAN	66.3	0
TRINITY_DN165_c1_g3	TRINITY_DN165_c1_g3_i4	CBP_MOUSE	94.1	0
TRINITY_DN779_c1_g2	TRINITY_DN779_c1_g2_i2	FA8_MOUSE	81.4	0
TRINITY_DN2273_c1_g1	TRINITY_DN2273_c1_g1_i11	CAC1A_MOUSE	94.5	0
TRINITY_DN668_c0_g1	TRINITY_DN668_c0_g1_i7	BIG1_HUMAN	97.9	0
TRINITY_DN6250_c4_g1	TRINITY_DN6250_c4_g1_i1	ZFHX2_HUMAN	75.1	0
TRINITY_DN5075_c0_g1	TRINITY_DN5075_c0_g1_i1	HEAT1_HUMAN	84.7	0
TRINITY_DN25394_c0_g1	TRINITY_DN25394_c0_g1_i2	OBSCN_MOUSE	83.9	0
TRINITY_DN222_c0_g1	TRINITY_DN222_c0_g1_i14	UBR5_MOUSE	96.6	0
TRINITY_DN2166_c1_g1	TRINITY_DN2166_c1_g1_i6	HELZ_MOUSE	94.8	0
TRINITY_DN1167_c2_g1	TRINITY_DN1167_c2_g1_i24	HTR5A_MOUSE	90.3	0
TRINITY_DN2501_c0_g1	TRINITY_DN2501_c0_g1_i8	ELYS_MOUSE	81.6	0
TRINITY_DN1893_c0_g1	TRINITY_DN1893_c0_g1_i1	MYO10_RAT	96.8	0
TRINITY_DN2639_c1_g2	TRINITY_DN2639_c1_g2_i2	AKAP6_RAT	82.5	0
TRINITY_DN455_c0_g1	TRINITY_DN455_c0_g1_i8	CAC1H_MOUSE	67.9	0
TRINITY_DN952_c0_g1	TRINITY_DN952_c0_g1_i10	DOCK3_MOUSE	97.9	0
TRINITY_DN620_c1_g1	TRINITY_DN620_c1_g1_i4	WDR81_MOUSE	92.2	0
TRINITY_DN7403_c1_g2	TRINITY_DN7403_c1_g2_i3	SORL_MOUSE	96.2	0
TRINITY_DN4660_c0_g1	TRINITY_DN4660_c0_g1_i16	ESPL1_MOUSE	84.1	0
TRINITY_DN1025_c0_g1	TRINITY_DN1025_c0_g1_i2	ATG2A_MOUSE	92.1	0
TRINITY_DN2813_c0_g1	TRINITY_DN2813_c0_g1_i4	BTAF1_HUMAN	95.9	0
TRINITY_DN6747_c0_g1	TRINITY_DN6747_c0_g1_i3	DOCK2_MOUSE	96.1	0
TRINITY_DN3509_c1_g1	TRINITY_DN3509_c1_g1_i7	IGS10_RAT	73.6	0
TRINITY_DN11022_c0_g2	TRINITY_DN11022_c0_g2_i10	TEN2_HUMAN	98.7	0
TRINITY_DN4639_c0_g2	TRINITY_DN4639_c0_g2_i3	DOCK4_MOUSE	98.6	0
TRINITY_DN10062_c0_g1	TRINITY_DN10062_c0_g1_i9	VWA8_MOUSE	90.5	0
TRINITY_DN616_c0_g1	TRINITY_DN616_c0_g1_i12	UBR3_MOUSE	95.1	0
TRINITY_DN1645_c0_g1	TRINITY_DN1645_c0_g1_i9	PO210_MOUSE	94.5	0
TRINITY_DN389_c0_g1	TRINITY_DN389_c0_g1_i6	IF172_MOUSE	95.6	0
TRINITY_DN2250_c0_g1	TRINITY_DN2250_c0_g1_i7	RGPA2_RAT	95.3	0
TRINITY_DN1106_c0_g1	TRINITY_DN1106_c0_g1_i2	ATL1_MOUSE	93.3	0
TRINITY_DN3037_c0_g1	TRINITY_DN3037_c0_g1_i5	DOCK5_MOUSE	96.6	0
TRINITY_DN25487_c0_g1	TRINITY_DN25487_c0_g1_i15	NAV3_MOUSE	92.3	0
TRINITY_DN15332_c0_g1	TRINITY_DN15332_c0_g1_i16	TRPM6_MOUSE	84.9	0
TRINITY_DN20729_c0_g1	TRINITY_DN20729_c0_g1_i8	DOCK1_MOUSE	98.7	0
TRINITY_DN6466_c0_g1	TRINITY_DN6466_c0_g1_i2	DICER_CRIGR	98.6	0
TRINITY_DN3406_c0_g1	TRINITY_DN3406_c0_g1_i2	WNK1_MOUSE	88.5	0
TRINITY_DN3746_c0_g1	TRINITY_DN3746_c0_g1_i1	MYOF_MOUSE	95.5	0
TRINITY_DN2388_c0_g1	TRINITY_DN2388_c0_g1_i9	GVIN1_MOUSE	71.1	0
TRINITY_DN5279_c0_g2	TRINITY_DN5279_c0_g2_i1	ABCA1_MOUSE	95.9	0
TRINITY_DN742_c2_g1	TRINITY_DN742_c2_g1_i13	DEN4C_MOUSE	89.1	0
TRINITY_DN546_c2_g1	TRINITY_DN546_c2_g1_i3	MAP1A_MOUSE	85.8	0
TRINITY_DN31556_c0_g2	TRINITY_DN31556_c0_g2_i9	MYCPP_HUMAN	92.5	0
TRINITY_DN1706_c0_g1	TRINITY_DN1706_c0_g1_i1	CO6A3_HUMAN	87	0
TRINITY_DN2023_c0_g1	TRINITY_DN2023_c0_g1_i7	BIG2_MOUSE	95.8	0
TRINITY_DN1706_c0_g2	TRINITY_DN1706_c0_g2_i10	CO6A3_HUMAN	86.9	0
TRINITY_DN21850_c0_g1	TRINITY_DN21850_c0_g1_i2	CO6A5_MOUSE	86.7	0
TRINITY_DN3859_c0_g2	TRINITY_DN3859_c0_g2_i12	MPDZ_RAT	90	0
TRINITY_DN18491_c0_g1	TRINITY_DN18491_c0_g1_i2	ASXL3_MOUSE	86.7	0
TRINITY_DN1740_c0_g1	TRINITY_DN1740_c0_g1_i4	MYO7A_MOUSE	92.4	0
TRINITY_DN165_c1_g2	TRINITY_DN165_c1_g2_i2	EP300_MOUSE	90	0
TRINITY_DN9751_c0_g1	TRINITY_DN9751_c0_g1_i13	TRPM7_MOUSE	73.9	0
TRINITY_DN5212_c0_g1	TRINITY_DN5212_c0_g1_i9	PLEC_MOUSE	96.3	0
TRINITY_DN285_c0_g1	TRINITY_DN285_c0_g1_i6	PI4KA_MOUSE	74	0
TRINITY_DN1921_c0_g2	TRINITY_DN1921_c0_g2_i1	UBR2_MOUSE	93.2	0
TRINITY_DN859_c0_g1	TRINITY_DN859_c0_g1_i4	NALCN_RAT	98.6	0
TRINITY_DN7315_c0_g1	TRINITY_DN7315_c0_g1_i2	SI1L3_MOUSE	95.2	0
TRINITY_DN5146_c0_g1	TRINITY_DN5146_c0_g1_i6	CO6A6_MOUSE	91.8	0
TRINITY_DN3878_c1_g1	TRINITY_DN3878_c1_g1_i4	THADA_MOUSE	87.2	0
TRINITY_DN875_c0_g1	TRINITY_DN875_c0_g1_i9	NU188_MOUSE	97.2	0
TRINITY_DN3992_c0_g1	TRINITY_DN3992_c0_g1_i10	UBR1_MOUSE	94.3	0
TRINITY_DN1705_c0_g3	TRINITY_DN1705_c0_g3_i1	DYH10_HUMAN	82	0
TRINITY_DN2204_c0_g1	TRINITY_DN2204_c0_g1_i10	THS7A_MOUSE	93.1	0
TRINITY_DN1070_c1_g1	TRINITY_DN1070_c1_g1_i4	BPTF_HUMAN	78.2	0
TRINITY_DN4792_c0_g1	TRINITY_DN4792_c0_g1_i7	LAMA4_MOUSE	90.3	0
TRINITY_DN40919_c0_g1	TRINITY_DN40919_c0_g1_i15	LY75_MESAU	87.3	0
TRINITY_DN6198_c0_g1	TRINITY_DN6198_c0_g1_i6	GBF1_CRIGR	96.5	0
TRINITY_DN6569_c0_g2	TRINITY_DN6569_c0_g2_i11	SI1L1_MOUSE	96.8	0
TRINITY_DN4388_c0_g2	TRINITY_DN4388_c0_g2_i11	MTMRD_HUMAN	93.8	0
TRINITY_DN1164_c1_g1	TRINITY_DN1164_c1_g1_i8	TAF1_MOUSE	95.5	0
TRINITY_DN3171_c1_g1	TRINITY_DN3171_c1_g1_i6	RIF1_MOUSE	76.6	0
TRINITY_DN93176_c0_g1	TRINITY_DN93176_c0_g1_i5	KIF1A_MOUSE	98.4	0
TRINITY_DN52117_c0_g1	TRINITY_DN52117_c0_g1_i7	RLF_HUMAN	86	0
TRINITY_DN12980_c0_g1	TRINITY_DN12980_c0_g1_i6	FCGBP_HUMAN	62.6	0
TRINITY_DN2224_c0_g1	TRINITY_DN2224_c0_g1_i18	AKP13_HUMAN	72.5	0
TRINITY_DN191_c0_g1	TRINITY_DN191_c0_g1_i6	PLXB2_MOUSE	91.3	0
TRINITY_DN10191_c0_g1	TRINITY_DN10191_c0_g1_i7	SI1L2_MOUSE	94.9	0
TRINITY_DN8149_c0_g1	TRINITY_DN8149_c0_g1_i17	FR1L6_HUMAN	87.3	0
TRINITY_DN259_c0_g6	TRINITY_DN259_c0_g6_i1	CHD7_MOUSE	94.8	0
TRINITY_DN779_c1_g3	TRINITY_DN779_c1_g3_i3	FA8_MOUSE	80.7	0
TRINITY_DN2488_c0_g1	TRINITY_DN2488_c0_g1_i4	CHD3_HUMAN	93.7	0
TRINITY_DN1902_c0_g1	TRINITY_DN1902_c0_g1_i8	VIR_MOUSE	96.9	0
TRINITY_DN6988_c0_g3	TRINITY_DN6988_c0_g3_i2	EMAL5_RAT	97.6	0
TRINITY_DN712_c2_g1	TRINITY_DN712_c2_g1_i8	XRN1_MOUSE	90.8	0
TRINITY_DN2621_c1_g1	TRINITY_DN2621_c1_g1_i2	KDM5A_MOUSE	97.3	0
TRINITY_DN3553_c0_g1	TRINITY_DN3553_c0_g1_i2	PLXA4_MOUSE	97.5	0
TRINITY_DN872_c1_g1	TRINITY_DN872_c1_g1_i5	TEP1_RAT	83.2	0
TRINITY_DN1418_c1_g1	TRINITY_DN1418_c1_g1_i2	PRC2C_MOUSE	89	0
TRINITY_DN3176_c0_g1	TRINITY_DN3176_c0_g1_i5	RICTR_HUMAN	93.7	0
TRINITY_DN1393_c0_g1	TRINITY_DN1393_c0_g1_i4	UN13B_MOUSE	97.6	0
TRINITY_DN1438_c0_g1	TRINITY_DN1438_c0_g1_i6	PLXB1_MOUSE	92.2	0
TRINITY_DN5240_c0_g1	TRINITY_DN5240_c0_g1_i1	KI26A_MOUSE	90.9	0
TRINITY_DN6915_c0_g1	TRINITY_DN6915_c0_g1_i1	F179B_MOUSE	92.2	0
TRINITY_DN39_c1_g2	TRINITY_DN39_c1_g2_i2	DESP_HUMAN	94	0
TRINITY_DN121_c1_g1	TRINITY_DN121_c1_g1_i24	MYO9B_RAT	86.1	0
TRINITY_DN4683_c0_g1	TRINITY_DN4683_c0_g1_i6	SPEG_MOUSE	90.4	0
TRINITY_DN1727_c0_g1	TRINITY_DN1727_c0_g1_i7	TRIPC_MOUSE	97.2	0
TRINITY_DN4878_c0_g1	TRINITY_DN4878_c0_g1_i14	P3C2B_HUMAN	93.9	0
TRINITY_DN8341_c0_g1	TRINITY_DN8341_c0_g1_i25	TRPM3_HUMAN	93.4	0
TRINITY_DN901_c5_g1	TRINITY_DN901_c5_g1_i2	ARHGH_MOUSE	80.3	0
TRINITY_DN1208_c0_g1	TRINITY_DN1208_c0_g1_i5	PCX3_MOUSE	59	0
TRINITY_DN15294_c0_g1	TRINITY_DN15294_c0_g1_i4	PAPP1_MOUSE	94.3	0
TRINITY_DN2240_c1_g1	TRINITY_DN2240_c1_g1_i5	RPA1_RAT	94.3	0
TRINITY_DN1635_c0_g1	TRINITY_DN1635_c0_g1_i7	RAI1_MOUSE	90.1	0
TRINITY_DN1302_c1_g1	TRINITY_DN1302_c1_g1_i4	LTN1_MOUSE	88.7	0
TRINITY_DN1487_c1_g1	TRINITY_DN1487_c1_g1_i14	ABCA3_MOUSE	94.1	0
TRINITY_DN10_c3_g1	TRINITY_DN10_c3_g1_i12	PHIP_MOUSE	96.3	0
TRINITY_DN2820_c0_g1	TRINITY_DN2820_c0_g1_i3	MYLK_MOUSE	90.5	0
TRINITY_DN796_c0_g2	TRINITY_DN796_c0_g2_i3	KIF1B_MOUSE	90.8	0
TRINITY_DN2931_c0_g1	TRINITY_DN2931_c0_g1_i18	KI13A_HUMAN	92.1	0
TRINITY_DN1820_c2_g1	TRINITY_DN1820_c2_g1_i10	UBP32_HUMAN	95.4	0
TRINITY_DN3298_c0_g1	TRINITY_DN3298_c0_g1_i18	SVIL_MOUSE	84.8	0
TRINITY_DN1527_c0_g1	TRINITY_DN1527_c0_g1_i13	ZSWM8_MOUSE	82.7	0
TRINITY_DN6815_c0_g3	TRINITY_DN6815_c0_g3_i1	K2018_HUMAN	78.3	0
TRINITY_DN4391_c0_g1	TRINITY_DN4391_c0_g1_i16	P3C2A_MOUSE	93.6	0
TRINITY_DN562_c2_g1	TRINITY_DN562_c2_g1_i2	GRB1L_MOUSE	92.1	0
TRINITY_DN942_c2_g1	TRINITY_DN942_c2_g1_i2	GANP_MOUSE	82.3	0
TRINITY_DN7669_c0_g2	TRINITY_DN7669_c0_g2_i8	ALMS1_MOUSE	55.9	0
TRINITY_DN3762_c0_g1	TRINITY_DN3762_c0_g1_i1	DIP2B_MOUSE	98.1	0
TRINITY_DN3762_c0_g3	TRINITY_DN3762_c0_g3_i1	DIP2C_HUMAN	99.2	0
TRINITY_DN2766_c0_g1	TRINITY_DN2766_c0_g1_i8	CLH1_BOVIN	99.9	0
TRINITY_DN3190_c1_g1	TRINITY_DN3190_c1_g1_i10	DEPD5_MOUSE	95.7	0
TRINITY_DN53196_c0_g1	TRINITY_DN53196_c0_g1_i6	BCOR_MOUSE	91	0
TRINITY_DN1608_c0_g1	TRINITY_DN1608_c0_g1_i1	TANC2_MOUSE	96.9	0
TRINITY_DN130702_c0_g3	TRINITY_DN130702_c0_g3_i1	PREX2_HUMAN	94.3	0
TRINITY_DN6850_c0_g1	TRINITY_DN6850_c0_g1_i6	VKIND_MOUSE	90.9	0
TRINITY_DN3859_c0_g1	TRINITY_DN3859_c0_g1_i6	INADL_MOUSE	86.6	0
TRINITY_DN1266_c0_g1	TRINITY_DN1266_c0_g1_i8	GON4L_MOUSE	80	0
TRINITY_DN322_c1_g1	TRINITY_DN322_c1_g1_i5	ABCA5_RAT	93.8	0
TRINITY_DN798_c0_g1	TRINITY_DN798_c0_g1_i7	TOP2B_CRILO	98.6	0
TRINITY_DN6064_c0_g1	TRINITY_DN6064_c0_g1_i12	ARAP2_MOUSE	89.6	0
TRINITY_DN957_c0_g1	TRINITY_DN957_c0_g1_i31	AGRIN_RAT	63.1	0
TRINITY_DN554_c0_g1	TRINITY_DN554_c0_g1_i14	SHPRH_MOUSE	91.1	0
TRINITY_DN890_c0_g1	TRINITY_DN890_c0_g1_i1	RPB1_HUMAN	100	0
TRINITY_DN1312_c0_g2	TRINITY_DN1312_c0_g2_i15	TIAM2_MOUSE	89.8	0
TRINITY_DN18963_c0_g1	TRINITY_DN18963_c0_g1_i6	ATL3_HUMAN	83.8	0
TRINITY_DN6308_c0_g1	TRINITY_DN6308_c0_g1_i4	MYO5B_MOUSE	94.2	0
TRINITY_DN193_c0_g1	TRINITY_DN193_c0_g1_i13	CRBG3_HUMAN	65	0
TRINITY_DN1814_c2_g1	TRINITY_DN1814_c2_g1_i1	TENA_MOUSE	93.8	0
TRINITY_DN2909_c0_g1	TRINITY_DN2909_c0_g1_i17	PLXA3_RAT	97.3	0
TRINITY_DN493_c2_g1	TRINITY_DN493_c2_g1_i1	BD1L1_MOUSE	71.7	0
TRINITY_DN2655_c0_g1	TRINITY_DN2655_c0_g1_i8	CASZ1_MOUSE	93.4	0
TRINITY_DN4091_c0_g2	TRINITY_DN4091_c0_g2_i7	ROBO1_MOUSE	96.3	0
TRINITY_DN1907_c0_g1	TRINITY_DN1907_c0_g1_i22	TTC3_MOUSE	80.8	0
TRINITY_DN1422_c0_g1	TRINITY_DN1422_c0_g1_i4	DOCK6_MOUSE	95.3	0
TRINITY_DN792_c0_g2	TRINITY_DN792_c0_g2_i1	KDM5B_HUMAN	94.8	0
TRINITY_DN1774_c0_g1	TRINITY_DN1774_c0_g1_i1	F208B_MOUSE	58.3	0
TRINITY_DN5126_c0_g1	TRINITY_DN5126_c0_g1_i1	RHG21_MOUSE	88.5	0
TRINITY_DN4865_c0_g1	TRINITY_DN4865_c0_g1_i11	KDM3B_HUMAN	93.3	0
TRINITY_DN2488_c0_g2	TRINITY_DN2488_c0_g2_i7	CHD4_HUMAN	97.2	0
TRINITY_DN1507_c0_g1	TRINITY_DN1507_c0_g1_i3	NPA1P_MOUSE	88.1	0
TRINITY_DN4559_c0_g1	TRINITY_DN4559_c0_g1_i14	AGRL3_RAT	95.9	0
TRINITY_DN7680_c0_g1	TRINITY_DN7680_c0_g1_i8	MRC2_RAT	93.8	0
TRINITY_DN2429_c0_g1	TRINITY_DN2429_c0_g1_i2	CAD23_RAT	97.1	0
TRINITY_DN1658_c0_g1	TRINITY_DN1658_c0_g1_i6	ZNFX1_MOUSE	87.4	0
TRINITY_DN6384_c0_g2	TRINITY_DN6384_c0_g2_i1	FA5_MOUSE	76.4	0
TRINITY_DN1902_c2_g1	TRINITY_DN1902_c2_g1_i35	MTMR5_MOUSE	97.2	0
TRINITY_DN2900_c0_g3	TRINITY_DN2900_c0_g3_i2	FBN2_MOUSE	97.9	0
TRINITY_DN1312_c0_g1	TRINITY_DN1312_c0_g1_i1	TIAM1_MOUSE	96.5	0
TRINITY_DN1328_c0_g2	TRINITY_DN1328_c0_g2_i1	ARI1A_MOUSE	96.7	0
TRINITY_DN29_c3_g1	TRINITY_DN29_c3_g1_i2	LPH_RAT	82.3	0
TRINITY_DN1685_c0_g1	TRINITY_DN1685_c0_g1_i1	CAC1E_MOUSE	98.5	0
TRINITY_DN4372_c0_g1	TRINITY_DN4372_c0_g1_i11	MY18A_MOUSE	96.6	0
TRINITY_DN2856_c0_g2	TRINITY_DN2856_c0_g2_i22	DLG5_HUMAN	89.9	0
TRINITY_DN181_c0_g1	TRINITY_DN181_c0_g1_i12	IQGA1_MOUSE	97.9	0
TRINITY_DN21978_c0_g1	TRINITY_DN21978_c0_g1_i5	RNF17_MOUSE	88.6	0
TRINITY_DN3886_c0_g1	TRINITY_DN3886_c0_g1_i19	NUP98_MOUSE	95	0
TRINITY_DN13395_c0_g1	TRINITY_DN13395_c0_g1_i8	PCLO_RAT	93.5	0
TRINITY_DN8253_c0_g1	TRINITY_DN8253_c0_g1_i7	PEAK1_MOUSE	89.8	0
TRINITY_DN2934_c0_g1	TRINITY_DN2934_c0_g1_i5	MYOM1_MOUSE	90.6	0
TRINITY_DN1603_c0_g1	TRINITY_DN1603_c0_g1_i7	DIDO1_MOUSE	85.4	0
TRINITY_DN58577_c0_g2	TRINITY_DN58577_c0_g2_i1	THS7B_MOUSE	93.6	0
TRINITY_DN1616_c3_g1	TRINITY_DN1616_c3_g1_i1	PTPRK_MOUSE	98.2	0
TRINITY_DN4128_c1_g1	TRINITY_DN4128_c1_g1_i4	PTPRM_MOUSE	98.3	0
TRINITY_DN113_c0_g1	TRINITY_DN113_c0_g1_i6	RRP5_MOUSE	84.2	0
TRINITY_DN321_c0_g1	TRINITY_DN321_c0_g1_i13	LAMB2_RAT	88.8	0
TRINITY_DN51097_c0_g1	TRINITY_DN51097_c0_g1_i4	MAP1B_MOUSE	92.7	0
TRINITY_DN3576_c1_g1	TRINITY_DN3576_c1_g1_i4	UGGG1_RAT	95.1	0
TRINITY_DN4128_c1_g4	TRINITY_DN4128_c1_g4_i4	PTPRU_MOUSE	97.4	0
TRINITY_DN5757_c0_g1	TRINITY_DN5757_c0_g1_i17	MARF1_RAT	70.3	0
TRINITY_DN596_c1_g1	TRINITY_DN596_c1_g1_i4	KI13B_HUMAN	86.5	0
TRINITY_DN420_c1_g1	TRINITY_DN420_c1_g1_i13	OBSL1_RAT	92.9	0
TRINITY_DN4285_c0_g1	TRINITY_DN4285_c0_g1_i31	ABCC9_MOUSE	96.5	0
TRINITY_DN370_c2_g1	TRINITY_DN370_c2_g1_i2	PLCH1_MOUSE	88.5	0
TRINITY_DN2724_c3_g2	TRINITY_DN2724_c3_g2_i1	KAT6A_MOUSE	93.2	0
TRINITY_DN5823_c1_g1	TRINITY_DN5823_c1_g1_i4	K0556_MOUSE	88.7	0
TRINITY_DN2502_c0_g1	TRINITY_DN2502_c0_g1_i6	ARID2_HUMAN	91.5	0
TRINITY_DN1093_c0_g2	TRINITY_DN1093_c0_g2_i7	E2AK4_MOUSE	94.5	0
TRINITY_DN368_c0_g1	TRINITY_DN368_c0_g1_i2	CPSF1_MOUSE	98.6	0
TRINITY_DN1102_c0_g1	TRINITY_DN1102_c0_g1_i9	SPT6H_MOUSE	99.3	0
TRINITY_DN14290_c0_g2	TRINITY_DN14290_c0_g2_i1	RHG35_MOUSE	98.9	0
TRINITY_DN13508_c0_g1	TRINITY_DN13508_c0_g1_i6	TULP4_MOUSE	97.2	0
TRINITY_DN6749_c0_g1	TRINITY_DN6749_c0_g1_i2	ALK_MOUSE	94.2	0
TRINITY_DN6588_c0_g2	TRINITY_DN6588_c0_g2_i6	MRCKA_MOUSE	93.1	0
TRINITY_DN6953_c0_g1	TRINITY_DN6953_c0_g1_i14	ITB4_MOUSE	65.5	0
TRINITY_DN3762_c0_g2	TRINITY_DN3762_c0_g2_i4	DIP2A_MOUSE	87.3	0
TRINITY_DN1200_c0_g1	TRINITY_DN1200_c0_g1_i1	M3K4_MOUSE	93.1	0
TRINITY_DN2799_c0_g1	TRINITY_DN2799_c0_g1_i1	ATRX_MOUSE	83.9	0
TRINITY_DN675_c2_g1	TRINITY_DN675_c2_g1_i3	TICRR_MOUSE	79.4	0
TRINITY_DN11393_c0_g1	TRINITY_DN11393_c0_g1_i5	AQR_MOUSE	98	0
TRINITY_DN33996_c0_g1	TRINITY_DN33996_c0_g1_i13	CHD5_RAT	78.5	0
TRINITY_DN97_c2_g1	TRINITY_DN97_c2_g1_i3	RHG05_HUMAN	95.5	0
TRINITY_DN3717_c0_g1	TRINITY_DN3717_c0_g1_i19	ANK2_MOUSE	77.7	0
TRINITY_DN1365_c0_g1	TRINITY_DN1365_c0_g1_i8	BAZ2A_MOUSE	84.6	0
TRINITY_DN1740_c1_g1	TRINITY_DN1740_c1_g1_i5	MYO7B_MOUSE	87	0
TRINITY_DN5350_c0_g1	TRINITY_DN5350_c0_g1_i4	NEUL4_MOUSE	96	0
TRINITY_DN8247_c1_g1	TRINITY_DN8247_c1_g1_i3	CAMP1_RAT	95.1	0
TRINITY_DN1903_c1_g1	TRINITY_DN1903_c1_g1_i3	TNR6B_HUMAN	91.8	0
TRINITY_DN213_c0_g1	TRINITY_DN213_c0_g1_i6	COEA1_MOUSE	94.9	0
TRINITY_DN1521_c0_g1	TRINITY_DN1521_c0_g1_i4	SPG17_MOUSE	80	0
TRINITY_DN1000_c0_g1	TRINITY_DN1000_c0_g1_i9	MTCL1_MOUSE	87.6	0
TRINITY_DN1814_c1_g2	TRINITY_DN1814_c1_g2_i6	AGRL1_MOUSE	99	0
TRINITY_DN393_c0_g1	TRINITY_DN393_c0_g1_i8	STAB1_MOUSE	77.5	0
TRINITY_DN1621_c0_g1	TRINITY_DN1621_c0_g1_i3	ZMYM4_MOUSE	95.6	0
TRINITY_DN6513_c0_g1	TRINITY_DN6513_c0_g1_i10	WNK2_MOUSE	87.3	0
TRINITY_DN6997_c1_g1	TRINITY_DN6997_c1_g1_i1	ATRN1_MOUSE	96.4	0
TRINITY_DN2029_c4_g1	TRINITY_DN2029_c4_g1_i1	C2CD3_MOUSE	81.7	0
TRINITY_DN1251_c0_g1	TRINITY_DN1251_c0_g1_i1	TCF20_MOUSE	95.5	0
TRINITY_DN5254_c0_g1	TRINITY_DN5254_c0_g1_i1	HECW2_MOUSE	94.5	0
TRINITY_DN164_c1_g1	TRINITY_DN164_c1_g1_i1	INSR_MOUSE	98.6	0
TRINITY_DN7683_c0_g1	TRINITY_DN7683_c0_g1_i13	BRWD3_MOUSE	95.6	0
TRINITY_DN706_c0_g1	TRINITY_DN706_c0_g1_i4	NYNRI_MOUSE	77.7	0
TRINITY_DN5879_c0_g1	TRINITY_DN5879_c0_g1_i5	RPGF6_HUMAN	89.6	0
TRINITY_DN8637_c0_g1	TRINITY_DN8637_c0_g1_i9	GDE_CANLF	70.8	0
TRINITY_DN21_c0_g3	TRINITY_DN21_c0_g3_i3	CE290_MOUSE	83.1	0
TRINITY_DN674_c2_g1	TRINITY_DN674_c2_g1_i3	MRP1_MOUSE	93.3	0
TRINITY_DN2900_c0_g2	TRINITY_DN2900_c0_g2_i1	FBN1_MOUSE	96.7	0
TRINITY_DN1456_c0_g1	TRINITY_DN1456_c0_g1_i20	CIC_MOUSE	79.6	0
TRINITY_DN3727_c0_g1	TRINITY_DN3727_c0_g1_i4	ROBO2_MOUSE	96.9	0
TRINITY_DN22636_c0_g1	TRINITY_DN22636_c0_g1_i4	TENN_MOUSE	94.1	0
TRINITY_DN7717_c0_g1	TRINITY_DN7717_c0_g1_i26	AGRB2_MOUSE	95.1	0
TRINITY_DN219_c3_g1	TRINITY_DN219_c3_g1_i4	SN_MOUSE	82.1	0
TRINITY_DN16037_c0_g1	TRINITY_DN16037_c0_g1_i4	RPGF2_MOUSE	97.9	0
TRINITY_DN3237_c0_g1	TRINITY_DN3237_c0_g1_i21	PLXC1_MOUSE	95	0
TRINITY_DN7838_c0_g1	TRINITY_DN7838_c0_g1_i2	EVPL_MOUSE	87.4	0
TRINITY_DN3474_c0_g2	TRINITY_DN3474_c0_g2_i9	SYEP_MOUSE	93.8	0
TRINITY_DN50566_c0_g1	TRINITY_DN50566_c0_g1_i1	MY18B_HUMAN	72.2	0
TRINITY_DN13025_c0_g2	TRINITY_DN13025_c0_g2_i8	WNK3_MOUSE	85.8	0
TRINITY_DN5240_c0_g2	TRINITY_DN5240_c0_g2_i1	KI26B_MOUSE	92.2	0
TRINITY_DN6608_c0_g1	TRINITY_DN6608_c0_g1_i4	MADD_RAT	92.4	0
TRINITY_DN546_c0_g1	TRINITY_DN546_c0_g1_i3	IGF1R_MOUSE	99.6	0
TRINITY_DN5565_c1_g1	TRINITY_DN5565_c1_g1_i13	MYO5C_HUMAN	85.9	0
TRINITY_DN24395_c0_g1	TRINITY_DN24395_c0_g1_i2	KMT2C_MOUSE	90.8	0
TRINITY_DN2204_c1_g1	TRINITY_DN2204_c1_g1_i4	PHF3_HUMAN	77.3	0
TRINITY_DN430_c1_g1	TRINITY_DN430_c1_g1_i25	RIMB1_MOUSE	78.7	0
TRINITY_DN2800_c1_g1	TRINITY_DN2800_c1_g1_i4	K1549_MOUSE	80.3	0
TRINITY_DN796_c1_g1	TRINITY_DN796_c1_g1_i3	ARIP4_MOUSE	98.2	0
TRINITY_DN221_c0_g1	TRINITY_DN221_c0_g1_i7	LAMB1_MOUSE	95.1	0
TRINITY_DN808_c0_g1	TRINITY_DN808_c0_g1_i7	PB1_HUMAN	96.2	0
TRINITY_DN971_c1_g1	TRINITY_DN971_c1_g1_i16	CTRO_HUMAN	89.3	0
TRINITY_DN11328_c0_g1	TRINITY_DN11328_c0_g1_i2	DISP1_MOUSE	90.4	0
TRINITY_DN13737_c0_g2	TRINITY_DN13737_c0_g2_i6	C8AP2_MOUSE	79.3	0
TRINITY_DN1332_c1_g1	TRINITY_DN1332_c1_g1_i2	VPRBP_MOUSE	99	0
TRINITY_DN8_c1_g1	TRINITY_DN8_c1_g1_i6	PTC1_MOUSE	98.2	0
TRINITY_DN4929_c0_g1	TRINITY_DN4929_c0_g1_i25	ICE1_MOUSE	75.1	0
TRINITY_DN3424_c0_g1	TRINITY_DN3424_c0_g1_i11	MRCKG_MOUSE	92.1	0
TRINITY_DN1363_c0_g2	TRINITY_DN1363_c0_g2_i2	TUT4_MOUSE	92	0
TRINITY_DN122_c0_g1	TRINITY_DN122_c0_g1_i1	ZC3H1_HUMAN	90.3	0
TRINITY_DN1328_c1_g1	TRINITY_DN1328_c1_g1_i13	SKT_MOUSE	86.9	0
TRINITY_DN788_c0_g1	TRINITY_DN788_c0_g1_i1	GAPD1_MOUSE	98.5	0
TRINITY_DN53844_c0_g1	TRINITY_DN53844_c0_g1_i5	RPTOR_MOUSE	99.5	0
TRINITY_DN18847_c0_g1	TRINITY_DN18847_c0_g1_i1	WDR7_MOUSE	95	0
TRINITY_DN562_c1_g1	TRINITY_DN562_c1_g1_i5	GREB1_MOUSE	94.7	0
TRINITY_DN2386_c2_g1	TRINITY_DN2386_c2_g1_i1	ATP7A_MOUSE	94.4	0
TRINITY_DN482_c1_g2	TRINITY_DN482_c1_g2_i7	NU160_MOUSE	95.7	0
TRINITY_DN1814_c1_g1	TRINITY_DN1814_c1_g1_i2	AGRL2_MOUSE	91.8	0
TRINITY_DN2581_c0_g2	TRINITY_DN2581_c0_g2_i11	ABCA9_MOUSE	83.7	0
TRINITY_DN961_c1_g1	TRINITY_DN961_c1_g1_i7	IQGA2_MOUSE	94.3	0
TRINITY_DN1860_c0_g1	TRINITY_DN1860_c0_g1_i25	TENS3_MOUSE	92.7	0
TRINITY_DN1172_c0_g2	TRINITY_DN1172_c0_g2_i1	PRR12_MOUSE	91.7	0
TRINITY_DN1963_c1_g1	TRINITY_DN1963_c1_g1_i6	IF4G1_MOUSE	93.5	0
TRINITY_DN1777_c0_g1	TRINITY_DN1777_c0_g1_i1	ATRN_MOUSE	95.9	0
TRINITY_DN7103_c0_g1	TRINITY_DN7103_c0_g1_i12	ALPK2_MOUSE	67.7	0
TRINITY_DN792_c0_g1	TRINITY_DN792_c0_g1_i2	KDM5C_MOUSE	96.7	0
TRINITY_DN381_c2_g2	TRINITY_DN381_c2_g2_i7	ANKH1_HUMAN	90.3	0
TRINITY_DN2540_c0_g2	TRINITY_DN2540_c0_g2_i17	ZN318_MOUSE	77.5	0
TRINITY_DN4931_c0_g1	TRINITY_DN4931_c0_g1_i4	KCP_MOUSE	88.2	0
TRINITY_DN2752_c1_g2	TRINITY_DN2752_c1_g2_i10	KI21B_MOUSE	96	0
TRINITY_DN3179_c0_g1	TRINITY_DN3179_c0_g1_i14	FOCAD_MOUSE	90.2	0
TRINITY_DN52674_c0_g1	TRINITY_DN52674_c0_g1_i7	NWD1_MOUSE	87.8	0
TRINITY_DN6115_c0_g1	TRINITY_DN6115_c0_g1_i4	AHDC1_MOUSE	97.1	0
TRINITY_DN2408_c0_g2	TRINITY_DN2408_c0_g2_i1	TENS1_HUMAN	85.3	0
TRINITY_DN2353_c0_g1	TRINITY_DN2353_c0_g1_i6	TM131_MOUSE	91.9	0
TRINITY_DN365_c0_g1	TRINITY_DN365_c0_g1_i30	CNTP1_RAT	96.2	0
TRINITY_DN1780_c0_g1	TRINITY_DN1780_c0_g1_i2	TMEM2_MOUSE	91.8	0
TRINITY_DN1255_c8_g1	TRINITY_DN1255_c8_g1_i4	SETBP_MOUSE	92.2	0
TRINITY_DN28163_c0_g1	TRINITY_DN28163_c0_g1_i8	DPOLA_MOUSE	93.2	0
TRINITY_DN3849_c0_g2	TRINITY_DN3849_c0_g2_i4	NEO1_MOUSE	95.1	0
TRINITY_DN6588_c0_g1	TRINITY_DN6588_c0_g1_i4	MRCKB_MOUSE	92.8	0
TRINITY_DN831_c0_g1	TRINITY_DN831_c0_g1_i30	PTPRV_MOUSE	61.3	0
TRINITY_DN781_c0_g1	TRINITY_DN781_c0_g1_i49	MYOM3_MOUSE	93.3	0
TRINITY_DN1828_c4_g2	TRINITY_DN1828_c4_g2_i3	GLI3_MOUSE	93.6	0
TRINITY_DN1218_c2_g2	TRINITY_DN1218_c2_g2_i7	ARI1B_HUMAN	85.4	0
TRINITY_DN2883_c0_g2	TRINITY_DN2883_c0_g2_i1	BCORL_MOUSE	94.9	0
TRINITY_DN40730_c0_g1	TRINITY_DN40730_c0_g1_i6	ERBB4_MOUSE	99	0
TRINITY_DN699_c0_g1	TRINITY_DN699_c0_g1_i12	TPPC8_HUMAN	91.8	0
TRINITY_DN3644_c0_g1	TRINITY_DN3644_c0_g1_i23	TRPM2_MOUSE	94.4	0
TRINITY_DN895_c1_g1	TRINITY_DN895_c1_g1_i8	YTDC2_MOUSE	99.3	0
TRINITY_DN6415_c0_g1	TRINITY_DN6415_c0_g1_i5	FANCM_MOUSE	71.3	0
TRINITY_DN3325_c1_g1	TRINITY_DN3325_c1_g1_i4	VPS8_MOUSE	94	0
TRINITY_DN2404_c2_g1	TRINITY_DN2404_c2_g1_i9	SHRM3_MOUSE	76.5	0
TRINITY_DN4705_c0_g1	TRINITY_DN4705_c0_g1_i2	MGAL_HUMAN	76.1	0
TRINITY_DN6625_c0_g1	TRINITY_DN6625_c0_g1_i2	ASTN1_MOUSE	98.1	0
TRINITY_DN2115_c0_g1	TRINITY_DN2115_c0_g1_i18	VGFR3_MOUSE	95.1	0
TRINITY_DN14927_c1_g1	TRINITY_DN14927_c1_g1_i2	EXPH5_MOUSE	71.8	0
TRINITY_DN3722_c0_g1	TRINITY_DN3722_c0_g1_i1	GEMI5_MOUSE	86.5	0
TRINITY_DN846_c0_g1	TRINITY_DN846_c0_g1_i6	MON2_HUMAN	95.8	0
TRINITY_DN4513_c0_g1	TRINITY_DN4513_c0_g1_i1	DUOX2_RAT	85.5	0
TRINITY_DN1455_c0_g1	TRINITY_DN1455_c0_g1_i4	RIC1_MOUSE	96.4	0
TRINITY_DN1073_c0_g1	TRINITY_DN1073_c0_g1_i9	RLGPB_MOUSE	95.8	0
TRINITY_DN231_c0_g1	TRINITY_DN231_c0_g1_i7	SHAN3_MOUSE	83.5	0
TRINITY_DN3374_c0_g1	TRINITY_DN3374_c0_g1_i5	TOP2A_CRIGR	97.1	0
TRINITY_DN5114_c0_g1	TRINITY_DN5114_c0_g1_i5	SHAN2_RAT	96.2	0
TRINITY_DN3915_c0_g1	TRINITY_DN3915_c0_g1_i3	MBD5_MOUSE	82.3	0
TRINITY_DN3751_c1_g1	TRINITY_DN3751_c1_g1_i8	TANC1_MOUSE	93.1	0
TRINITY_DN2191_c1_g1	TRINITY_DN2191_c1_g1_i1	PRC2A_MOUSE	89.6	0
TRINITY_DN2537_c1_g1	TRINITY_DN2537_c1_g1_i8	NU155_MOUSE	96	0
TRINITY_DN4269_c0_g1	TRINITY_DN4269_c0_g1_i12	TTC37_HUMAN	84	0
TRINITY_DN2686_c1_g1	TRINITY_DN2686_c1_g1_i1	MED14_MOUSE	95.8	0
TRINITY_DN4626_c0_g1	TRINITY_DN4626_c0_g1_i2	MET_MOUSE	91.1	0
TRINITY_DN112_c1_g1	TRINITY_DN112_c1_g1_i22	PCM1_MOUSE	88.9	0
TRINITY_DN1544_c2_g1	TRINITY_DN1544_c2_g1_i18	UBP54_MOUSE	83.9	0
TRINITY_DN815_c0_g1	TRINITY_DN815_c0_g1_i18	ATS7_MOUSE	66.1	0
TRINITY_DN4159_c0_g1	TRINITY_DN4159_c0_g1_i12	MYO5A_MOUSE	96.3	0
TRINITY_DN2823_c0_g1	TRINITY_DN2823_c0_g1_i3	DOCK9_MOUSE	96.8	0
TRINITY_DN961_c2_g1	TRINITY_DN961_c2_g1_i4	XDH_RAT	93.8	0
TRINITY_DN720_c0_g1	TRINITY_DN720_c0_g1_i15	CHD2_MOUSE	96.1	0
TRINITY_DN7216_c0_g1	TRINITY_DN7216_c0_g1_i9	MAGI3_MOUSE	90.1	0
TRINITY_DN3561_c0_g3	TRINITY_DN3561_c0_g3_i6	NPHP4_MOUSE	89.1	0
TRINITY_DN10177_c0_g1	TRINITY_DN10177_c0_g1_i5	RBGPR_RAT	94.1	0
TRINITY_DN10249_c0_g1	TRINITY_DN10249_c0_g1_i8	CBPD_RAT	96.2	0
TRINITY_DN251_c2_g1	TRINITY_DN251_c2_g1_i3	PDS5A_RAT	98.5	0
TRINITY_DN7011_c0_g1	TRINITY_DN7011_c0_g1_i29	DEN5A_MOUSE	98.9	0
TRINITY_DN978_c0_g2	TRINITY_DN978_c0_g2_i5	ZO1_CANLF	77.1	0
TRINITY_DN3163_c0_g1	TRINITY_DN3163_c0_g1_i4	SAM9L_MOUSE	82.1	0
TRINITY_DN30638_c0_g1	TRINITY_DN30638_c0_g1_i1	TUTLB_HUMAN	95.2	0
TRINITY_DN2738_c0_g1	TRINITY_DN2738_c0_g1_i6	SYNJ2_RAT	88.5	0
TRINITY_DN3091_c1_g1	TRINITY_DN3091_c1_g1_i5	IF4G3_MOUSE	88.1	0
TRINITY_DN20077_c0_g1	TRINITY_DN20077_c0_g1_i2	ATAD5_MOUSE	76.5	0
TRINITY_DN2757_c0_g1	TRINITY_DN2757_c0_g1_i12	PUR4_MOUSE	93.3	0
TRINITY_DN4529_c0_g1	TRINITY_DN4529_c0_g1_i5	DDX60_HUMAN	74.1	0
TRINITY_DN1156_c0_g1	TRINITY_DN1156_c0_g1_i18	ADCY9_MOUSE	95.5	0
TRINITY_DN3446_c0_g1	TRINITY_DN3446_c0_g1_i5	KI21A_MOUSE	92.5	0
TRINITY_DN3300_c0_g1	TRINITY_DN3300_c0_g1_i6	TNR6C_MOUSE	91.2	0
TRINITY_DN1200_c1_g1	TRINITY_DN1200_c1_g1_i1	TET3_MOUSE	86.9	0
TRINITY_DN416_c0_g1	TRINITY_DN416_c0_g1_i3	ARHGB_RAT	87.5	0
TRINITY_DN2434_c0_g1	TRINITY_DN2434_c0_g1_i3	LAMC1_MOUSE	95.5	0
TRINITY_DN6417_c0_g1	TRINITY_DN6417_c0_g1_i2	CFTR_MOUSE	87.3	0
TRINITY_DN40628_c0_g1	TRINITY_DN40628_c0_g1_i1	APOB_HUMAN	100	0
TRINITY_DN30053_c0_g1	TRINITY_DN30053_c0_g1_i5	CYFP2_MOUSE	99.8	0
TRINITY_DN45633_c0_g1	TRINITY_DN45633_c0_g1_i1	FACD2_RAT	90.2	0
TRINITY_DN1850_c0_g1	TRINITY_DN1850_c0_g1_i11	ECM29_MOUSE	98.4	0
TRINITY_DN13329_c0_g1	TRINITY_DN13329_c0_g1_i5	PLCG2_RAT	97.8	0
TRINITY_DN93_c0_g1	TRINITY_DN93_c0_g1_i10	KMT2E_MOUSE	71.3	0
TRINITY_DN19952_c0_g1	TRINITY_DN19952_c0_g1_i18	CE192_HUMAN	69.6	0
TRINITY_DN4313_c0_g1	TRINITY_DN4313_c0_g1_i17	TTC28_MOUSE	94.6	0
TRINITY_DN3343_c1_g1	TRINITY_DN3343_c1_g1_i7	BDP1_MOUSE	64.9	0
TRINITY_DN132_c0_g1	TRINITY_DN132_c0_g1_i1	CYFP1_MOUSE	99.5	0
TRINITY_DN2371_c1_g1	TRINITY_DN2371_c1_g1_i1	CAHD1_MOUSE	97.2	0
TRINITY_DN4350_c0_g1	TRINITY_DN4350_c0_g1_i6	PLCH2_MOUSE	92.9	0
TRINITY_DN2125_c0_g1	TRINITY_DN2125_c0_g1_i4	PEPL_MOUSE	89.1	0
TRINITY_DN1041_c1_g1	TRINITY_DN1041_c1_g1_i7	NSD2_MOUSE	93.6	0
TRINITY_DN330_c0_g1	TRINITY_DN330_c0_g1_i6	TPR_MOUSE	85.5	0
TRINITY_DN17072_c0_g1	TRINITY_DN17072_c0_g1_i10	ASTN2_MOUSE	97.9	0
TRINITY_DN7807_c0_g1	TRINITY_DN7807_c0_g1_i12	CEMIP_MOUSE	95.3	0
TRINITY_DN5013_c1_g1	TRINITY_DN5013_c1_g1_i8	CLU_MOUSE	96.2	0
TRINITY_DN783_c1_g1	TRINITY_DN783_c1_g1_i1	NAV1_MOUSE	96.4	0
TRINITY_DN13085_c0_g1	TRINITY_DN13085_c0_g1_i3	FRPD1_MOUSE	84	0
TRINITY_DN5117_c1_g1	TRINITY_DN5117_c1_g1_i7	BAHC1_MOUSE	85.5	0
TRINITY_DN13920_c0_g1	TRINITY_DN13920_c0_g1_i16	P3C2G_MOUSE	81.5	0
TRINITY_DN12066_c0_g1	TRINITY_DN12066_c0_g1_i7	SSH2_MOUSE	89.7	0
TRINITY_DN3885_c2_g1	TRINITY_DN3885_c2_g1_i3	ALS2_MOUSE	93.6	0
TRINITY_DN1361_c0_g1	TRINITY_DN1361_c0_g1_i4	ACE_MESAU	91.8	0
TRINITY_DN5770_c0_g1	TRINITY_DN5770_c0_g1_i1	PCNT_MOUSE	50.3	0
TRINITY_DN10916_c0_g1	TRINITY_DN10916_c0_g1_i7	CLAP1_HUMAN	90.4	0
TRINITY_DN4677_c0_g1	TRINITY_DN4677_c0_g1_i10	ARHGC_MOUSE	91.1	0
TRINITY_DN8404_c0_g1	TRINITY_DN8404_c0_g1_i5	SYIC_MOUSE	95.3	0
TRINITY_DN3738_c0_g1	TRINITY_DN3738_c0_g1_i17	ADGB_MOUSE	78	0
TRINITY_DN14230_c0_g1	TRINITY_DN14230_c0_g1_i5	K2026_HUMAN	75	0
TRINITY_DN611_c4_g1	TRINITY_DN611_c4_g1_i3	M3K5_MOUSE	93.3	0
TRINITY_DN2828_c1_g2	TRINITY_DN2828_c1_g2_i23	TOPB1_MOUSE	82.9	0
TRINITY_DN8028_c1_g1	TRINITY_DN8028_c1_g1_i6	GLI2_MOUSE	91.5	0
TRINITY_DN3702_c0_g1	TRINITY_DN3702_c0_g1_i5	AT10D_MOUSE	89.7	0
TRINITY_DN4316_c0_g1	TRINITY_DN4316_c0_g1_i3	IBTK_MOUSE	89.8	0
TRINITY_DN2371_c0_g1	TRINITY_DN2371_c0_g1_i27	MABP1_MOUSE	89.7	0
TRINITY_DN4448_c0_g1	TRINITY_DN4448_c0_g1_i9	STAG1_MOUSE	99.4	0
TRINITY_DN3102_c0_g1	TRINITY_DN3102_c0_g1_i4	NCOA1_MOUSE	91.1	0
TRINITY_DN2333_c0_g1	TRINITY_DN2333_c0_g1_i15	PXDN_MOUSE	82.7	0
TRINITY_DN1853_c0_g1	TRINITY_DN1853_c0_g1_i24	RBCC1_MOUSE	91.3	0
TRINITY_DN428_c7_g1	TRINITY_DN428_c7_g1_i1	TRPS1_MOUSE	95.8	0
TRINITY_DN3590_c2_g2	TRINITY_DN3590_c2_g2_i1	NHS_HUMAN	85.4	0
TRINITY_DN7003_c1_g1	TRINITY_DN7003_c1_g1_i4	L1CAM_RAT	96	0
TRINITY_DN4002_c2_g1	TRINITY_DN4002_c2_g1_i8	CE170_MOUSE	86.7	0
TRINITY_DN47750_c0_g1	TRINITY_DN47750_c0_g1_i4	SOGA1_MOUSE	95.6	0
TRINITY_DN3918_c0_g1	TRINITY_DN3918_c0_g1_i18	CHD1_MOUSE	96	0
TRINITY_DN3533_c0_g1	TRINITY_DN3533_c0_g1_i56	PTN23_MOUSE	89.5	0
TRINITY_DN21956_c1_g1	TRINITY_DN21956_c1_g1_i24	UN13A_HUMAN	96.6	0
TRINITY_DN9546_c0_g1	TRINITY_DN9546_c0_g1_i4	ZN469_HUMAN	44.2	0
TRINITY_DN3165_c0_g1	TRINITY_DN3165_c0_g1_i2	ARAP1_MOUSE	91.8	0
TRINITY_DN5134_c2_g1	TRINITY_DN5134_c2_g1_i5	VIGLN_MOUSE	99.3	0
TRINITY_DN8059_c0_g1	TRINITY_DN8059_c0_g1_i2	INO80_MOUSE	97.3	0
TRINITY_DN20432_c0_g1	TRINITY_DN20432_c0_g1_i5	SPTN4_HUMAN	92.6	0
TRINITY_DN508_c1_g2	TRINITY_DN508_c1_g2_i3	SET1B_MOUSE	93.4	0
TRINITY_DN5729_c2_g1	TRINITY_DN5729_c2_g1_i4	MRP2_MOUSE	81.5	0
TRINITY_DN4521_c0_g1	TRINITY_DN4521_c0_g1_i1	KDIS_RAT	94.2	0
TRINITY_DN4668_c0_g1	TRINITY_DN4668_c0_g1_i5	PTPRZ_RAT	79.9	0
TRINITY_DN4488_c1_g1	TRINITY_DN4488_c1_g1_i7	PAR14_MOUSE	73.1	0
TRINITY_DN178_c1_g1	TRINITY_DN178_c1_g1_i3	MED1_HUMAN	93.4	0
TRINITY_DN1743_c1_g3	TRINITY_DN1743_c1_g3_i1	EST1A_MOUSE	92.7	0
TRINITY_DN3145_c0_g1	TRINITY_DN3145_c0_g1_i1	ER6L2_MOUSE	82.5	0
TRINITY_DN793_c0_g1	TRINITY_DN793_c0_g1_i33	IF140_HUMAN	81.4	0
TRINITY_DN23534_c0_g2	TRINITY_DN23534_c0_g2_i3	NRAP_MOUSE	86.1	0
TRINITY_DN3170_c0_g1	TRINITY_DN3170_c0_g1_i6	SETX_MOUSE	75.7	0
TRINITY_DN5491_c0_g1	TRINITY_DN5491_c0_g1_i6	RHG23_MOUSE	90.8	0
TRINITY_DN476_c2_g1	TRINITY_DN476_c2_g1_i5	UH1BL_MOUSE	85.7	0
TRINITY_DN3139_c1_g1	TRINITY_DN3139_c1_g1_i6	DEN5B_MOUSE	96	0
TRINITY_DN1506_c0_g1	TRINITY_DN1506_c0_g1_i11	KDM6A_HUMAN	94.5	0
TRINITY_DN2725_c0_g1	TRINITY_DN2725_c0_g1_i9	VGFR1_RAT	90	0
TRINITY_DN862_c0_g2	TRINITY_DN862_c0_g2_i10	C170B_MOUSE	71.7	0
TRINITY_DN6493_c0_g1	TRINITY_DN6493_c0_g1_i1	ZFYV9_HUMAN	86.7	0
TRINITY_DN19730_c1_g1	TRINITY_DN19730_c1_g1_i12	AOXD_MOUSE	87.1	0
TRINITY_DN11465_c0_g1	TRINITY_DN11465_c0_g1_i10	HCFC1_MESAU	89.8	0
TRINITY_DN19294_c0_g1	TRINITY_DN19294_c0_g1_i13	ZGRF1_MOUSE	69.1	0
TRINITY_DN2416_c1_g1	TRINITY_DN2416_c1_g1_i1	ZN407_HUMAN	71.9	0
TRINITY_DN24297_c2_g2	TRINITY_DN24297_c2_g2_i1	BROMI_MOUSE	92.8	0
TRINITY_DN5428_c1_g1	TRINITY_DN5428_c1_g1_i7	TBCD9_MOUSE	97.6	0
TRINITY_DN5005_c0_g1	TRINITY_DN5005_c0_g1_i22	ERBB3_MOUSE	93.3	0
TRINITY_DN6826_c0_g1	TRINITY_DN6826_c0_g1_i4	RPOA_PRRS1	50.8	0
TRINITY_DN6901_c0_g1	TRINITY_DN6901_c0_g1_i1	IGSF1_MOUSE	86.4	0
TRINITY_DN3184_c1_g2	TRINITY_DN3184_c1_g2_i14	ERBB2_MESAU	93.9	0
TRINITY_DN5795_c0_g1	TRINITY_DN5795_c0_g1_i1	AIM1_HUMAN	74.4	0
TRINITY_DN1755_c0_g1	TRINITY_DN1755_c0_g1_i10	PLA2R_MOUSE	67.5	0
TRINITY_DN2714_c1_g2	TRINITY_DN2714_c1_g2_i2	ZFY16_MOUSE	81.4	0
TRINITY_DN345_c0_g1	TRINITY_DN345_c0_g1_i4	ZMYM2_MOUSE	95.8	0
TRINITY_DN4522_c0_g2	TRINITY_DN4522_c0_g2_i10	GAK_MOUSE	92.3	0
TRINITY_DN1887_c0_g1	TRINITY_DN1887_c0_g1_i10	DNMT1_MOUSE	82.2	0
TRINITY_DN12747_c0_g2	TRINITY_DN12747_c0_g2_i10	VGFR2_MOUSE	91.8	0
TRINITY_DN1076_c0_g1	TRINITY_DN1076_c0_g1_i12	KPB1_MOUSE	97.6	0
TRINITY_DN491_c3_g1	TRINITY_DN491_c3_g1_i2	K0232_MOUSE	88.9	0
TRINITY_DN1306_c3_g1	TRINITY_DN1306_c3_g1_i7	RIMS2_MOUSE	88.3	0
TRINITY_DN453_c0_g2	TRINITY_DN453_c0_g2_i2	THOC2_MOUSE	97.6	0
TRINITY_DN2581_c0_g1	TRINITY_DN2581_c0_g1_i7	ABCA6_MOUSE	75.4	0
TRINITY_DN6652_c1_g1	TRINITY_DN6652_c1_g1_i8	UGGG2_HUMAN	78.4	0
TRINITY_DN445_c0_g1	TRINITY_DN445_c0_g1_i5	ZN638_MOUSE	77.7	0
TRINITY_DN69433_c0_g7	TRINITY_DN69433_c0_g7_i1	YEEJ_ECOLI	99.8	0
TRINITY_DN9502_c0_g1	TRINITY_DN9502_c0_g1_i1	AKA11_HUMAN	72.2	0
TRINITY_DN110_c1_g2	TRINITY_DN110_c1_g2_i5	SRCAP_HUMAN	84.3	0
TRINITY_DN110_c1_g1	TRINITY_DN110_c1_g1_i9	SRCAP_HUMAN	84.3	0
TRINITY_DN34494_c0_g1	TRINITY_DN34494_c0_g1_i2	F135B_MOUSE	87.2	0
TRINITY_DN4789_c1_g1	TRINITY_DN4789_c1_g1_i8	AT8B1_MOUSE	96.6	0
TRINITY_DN1156_c2_g1	TRINITY_DN1156_c2_g1_i3	RPB2_HUMAN	100	0
TRINITY_DN1349_c1_g1	TRINITY_DN1349_c1_g1_i5	RFX7_HUMAN	92.1	0
TRINITY_DN3298_c0_g2	TRINITY_DN3298_c0_g2_i3	SVIL_MOUSE	80.2	0
TRINITY_DN101836_c0_g1	TRINITY_DN101836_c0_g1_i4	K2022_RAT	86.6	0
TRINITY_DN3778_c2_g1	TRINITY_DN3778_c2_g1_i18	NPC1_MOUSE	90.8	0
TRINITY_DN668_c1_g1	TRINITY_DN668_c1_g1_i9	AOXA_RAT	81.1	0
TRINITY_DN6262_c0_g1	TRINITY_DN6262_c0_g1_i8	CAPS2_HUMAN	95.7	0
TRINITY_DN18340_c0_g1	TRINITY_DN18340_c0_g1_i14	IGDC4_MOUSE	93.8	0
TRINITY_DN13426_c0_g1	TRINITY_DN13426_c0_g1_i1	STAG2_MOUSE	99.4	0
TRINITY_DN103_c0_g1	TRINITY_DN103_c0_g1_i8	ARH40_MOUSE	90.2	0
TRINITY_DN2184_c0_g1	TRINITY_DN2184_c0_g1_i12	WDR35_RAT	98.6	0
TRINITY_DN1346_c1_g1	TRINITY_DN1346_c1_g1_i6	RHG31_MOUSE	86.3	0
TRINITY_DN5402_c0_g1	TRINITY_DN5402_c0_g1_i7	LMTK2_MOUSE	84.3	0
TRINITY_DN560_c0_g1	TRINITY_DN560_c0_g1_i2	ATS2_MOUSE	94.9	0
TRINITY_DN2273_c0_g1	TRINITY_DN2273_c0_g1_i6	CND1_MOUSE	89.1	0
TRINITY_DN33381_c0_g1	TRINITY_DN33381_c0_g1_i2	ATS18_MOUSE	92.9	0
TRINITY_DN5606_c0_g1	TRINITY_DN5606_c0_g1_i1	EFCB6_MOUSE	78.6	0
TRINITY_DN4224_c0_g5	TRINITY_DN4224_c0_g5_i3	ANR17_HUMAN	97.1	0
TRINITY_DN4435_c0_g1	TRINITY_DN4435_c0_g1_i2	CE295_MOUSE	70	0
TRINITY_DN2987_c1_g1	TRINITY_DN2987_c1_g1_i7	SBNO1_MOUSE	97	0
TRINITY_DN3008_c0_g1	TRINITY_DN3008_c0_g1_i15	PAN2_HUMAN	95.5	0
TRINITY_DN1145_c0_g1	TRINITY_DN1145_c0_g1_i4	WDR19_MOUSE	80	0
TRINITY_DN139_c0_g1	TRINITY_DN139_c0_g1_i14	UBP19_MOUSE	94.5	0
TRINITY_DN2791_c0_g1	TRINITY_DN2791_c0_g1_i11	SF3B1_HUMAN	99.8	0
TRINITY_DN3207_c0_g1	TRINITY_DN3207_c0_g1_i7	TT21B_MOUSE	94.4	0
TRINITY_DN48541_c0_g3	TRINITY_DN48541_c0_g3_i3	FRPD4_MOUSE	94.3	0
TRINITY_DN2829_c0_g1	TRINITY_DN2829_c0_g1_i2	SOS1_HUMAN	97.9	0
TRINITY_DN6089_c1_g1	TRINITY_DN6089_c1_g1_i4	SHAN1_MOUSE	83.9	0
TRINITY_DN7081_c0_g1	TRINITY_DN7081_c0_g1_i8	CTTB2_MOUSE	90.8	0
TRINITY_DN75_c1_g1	TRINITY_DN75_c1_g1_i7	AT133_MOUSE	95.7	0
TRINITY_DN3607_c0_g1	TRINITY_DN3607_c0_g1_i4	TT21A_MOUSE	90.4	0
TRINITY_DN4691_c0_g4	TRINITY_DN4691_c0_g4_i3	ITA11_MOUSE	95.4	0
TRINITY_DN9065_c0_g1	TRINITY_DN9065_c0_g1_i10	TTC17_MOUSE	96.9	0
TRINITY_DN16473_c0_g1	TRINITY_DN16473_c0_g1_i13	PCX2_MOUSE	91.3	0
TRINITY_DN1085_c0_g1	TRINITY_DN1085_c0_g1_i9	BCL9_MOUSE	95.6	0
TRINITY_DN561_c1_g1	TRINITY_DN561_c1_g1_i21	CUL7_RAT	86.3	0
TRINITY_DN20286_c0_g1	TRINITY_DN20286_c0_g1_i4	LTBP1_RAT	95.8	0
TRINITY_DN3669_c0_g1	TRINITY_DN3669_c0_g1_i16	T131L_MOUSE	60	0
TRINITY_DN739_c1_g1	TRINITY_DN739_c1_g1_i1	BCR_MOUSE	97.1	0
TRINITY_DN6156_c0_g1	TRINITY_DN6156_c0_g1_i9	SYVC_MOUSE	89.8	0
TRINITY_DN23526_c0_g1	TRINITY_DN23526_c0_g1_i7	ARG28_RAT	90.2	0
TRINITY_DN1594_c0_g1	TRINITY_DN1594_c0_g1_i5	EDRF1_MOUSE	97.5	0
TRINITY_DN52805_c0_g1	TRINITY_DN52805_c0_g1_i13	ATS16_MOUSE	89.5	0
TRINITY_DN1501_c0_g1	TRINITY_DN1501_c0_g1_i11	AMRA1_MOUSE	96.4	0
TRINITY_DN4697_c0_g1	TRINITY_DN4697_c0_g1_i7	NOS3_MOUSE	95.8	0
TRINITY_DN428_c4_g5	TRINITY_DN428_c4_g5_i1	CILP1_MOUSE	94.4	0
TRINITY_DN3306_c0_g1	TRINITY_DN3306_c0_g1_i7	PYC_MOUSE	97.4	0
TRINITY_DN12678_c0_g1	TRINITY_DN12678_c0_g1_i1	URFB1_HUMAN	83.4	0
TRINITY_DN11084_c0_g1	TRINITY_DN11084_c0_g1_i22	NLRC5_MOUSE	75.1	0
TRINITY_DN5027_c0_g1	TRINITY_DN5027_c0_g1_i2	DSEL_MOUSE	91.4	0
TRINITY_DN2421_c0_g1	TRINITY_DN2421_c0_g1_i4	ZN608_MOUSE	90	0
TRINITY_DN1614_c0_g1	TRINITY_DN1614_c0_g1_i7	LAMC3_MOUSE	84.1	0
TRINITY_DN15541_c0_g1	TRINITY_DN15541_c0_g1_i5	MRP5_MOUSE	96.9	0
TRINITY_DN4781_c0_g1	TRINITY_DN4781_c0_g1_i1	STK36_MOUSE	89.8	0
TRINITY_DN9114_c1_g1	TRINITY_DN9114_c1_g1_i8	NCOA2_HUMAN	58.7	0
TRINITY_DN3057_c1_g1	TRINITY_DN3057_c1_g1_i4	CUX1_MOUSE	90.3	0
TRINITY_DN986_c0_g1	TRINITY_DN986_c0_g1_i10	CO3_RAT	75.4	0
TRINITY_DN2654_c0_g1	TRINITY_DN2654_c0_g1_i8	TTLL5_MOUSE	92.3	0
TRINITY_DN5927_c0_g1	TRINITY_DN5927_c0_g1_i1	A2ML1_HUMAN	78.1	0
TRINITY_DN4365_c0_g1	TRINITY_DN4365_c0_g1_i7	IGSF3_MOUSE	95.1	0
TRINITY_DN2816_c0_g1	TRINITY_DN2816_c0_g1_i17	M3K6_MOUSE	90.6	0
TRINITY_DN87743_c0_g1	TRINITY_DN87743_c0_g1_i1	PCDH9_HUMAN	96.1	0
TRINITY_DN632_c0_g1	TRINITY_DN632_c0_g1_i1	SOS2_MOUSE	93.9	0
TRINITY_DN3277_c1_g1	TRINITY_DN3277_c1_g1_i3	BAZ1A_MOUSE	86.8	0
TRINITY_DN2258_c1_g1	TRINITY_DN2258_c1_g1_i8	RPC2_MOUSE	99.7	0
TRINITY_DN5409_c0_g1	TRINITY_DN5409_c0_g1_i8	PDS5B_MOUSE	95.4	0
TRINITY_DN5666_c1_g1	TRINITY_DN5666_c1_g1_i7	PARD3_MOUSE	93.9	0
TRINITY_DN683_c0_g1	TRINITY_DN683_c0_g1_i31	DHX30_MOUSE	93.7	0
TRINITY_DN16745_c0_g1	TRINITY_DN16745_c0_g1_i24	CAND1_RAT	99.8	0
TRINITY_DN1648_c0_g1	TRINITY_DN1648_c0_g1_i27	RN123_MOUSE	81.7	0
TRINITY_DN3967_c1_g1	TRINITY_DN3967_c1_g1_i1	BCL9L_HUMAN	90.3	0
TRINITY_DN1951_c0_g1	TRINITY_DN1951_c0_g1_i2	BRWD1_MOUSE	93.9	0
TRINITY_DN641_c0_g2	TRINITY_DN641_c0_g2_i6	ASXL1_MOUSE	82.8	0
TRINITY_DN4495_c0_g1	TRINITY_DN4495_c0_g1_i8	NRCAM_RAT	92.6	0
TRINITY_DN509_c1_g1	TRINITY_DN509_c1_g1_i17	POGZ_MOUSE	90.6	0
TRINITY_DN1535_c0_g1	TRINITY_DN1535_c0_g1_i1	FANCI_MOUSE	88.5	0
TRINITY_DN2986_c0_g1	TRINITY_DN2986_c0_g1_i7	LTBP2_MOUSE	85	0
TRINITY_DN3185_c0_g1	TRINITY_DN3185_c0_g1_i9	PASK_MOUSE	83	0
TRINITY_DN463_c0_g1	TRINITY_DN463_c0_g1_i7	KMT2D_MOUSE	92.8	0
TRINITY_DN5429_c0_g2	TRINITY_DN5429_c0_g2_i2	UBP40_MOUSE	90.7	0
TRINITY_DN1138_c3_g1	TRINITY_DN1138_c3_g1_i1	VCIP1_RAT	95.9	0
TRINITY_DN979_c0_g1	TRINITY_DN979_c0_g1_i30	CO4_RAT	84.1	0
TRINITY_DN33639_c1_g1	TRINITY_DN33639_c1_g1_i1	ABCBB_RAT	86.5	0
TRINITY_DN6074_c1_g1	TRINITY_DN6074_c1_g1_i10	DDB1_HUMAN	99.6	0
TRINITY_DN3368_c0_g2	TRINITY_DN3368_c0_g2_i18	KMT2B_MOUSE	94.3	0
TRINITY_DN31612_c0_g1	TRINITY_DN31612_c0_g1_i1	Z518A_MOUSE	78.9	0
TRINITY_DN508_c0_g2	TRINITY_DN508_c0_g2_i1	LR16A_MOUSE	89.7	0
TRINITY_DN34332_c0_g2	TRINITY_DN34332_c0_g2_i4	TPPC9_MOUSE	97.2	0
TRINITY_DN8143_c0_g1	TRINITY_DN8143_c0_g1_i4	SHRM2_MOUSE	80.2	0
TRINITY_DN287_c0_g1	TRINITY_DN287_c0_g1_i8	ANR12_HUMAN	80.1	0
TRINITY_DN6447_c0_g1	TRINITY_DN6447_c0_g1_i1	AGRA3_MOUSE	94.8	0
TRINITY_DN566_c0_g2	TRINITY_DN566_c0_g2_i12	OPLA_RAT	67.7	0
TRINITY_DN4181_c0_g1	TRINITY_DN4181_c0_g1_i1	INT2_MOUSE	96.8	0
TRINITY_DN6943_c1_g1	TRINITY_DN6943_c1_g1_i5	FND3B_MOUSE	93.1	0
TRINITY_DN5417_c0_g1	TRINITY_DN5417_c0_g1_i17	ITSN2_MOUSE	93.8	0
TRINITY_DN6181_c0_g1	TRINITY_DN6181_c0_g1_i1	MTMR4_MOUSE	91.4	0
TRINITY_DN1993_c0_g1	TRINITY_DN1993_c0_g1_i19	PITM1_RAT	84.1	0
TRINITY_DN4691_c0_g3	TRINITY_DN4691_c0_g3_i2	ITA1_MOUSE	94.4	0
TRINITY_DN6115_c1_g2	TRINITY_DN6115_c1_g2_i1	AT8A2_MOUSE	97.5	0
TRINITY_DN6362_c0_g1	TRINITY_DN6362_c0_g1_i4	RGRF2_RAT	97.2	0
TRINITY_DN17668_c0_g1	TRINITY_DN17668_c0_g1_i12	RPA2_MOUSE	94.4	0
TRINITY_DN385_c0_g1	TRINITY_DN385_c0_g1_i1	SCAP_RAT	83.5	0
TRINITY_DN3676_c2_g1	TRINITY_DN3676_c2_g1_i6	NPAT_MOUSE	86	0
TRINITY_DN3634_c0_g1	TRINITY_DN3634_c0_g1_i12	STRUM_MOUSE	98.1	0
TRINITY_DN4191_c0_g1	TRINITY_DN4191_c0_g1_i14	SEM5B_MOUSE	96.4	0
TRINITY_DN1752_c0_g1	TRINITY_DN1752_c0_g1_i9	ARHGA_MOUSE	90.6	0
TRINITY_DN12131_c0_g1	TRINITY_DN12131_c0_g1_i3	OVOS_MOUSE	76.4	0
TRINITY_DN5622_c0_g1	TRINITY_DN5622_c0_g1_i8	ANR11_HUMAN	74.2	0
TRINITY_DN3169_c5_g1	TRINITY_DN3169_c5_g1_i1	SYLC_MOUSE	93	0
TRINITY_DN4460_c0_g1	TRINITY_DN4460_c0_g1_i1	MDR1_CRIGR	92.9	0
TRINITY_DN354_c6_g1	TRINITY_DN354_c6_g1_i9	FNIP1_MOUSE	95.9	0
TRINITY_DN972_c0_g1	TRINITY_DN972_c0_g1_i18	AGRF5_RAT	85.2	0
TRINITY_DN2436_c0_g1	TRINITY_DN2436_c0_g1_i7	TAF2_HUMAN	95.9	0
TRINITY_DN75264_c0_g16	TRINITY_DN75264_c0_g16_i1	YPHG_ECOLI	99.3	0
TRINITY_DN1115_c0_g2	TRINITY_DN1115_c0_g2_i1	MRP4_HUMAN	85.7	0
TRINITY_DN2283_c2_g1	TRINITY_DN2283_c2_g1_i1	ROCK1_MOUSE	98	0
TRINITY_DN7148_c0_g1	TRINITY_DN7148_c0_g1_i16	MA2A2_MOUSE	94.2	0
TRINITY_DN31752_c0_g1	TRINITY_DN31752_c0_g1_i4	AT135_MOUSE	90.9	0
TRINITY_DN676_c1_g1	TRINITY_DN676_c1_g1_i2	PCD17_HUMAN	97.4	0
TRINITY_DN2606_c2_g1	TRINITY_DN2606_c2_g1_i8	IQEC2_MOUSE	96.9	0
TRINITY_DN4134_c0_g1	TRINITY_DN4134_c0_g1_i9	AT8A1_MOUSE	96.7	0
TRINITY_DN421_c0_g2	TRINITY_DN421_c0_g2_i2	RPRD2_MOUSE	90.3	0
TRINITY_DN378_c0_g1	TRINITY_DN378_c0_g1_i4	AT2B1_MOUSE	94	0
TRINITY_DN3702_c1_g1	TRINITY_DN3702_c1_g1_i3	AT10B_HUMAN	80.3	0
TRINITY_DN490_c1_g2	TRINITY_DN490_c1_g2_i3	TPC11_MOUSE	96	0
TRINITY_DN5301_c0_g1	TRINITY_DN5301_c0_g1_i4	ULK4_MOUSE	90.2	0
TRINITY_DN179_c0_g1	TRINITY_DN179_c0_g1_i17	DHX9_MOUSE	98.3	0
TRINITY_DN1166_c0_g1	TRINITY_DN1166_c0_g1_i4	KDM6B_HUMAN	88.3	0
TRINITY_DN21522_c0_g2	TRINITY_DN21522_c0_g2_i19	AT134_MOUSE	93.4	0
TRINITY_DN1754_c3_g1	TRINITY_DN1754_c3_g1_i4	XPO4_MOUSE	99.2	0
TRINITY_DN3522_c0_g1	TRINITY_DN3522_c0_g1_i16	PTN21_RAT	94.7	0
TRINITY_DN6596_c1_g1	TRINITY_DN6596_c1_g1_i4	CLAP2_RAT	94.6	0
TRINITY_DN33203_c0_g1	TRINITY_DN33203_c0_g1_i7	HAIR_RAT	90.2	0
TRINITY_DN2348_c0_g1	TRINITY_DN2348_c0_g1_i8	AFAD_RAT	97	0
TRINITY_DN9975_c1_g1	TRINITY_DN9975_c1_g1_i4	PKHH2_HUMAN	87.3	0
TRINITY_DN2589_c7_g1	TRINITY_DN2589_c7_g1_i1	MYPN_MOUSE	89.1	0
TRINITY_DN3268_c0_g1	TRINITY_DN3268_c0_g1_i10	UBP47_MOUSE	90.7	0
TRINITY_DN29638_c0_g1	TRINITY_DN29638_c0_g1_i1	PHLP1_MOUSE	88.2	0
TRINITY_DN6019_c0_g2	TRINITY_DN6019_c0_g2_i3	ASPM_MOUSE	72.6	0
TRINITY_DN3891_c0_g1	TRINITY_DN3891_c0_g1_i6	DHX8_MOUSE	98.6	0
TRINITY_DN8706_c1_g1	TRINITY_DN8706_c1_g1_i4	WRN_MOUSE	80.7	0
TRINITY_DN62_c0_g1	TRINITY_DN62_c0_g1_i14	MED12_MOUSE	58.1	0
TRINITY_DN3336_c0_g1	TRINITY_DN3336_c0_g1_i4	MTMR3_MOUSE	94.7	0
TRINITY_DN281_c0_g1	TRINITY_DN281_c0_g1_i22	TBCD4_MOUSE	88.3	0
TRINITY_DN2112_c0_g1	TRINITY_DN2112_c0_g1_i9	MMS22_MOUSE	88.8	0
TRINITY_DN1329_c0_g1	TRINITY_DN1329_c0_g1_i4	HEPH_MOUSE	89.9	0
TRINITY_DN612_c0_g1	TRINITY_DN612_c0_g1_i5	DAB2P_MOUSE	98.5	0
TRINITY_DN6148_c0_g1	TRINITY_DN6148_c0_g1_i3	NCKP1_MOUSE	99.9	0
TRINITY_DN18212_c1_g1	TRINITY_DN18212_c1_g1_i1	CAR11_MOUSE	97.8	0
TRINITY_DN17854_c0_g2	TRINITY_DN17854_c0_g2_i8	A2MG_RAT	75.5	0
TRINITY_DN1484_c0_g1	TRINITY_DN1484_c0_g1_i14	ACLY_MOUSE	99.6	0
TRINITY_DN12763_c0_g1	TRINITY_DN12763_c0_g1_i7	CBPC1_MOUSE	92.3	0
TRINITY_DN2432_c0_g1	TRINITY_DN2432_c0_g1_i18	KDM2B_MOUSE	93.3	0
TRINITY_DN869_c0_g1	TRINITY_DN869_c0_g1_i9	RNC_MOUSE	95.1	0
TRINITY_DN7273_c0_g1	TRINITY_DN7273_c0_g1_i9	GNPTA_MOUSE	87.1	0
TRINITY_DN16658_c0_g1	TRINITY_DN16658_c0_g1_i5	PK3CA_MOUSE	99.5	0
TRINITY_DN3107_c0_g1	TRINITY_DN3107_c0_g1_i13	CT194_MOUSE	90.9	0
TRINITY_DN252_c0_g1	TRINITY_DN252_c0_g1_i11	N4BP2_HUMAN	68.3	0
TRINITY_DN867_c0_g2	TRINITY_DN867_c0_g2_i3	S12A6_MOUSE	98.8	0
TRINITY_DN4767_c0_g1	TRINITY_DN4767_c0_g1_i7	UBE4B_MOUSE	97.5	0
TRINITY_DN1898_c0_g1	TRINITY_DN1898_c0_g1_i4	CO7A1_MOUSE	87.8	0
TRINITY_DN2566_c2_g2	TRINITY_DN2566_c2_g2_i5	TET2_HUMAN	63.5	0
TRINITY_DN196_c0_g1	TRINITY_DN196_c0_g1_i19	MAST3_MOUSE	94.2	0
TRINITY_DN1592_c0_g1	TRINITY_DN1592_c0_g1_i20	SETD5_HUMAN	91	0
TRINITY_DN21965_c0_g1	TRINITY_DN21965_c0_g1_i5	CENPE_MOUSE	65.2	0
TRINITY_DN4025_c1_g1	TRINITY_DN4025_c1_g1_i1	SORC1_MOUSE	95.9	0
TRINITY_DN12570_c0_g1	TRINITY_DN12570_c0_g1_i5	PK3CG_MOUSE	97.3	0
TRINITY_DN5686_c0_g1	TRINITY_DN5686_c0_g1_i4	ATP9B_MOUSE	97.6	0
TRINITY_DN15698_c0_g1	TRINITY_DN15698_c0_g1_i6	FOG2_MOUSE	94.1	0
TRINITY_DN6467_c0_g5	TRINITY_DN6467_c0_g5_i1	CAND2_MOUSE	95.3	0
TRINITY_DN2969_c0_g1	TRINITY_DN2969_c0_g1_i12	WIZ_MOUSE	72.4	0
TRINITY_DN6218_c0_g1	TRINITY_DN6218_c0_g1_i5	KCMA1_HUMAN	99.1	0
TRINITY_DN11756_c0_g1	TRINITY_DN11756_c0_g1_i5	BRCA1_RAT	67.6	0
TRINITY_DN7597_c0_g1	TRINITY_DN7597_c0_g1_i1	RHG29_MOUSE	88.5	0
TRINITY_DN8747_c0_g1	TRINITY_DN8747_c0_g1_i14	ARGAL_MOUSE	92	0
TRINITY_DN27259_c0_g1	TRINITY_DN27259_c0_g1_i3	CD109_HUMAN	76.4	0
TRINITY_DN5104_c1_g1	TRINITY_DN5104_c1_g1_i5	XPO6_MOUSE	98.8	0
TRINITY_DN242_c0_g1	TRINITY_DN242_c0_g1_i28	RPAP1_MOUSE	70	0
TRINITY_DN249_c0_g1	TRINITY_DN249_c0_g1_i16	SHIP1_RAT	92.8	0
TRINITY_DN7365_c0_g1	TRINITY_DN7365_c0_g1_i22	MAGI2_HUMAN	88.5	0
TRINITY_DN814_c3_g2	TRINITY_DN814_c3_g2_i4	TCPR2_HUMAN	81.8	0
TRINITY_DN3665_c0_g1	TRINITY_DN3665_c0_g1_i17	AT8B3_MOUSE	83.9	0
TRINITY_DN9558_c0_g1	TRINITY_DN9558_c0_g1_i13	ZSWM4_MOUSE	97.4	0
TRINITY_DN2752_c1_g1	TRINITY_DN2752_c1_g1_i4	KIF7_MOUSE	93.8	0
TRINITY_DN3686_c1_g1	TRINITY_DN3686_c1_g1_i1	CNDD3_MOUSE	78.7	0
TRINITY_DN9213_c0_g1	TRINITY_DN9213_c0_g1_i7	S12A5_HUMAN	98.1	0
TRINITY_DN807_c0_g1	TRINITY_DN807_c0_g1_i1	CC108_MOUSE	58.7	0
TRINITY_DN5925_c1_g2	TRINITY_DN5925_c1_g2_i4	DHX57_MOUSE	88.1	0
TRINITY_DN1786_c1_g1	TRINITY_DN1786_c1_g1_i4	CO6A4_MOUSE	78.7	0
TRINITY_DN346_c0_g1	TRINITY_DN346_c0_g1_i10	K1468_MOUSE	95.2	0
TRINITY_DN503_c2_g1	TRINITY_DN503_c2_g1_i2	BAIP3_MOUSE	94.2	0
TRINITY_DN13879_c1_g1	TRINITY_DN13879_c1_g1_i16	CAC1B_RAT	93.1	0
TRINITY_DN5941_c1_g1	TRINITY_DN5941_c1_g1_i16	IL16_MOUSE	89.3	0
TRINITY_DN2926_c0_g1	TRINITY_DN2926_c0_g1_i19	PTC2_MOUSE	94.3	0
TRINITY_DN745_c1_g1	TRINITY_DN745_c1_g1_i5	HIPK3_MOUSE	92	0
TRINITY_DN20729_c1_g1	TRINITY_DN20729_c1_g1_i2	SEM5A_RAT	96.7	0
TRINITY_DN372_c1_g1	TRINITY_DN372_c1_g1_i9	ABCA7_MOUSE	87	0
TRINITY_DN18223_c0_g1	TRINITY_DN18223_c0_g1_i4	PLCL2_MOUSE	98	0
TRINITY_DN552_c1_g2	TRINITY_DN552_c1_g2_i10	RC3H2_MOUSE	95	0
TRINITY_DN2467_c0_g2	TRINITY_DN2467_c0_g2_i1	GSLG1_MOUSE	99.1	0
TRINITY_DN2966_c0_g1	TRINITY_DN2966_c0_g1_i23	VIP2_HUMAN	91.8	0
TRINITY_DN12892_c0_g1	TRINITY_DN12892_c0_g1_i4	UBE2O_MOUSE	94.5	0
TRINITY_DN1252_c0_g1	TRINITY_DN1252_c0_g1_i8	CAMP2_MOUSE	93.2	0
TRINITY_DN929_c0_g1	TRINITY_DN929_c0_g1_i8	DEND3_MOUSE	91.6	0
TRINITY_DN16207_c0_g1	TRINITY_DN16207_c0_g1_i4	ZBED4_MOUSE	94.6	0
TRINITY_DN14559_c0_g2	TRINITY_DN14559_c0_g2_i7	CSMD2_HUMAN	84	0
TRINITY_DN1618_c0_g1	TRINITY_DN1618_c0_g1_i6	TNIK_MOUSE	98.6	0
TRINITY_DN8278_c1_g1	TRINITY_DN8278_c1_g1_i4	MYO1E_MOUSE	97.9	0
TRINITY_DN1144_c1_g1	TRINITY_DN1144_c1_g1_i4	WDR6_RAT	89.9	0
TRINITY_DN5661_c1_g1	TRINITY_DN5661_c1_g1_i5	NOS2_MOUSE	91.1	0
TRINITY_DN4375_c0_g1	TRINITY_DN4375_c0_g1_i22	TRPM4_RAT	90.2	0
TRINITY_DN13386_c0_g1	TRINITY_DN13386_c0_g1_i2	SCN7A_HUMAN	60.9	0
TRINITY_DN29141_c0_g1	TRINITY_DN29141_c0_g1_i3	PCD18_MOUSE	96.4	0
TRINITY_DN1770_c1_g1	TRINITY_DN1770_c1_g1_i20	DOT1L_HUMAN	80	0
TRINITY_DN264_c1_g1	TRINITY_DN264_c1_g1_i5	ITA6_MOUSE	97.3	0
TRINITY_DN2892_c0_g1	TRINITY_DN2892_c0_g1_i19	PPN_MOUSE	85.1	0
TRINITY_DN1656_c0_g1	TRINITY_DN1656_c0_g1_i1	DSRAD_RAT	91	0
TRINITY_DN613_c0_g1	TRINITY_DN613_c0_g1_i9	BIR1B_MOUSE	74.9	0
TRINITY_DN1647_c0_g1	TRINITY_DN1647_c0_g1_i3	TBCD_MOUSE	91.2	0
TRINITY_DN7607_c1_g1	TRINITY_DN7607_c1_g1_i7	NCHL1_MOUSE	86.4	0
TRINITY_DN7598_c0_g2	TRINITY_DN7598_c0_g2_i2	CA2D3_RAT	97.8	0
TRINITY_DN7627_c0_g1	TRINITY_DN7627_c0_g1_i6	CA2D1_MOUSE	98.5	0
TRINITY_DN37864_c0_g1	TRINITY_DN37864_c0_g1_i6	SGSM1_MOUSE	98.2	0
TRINITY_DN83_c0_g1	TRINITY_DN83_c0_g1_i12	WDR11_MOUSE	78.1	0
TRINITY_DN7249_c2_g1	TRINITY_DN7249_c2_g1_i3	BAZ1B_MOUSE	94.7	0
TRINITY_DN11997_c0_g1	TRINITY_DN11997_c0_g1_i5	CECR2_HUMAN	76.4	0
TRINITY_DN2235_c0_g1	TRINITY_DN2235_c0_g1_i9	KPBB_MOUSE	96.4	0
TRINITY_DN2171_c1_g2	TRINITY_DN2171_c1_g2_i7	SE1L3_MOUSE	93.3	0
TRINITY_DN3043_c0_g2	TRINITY_DN3043_c0_g2_i4	TBC8B_MOUSE	95.9	0
TRINITY_DN4715_c2_g2	TRINITY_DN4715_c2_g2_i3	SRGP3_MOUSE	99.6	0
TRINITY_DN2667_c0_g1	TRINITY_DN2667_c0_g1_i6	MYPC2_MOUSE	97.4	0
TRINITY_DN3280_c0_g2	TRINITY_DN3280_c0_g2_i11	TBC9B_MOUSE	94.4	0
TRINITY_DN53_c0_g1	TRINITY_DN53_c0_g1_i11	NCK5L_MOUSE	87.6	0
TRINITY_DN2089_c1_g1	TRINITY_DN2089_c1_g1_i4	HIPK1_HUMAN	97.3	0
TRINITY_DN396_c2_g2	TRINITY_DN396_c2_g2_i1	RC3H1_MOUSE	95	0
TRINITY_DN1753_c3_g1	TRINITY_DN1753_c3_g1_i3	ZN644_HUMAN	84.2	0
TRINITY_DN959_c1_g1	TRINITY_DN959_c1_g1_i14	CE152_MOUSE	69.1	0
TRINITY_DN2415_c0_g1	TRINITY_DN2415_c0_g1_i1	QSER1_HUMAN	78.1	0
TRINITY_DN5740_c0_g1	TRINITY_DN5740_c0_g1_i8	MBTP1_CRIGR	98.1	0
TRINITY_DN3526_c0_g1	TRINITY_DN3526_c0_g1_i4	APAF_RAT	93.3	0
TRINITY_DN10121_c0_g1	TRINITY_DN10121_c0_g1_i3	NOTC1_MOUSE	98.5	0
TRINITY_DN1206_c0_g1	TRINITY_DN1206_c0_g1_i11	SETB1_MOUSE	88.6	0
TRINITY_DN3236_c0_g1	TRINITY_DN3236_c0_g1_i9	SYNRG_RAT	89.5	0
TRINITY_DN2815_c0_g1	TRINITY_DN2815_c0_g1_i6	DAPLE_MOUSE	88.2	0
TRINITY_DN7945_c0_g1	TRINITY_DN7945_c0_g1_i19	MRP3_MOUSE	51.5	0
TRINITY_DN7110_c0_g1	TRINITY_DN7110_c0_g1_i4	NID1_MOUSE	92	0
TRINITY_DN1595_c0_g1	TRINITY_DN1595_c0_g1_i15	CUL9_HUMAN	73.9	0
TRINITY_DN9915_c0_g1	TRINITY_DN9915_c0_g1_i9	PK3CB_RAT	97.4	0
TRINITY_DN1814_c0_g1	TRINITY_DN1814_c0_g1_i7	ITA2_MOUSE	89.6	0
TRINITY_DN271_c1_g1	TRINITY_DN271_c1_g1_i24	AT8B2_MOUSE	97.6	0
TRINITY_DN29547_c0_g1	TRINITY_DN29547_c0_g1_i2	RET_RAT	91.8	0
TRINITY_DN2355_c1_g1	TRINITY_DN2355_c1_g1_i8	DGKH_MESAU	92.1	0
TRINITY_DN2636_c0_g1	TRINITY_DN2636_c0_g1_i21	TUT7_MOUSE	58.1	0
TRINITY_DN15618_c0_g2	TRINITY_DN15618_c0_g2_i1	FHOD3_MOUSE	82.8	0
TRINITY_DN33957_c0_g1	TRINITY_DN33957_c0_g1_i1	ZN536_MOUSE	92.1	0
TRINITY_DN22024_c0_g1	TRINITY_DN22024_c0_g1_i16	BNC2_MOUSE	96	0
TRINITY_DN3678_c0_g1	TRINITY_DN3678_c0_g1_i7	SEM6D_MOUSE	96.7	0
TRINITY_DN19686_c0_g2	TRINITY_DN19686_c0_g2_i2	GPR98_MOUSE	85.5	0
TRINITY_DN405_c1_g1	TRINITY_DN405_c1_g1_i9	AKIB1_MOUSE	95	0
TRINITY_DN4331_c0_g1	TRINITY_DN4331_c0_g1_i3	URB2_HUMAN	71.3	0
TRINITY_DN1516_c0_g1	TRINITY_DN1516_c0_g1_i7	ADNP_RAT	96.4	0
TRINITY_DN5272_c1_g1	TRINITY_DN5272_c1_g1_i12	MYO1F_HUMAN	94.1	0
TRINITY_DN1392_c1_g2	TRINITY_DN1392_c1_g2_i1	AT11C_MOUSE	95.8	0
TRINITY_DN6048_c2_g1	TRINITY_DN6048_c2_g1_i2	RNBP6_MOUSE	96.7	0
TRINITY_DN2123_c2_g1	TRINITY_DN2123_c2_g1_i8	NMDE3_RAT	93.1	0
TRINITY_DN3534_c0_g2	TRINITY_DN3534_c0_g2_i5	BRPF1_HUMAN	98.8	0
TRINITY_DN7828_c1_g1	TRINITY_DN7828_c1_g1_i2	MA2A1_MOUSE	89.7	0
TRINITY_DN1605_c0_g1	TRINITY_DN1605_c0_g1_i8	CNTRL_MOUSE	84.2	0
TRINITY_DN6498_c0_g1	TRINITY_DN6498_c0_g1_i4	BTBD7_MOUSE	96.2	0
TRINITY_DN14434_c0_g1	TRINITY_DN14434_c0_g1_i5	ZN516_MOUSE	92.1	0
TRINITY_DN35202_c0_g1	TRINITY_DN35202_c0_g1_i2	FGD5_MOUSE	90	0
TRINITY_DN17460_c0_g1	TRINITY_DN17460_c0_g1_i2	PLCL1_MOUSE	95.2	0
TRINITY_DN4943_c0_g1	TRINITY_DN4943_c0_g1_i22	LRP4_MOUSE	97.1	0
TRINITY_DN20050_c0_g1	TRINITY_DN20050_c0_g1_i7	STA13_MOUSE	92.7	0
TRINITY_DN3327_c0_g1	TRINITY_DN3327_c0_g1_i15	NCKPL_HUMAN	93.8	0
TRINITY_DN34817_c0_g1	TRINITY_DN34817_c0_g1_i7	TLL1_MOUSE	95.7	0
TRINITY_DN3165_c3_g1	TRINITY_DN3165_c3_g1_i5	SUCO_MOUSE	90.6	0
TRINITY_DN2029_c1_g2	TRINITY_DN2029_c1_g2_i13	SIK3_MOUSE	93.8	0
TRINITY_DN2805_c1_g1	TRINITY_DN2805_c1_g1_i1	FGD6_MOUSE	78.9	0
TRINITY_DN8025_c0_g1	TRINITY_DN8025_c0_g1_i2	ARI5B_MOUSE	90.2	0
TRINITY_DN3048_c9_g1	TRINITY_DN3048_c9_g1_i1	PRTG_RAT	91.8	0
TRINITY_DN18593_c0_g1	TRINITY_DN18593_c0_g1_i4	LAMC2_MOUSE	88.4	0
TRINITY_DN5563_c0_g1	TRINITY_DN5563_c0_g1_i4	SYNJ1_RAT	92.6	0
TRINITY_DN2247_c0_g1	TRINITY_DN2247_c0_g1_i2	TTLL4_MOUSE	90.2	0
TRINITY_DN15241_c0_g1	TRINITY_DN15241_c0_g1_i9	S4A10_MOUSE	96.2	0
TRINITY_DN4110_c0_g1	TRINITY_DN4110_c0_g1_i7	RREB1_MOUSE	81.8	0
TRINITY_DN94716_c0_g1	TRINITY_DN94716_c0_g1_i1	KIF14_HUMAN	70.8	0
TRINITY_DN665_c1_g1	TRINITY_DN665_c1_g1_i10	NCOR2_MOUSE	91.6	0
TRINITY_DN2859_c0_g2	TRINITY_DN2859_c0_g2_i1	S12A2_MOUSE	95	0
TRINITY_DN4790_c1_g1	TRINITY_DN4790_c1_g1_i9	KIF24_MOUSE	81	0
TRINITY_DN2714_c0_g1	TRINITY_DN2714_c0_g1_i6	SC16A_HUMAN	65.5	0
TRINITY_DN8960_c0_g1	TRINITY_DN8960_c0_g1_i14	RBP17_MOUSE	96	0
TRINITY_DN11599_c0_g1	TRINITY_DN11599_c0_g1_i6	ALPK3_MOUSE	75.4	0
TRINITY_DN5533_c1_g1	TRINITY_DN5533_c1_g1_i5	ADCY2_RAT	98.4	0
TRINITY_DN2787_c2_g1	TRINITY_DN2787_c2_g1_i6	UBE4A_RAT	98	0
TRINITY_DN7056_c0_g1	TRINITY_DN7056_c0_g1_i4	TPC10_MOUSE	97.3	0
TRINITY_DN6770_c0_g1	TRINITY_DN6770_c0_g1_i22	LMTK1_MOUSE	84.2	0
TRINITY_DN263_c2_g1	TRINITY_DN263_c2_g1_i6	PKHG1_HUMAN	78.2	0
TRINITY_DN1949_c0_g1	TRINITY_DN1949_c0_g1_i7	IF122_MOUSE	58.5	0
TRINITY_DN2089_c1_g3	TRINITY_DN2089_c1_g3_i1	HIPK2_MOUSE	97.3	0
TRINITY_DN4235_c0_g1	TRINITY_DN4235_c0_g1_i31	SF3B3_MOUSE	100	0
TRINITY_DN70_c0_g2	TRINITY_DN70_c0_g2_i1	IRS2_MOUSE	86.9	0
TRINITY_DN7385_c1_g1	TRINITY_DN7385_c1_g1_i5	TTBK2_MOUSE	91.6	0
TRINITY_DN1541_c0_g2	TRINITY_DN1541_c0_g2_i2	PGFRA_RAT	96.6	0
TRINITY_DN4453_c0_g1	TRINITY_DN4453_c0_g1_i2	FND3A_MOUSE	59.5	0
TRINITY_DN1704_c0_g1	TRINITY_DN1704_c0_g1_i16	JAK3_MOUSE	85	0
TRINITY_DN14732_c0_g1	TRINITY_DN14732_c0_g1_i7	SLX4_MOUSE	71.2	0
TRINITY_DN65376_c0_g1	TRINITY_DN65376_c0_g1_i2	ITA8_MOUSE	94.2	0
TRINITY_DN4093_c1_g1	TRINITY_DN4093_c1_g1_i4	PCD19_MOUSE	91.4	0
TRINITY_DN5046_c0_g1	TRINITY_DN5046_c0_g1_i1	NOL6_HUMAN	88.6	0
TRINITY_DN8622_c1_g1	TRINITY_DN8622_c1_g1_i2	STIL_MOUSE	83.2	0
TRINITY_DN66825_c0_g1	TRINITY_DN66825_c0_g1_i2	M10L1_MOUSE	88.3	0
TRINITY_DN2081_c0_g1	TRINITY_DN2081_c0_g1_i19	POL_XMRV6	64.9	0
TRINITY_DN87077_c0_g1	TRINITY_DN87077_c0_g1_i2	CNTN1_MOUSE	97.6	0
TRINITY_DN2428_c0_g1	TRINITY_DN2428_c0_g1_i8	FTM_MOUSE	88.9	0
TRINITY_DN2252_c0_g1	TRINITY_DN2252_c0_g1_i7	EGFR_MOUSE	91.9	0
TRINITY_DN1775_c0_g1	TRINITY_DN1775_c0_g1_i7	BLM_MOUSE	81.3	0
TRINITY_DN5035_c0_g1	TRINITY_DN5035_c0_g1_i6	CNTN4_MOUSE	98.4	0
TRINITY_DN129473_c0_g1	TRINITY_DN129473_c0_g1_i1	ATS17_HUMAN	87.9	0
TRINITY_DN1399_c0_g1	TRINITY_DN1399_c0_g1_i7	TBCD1_MOUSE	94	0
TRINITY_DN5341_c0_g1	TRINITY_DN5341_c0_g1_i1	PHLB2_MOUSE	94.2	0
TRINITY_DN7752_c0_g1	TRINITY_DN7752_c0_g1_i6	UBE3C_MOUSE	98.1	0
TRINITY_DN2570_c0_g1	TRINITY_DN2570_c0_g1_i5	ZN106_MOUSE	77.2	0
TRINITY_DN2384_c0_g1	TRINITY_DN2384_c0_g1_i7	ATAD2_HUMAN	86.3	0
TRINITY_DN27112_c0_g1	TRINITY_DN27112_c0_g1_i2	RBL1_MOUSE	96	0
TRINITY_DN5411_c0_g1	TRINITY_DN5411_c0_g1_i3	CK5P2_MOUSE	67.7	0
TRINITY_DN4546_c0_g1	TRINITY_DN4546_c0_g1_i18	CFA61_MOUSE	80.9	0
TRINITY_DN8987_c0_g1	TRINITY_DN8987_c0_g1_i30	S4A7_RAT	93.8	0
TRINITY_DN680_c0_g1	TRINITY_DN680_c0_g1_i5	KAT6B_MOUSE	87.3	0
TRINITY_DN3056_c1_g2	TRINITY_DN3056_c1_g2_i3	SEM6A_MOUSE	97.6	0
TRINITY_DN806_c2_g1	TRINITY_DN806_c2_g1_i8	DHX34_MOUSE	94.2	0
TRINITY_DN1757_c0_g1	TRINITY_DN1757_c0_g1_i2	ATP9A_MOUSE	99.5	0
TRINITY_DN5472_c0_g1	TRINITY_DN5472_c0_g1_i9	CDON_MOUSE	92.7	0
TRINITY_DN6684_c0_g1	TRINITY_DN6684_c0_g1_i21	KDM4A_MOUSE	96.1	0
TRINITY_DN1691_c0_g1	TRINITY_DN1691_c0_g1_i14	LATS1_HUMAN	93.4	0
TRINITY_DN6817_c0_g1	TRINITY_DN6817_c0_g1_i3	PCD12_MOUSE	89	0
TRINITY_DN6494_c0_g1	TRINITY_DN6494_c0_g1_i2	RGS22_MOUSE	83.6	0
TRINITY_DN466_c1_g1	TRINITY_DN466_c1_g1_i9	TBCD8_MOUSE	82.8	0
TRINITY_DN512_c0_g3	TRINITY_DN512_c0_g3_i8	EPHA7_RAT	99.5	0
TRINITY_DN2747_c2_g3	TRINITY_DN2747_c2_g3_i2	IRS1_MOUSE	91.2	0
TRINITY_DN58981_c0_g4	TRINITY_DN58981_c0_g4_i2	OTOF_RAT	96.3	0
TRINITY_DN10973_c0_g1	TRINITY_DN10973_c0_g1_i25	CNTN2_MOUSE	94.7	0
TRINITY_DN458_c0_g1	TRINITY_DN458_c0_g1_i3	TIE1_MOUSE	95.5	0
TRINITY_DN254_c1_g1	TRINITY_DN254_c1_g1_i1	DI3L1_RAT	95.5	0
TRINITY_DN1341_c1_g1	TRINITY_DN1341_c1_g1_i7	ZN532_HUMAN	83.8	0
TRINITY_DN19084_c0_g1	TRINITY_DN19084_c0_g1_i2	KI20B_MOUSE	71	0
TRINITY_DN15207_c0_g1	TRINITY_DN15207_c0_g1_i18	CFA46_HUMAN	74	0
TRINITY_DN26418_c0_g1	TRINITY_DN26418_c0_g1_i10	UBP31_HUMAN	89.6	0
TRINITY_DN956_c1_g1	TRINITY_DN956_c1_g1_i18	ADCY6_MOUSE	70	0
TRINITY_DN32476_c0_g4	TRINITY_DN32476_c0_g4_i1	DPO3A_ECOLI	99.9	0
TRINITY_DN1170_c0_g1	TRINITY_DN1170_c0_g1_i18	B3A2_MOUSE	97.5	0
TRINITY_DN20318_c0_g1	TRINITY_DN20318_c0_g1_i4	SORC2_MOUSE	96.8	0
TRINITY_DN5410_c0_g2	TRINITY_DN5410_c0_g2_i2	UBE3B_HUMAN	93.5	0
TRINITY_DN3478_c0_g1	TRINITY_DN3478_c0_g1_i2	GP126_MOUSE	85.6	0
TRINITY_DN123020_c0_g1	TRINITY_DN123020_c0_g1_i4	C163A_MOUSE	80.9	0
TRINITY_DN20988_c1_g1	TRINITY_DN20988_c1_g1_i3	CTND2_MOUSE	96.1	0
TRINITY_DN59123_c0_g2	TRINITY_DN59123_c0_g2_i5	CNTN3_MOUSE	96.3	0
TRINITY_DN1541_c0_g3	TRINITY_DN1541_c0_g3_i4	PGFRB_RAT	93.1	0
TRINITY_DN9617_c0_g1	TRINITY_DN9617_c0_g1_i16	SRGP2_MOUSE	98.4	0
TRINITY_DN11860_c0_g1	TRINITY_DN11860_c0_g1_i6	NCKP5_HUMAN	63.6	0
TRINITY_DN4643_c0_g1	TRINITY_DN4643_c0_g1_i4	S4A8_MOUSE	95.8	0
TRINITY_DN13853_c0_g1	TRINITY_DN13853_c0_g1_i19	ARAP3_MOUSE	66.3	0
TRINITY_DN2121_c1_g1	TRINITY_DN2121_c1_g1_i1	RBL2_MOUSE	92	0
TRINITY_DN3183_c1_g1	TRINITY_DN3183_c1_g1_i2	BRPF3_HUMAN	89.6	0
TRINITY_DN1295_c0_g2	TRINITY_DN1295_c0_g2_i1	FNDC1_RAT	73.1	0
TRINITY_DN6170_c0_g1	TRINITY_DN6170_c0_g1_i1	CNDG2_MOUSE	89.8	0
TRINITY_DN8096_c0_g1	TRINITY_DN8096_c0_g1_i3	UBP25_MOUSE	95.9	0
TRINITY_DN1988_c0_g2	TRINITY_DN1988_c0_g2_i2	UBA6_MOUSE	93.4	0
TRINITY_DN406_c0_g1	TRINITY_DN406_c0_g1_i10	EPHB6_RAT	97	0
TRINITY_DN2324_c0_g1	TRINITY_DN2324_c0_g1_i5	RIMB2_MOUSE	95.6	0
TRINITY_DN6158_c0_g2	TRINITY_DN6158_c0_g2_i4	SAC2_MOUSE	91.3	0
TRINITY_DN508_c0_g1	TRINITY_DN508_c0_g1_i23	LR16B_MOUSE	94	0
TRINITY_DN909_c0_g3	TRINITY_DN909_c0_g3_i1	RHG07_RAT	96	0
TRINITY_DN6170_c1_g1	TRINITY_DN6170_c1_g1_i3	S4A4_MOUSE	98.6	0
TRINITY_DN4071_c0_g1	TRINITY_DN4071_c0_g1_i6	PLCB4_RAT	98.6	0
TRINITY_DN14239_c0_g1	TRINITY_DN14239_c0_g1_i3	AT11A_MOUSE	95.1	0
TRINITY_DN4382_c1_g1	TRINITY_DN4382_c1_g1_i8	SK2L2_MOUSE	97.2	0
TRINITY_DN6637_c0_g1	TRINITY_DN6637_c0_g1_i23	PLCB3_MOUSE	90.9	0
TRINITY_DN3701_c0_g1	TRINITY_DN3701_c0_g1_i2	RGS12_MOUSE	95.7	0
TRINITY_DN6654_c0_g1	TRINITY_DN6654_c0_g1_i9	RPGF4_MOUSE	98.7	0
TRINITY_DN2810_c0_g1	TRINITY_DN2810_c0_g1_i27	MA2C1_MOUSE	84.6	0
TRINITY_DN14499_c0_g1	TRINITY_DN14499_c0_g1_i10	MYO3B_MOUSE	88.5	0
TRINITY_DN4360_c0_g1	TRINITY_DN4360_c0_g1_i13	GRIP1_MOUSE	96	0
TRINITY_DN214_c0_g1	TRINITY_DN214_c0_g1_i5	L2GL1_MOUSE	95.4	0
TRINITY_DN2787_c1_g1	TRINITY_DN2787_c1_g1_i8	NID2_MOUSE	59.7	0
TRINITY_DN1517_c3_g1	TRINITY_DN1517_c3_g1_i2	SCN8A_RAT	90.1	0
TRINITY_DN3945_c0_g1	TRINITY_DN3945_c0_g1_i32	SYVM_MOUSE	91.1	0
TRINITY_DN10874_c0_g1	TRINITY_DN10874_c0_g1_i10	LAMB3_MOUSE	87.4	0
TRINITY_DN10_c0_g1	TRINITY_DN10_c0_g1_i1	PTN14_MOUSE	94.4	0
TRINITY_DN1718_c0_g1	TRINITY_DN1718_c0_g1_i2	ESYT1_MOUSE	93.2	0
TRINITY_DN1818_c0_g1	TRINITY_DN1818_c0_g1_i13	S3TC2_MOUSE	90.6	0
TRINITY_DN2024_c1_g1	TRINITY_DN2024_c1_g1_i2	CRIM1_MOUSE	96.3	0
TRINITY_DN56386_c1_g1	TRINITY_DN56386_c1_g1_i6	RHG20_RAT	87.5	0
TRINITY_DN20239_c0_g1	TRINITY_DN20239_c0_g1_i8	KIF27_MOUSE	81.4	0
TRINITY_DN333_c0_g1	TRINITY_DN333_c0_g1_i11	M3K1_MOUSE	67.5	0
TRINITY_DN8322_c0_g1	TRINITY_DN8322_c0_g1_i8	AT11B_HUMAN	94.5	0
TRINITY_DN3658_c0_g1	TRINITY_DN3658_c0_g1_i6	IDE_RAT	97.4	0
TRINITY_DN4464_c0_g1	TRINITY_DN4464_c0_g1_i5	NINL_MOUSE	81.5	0
TRINITY_DN512_c0_g4	TRINITY_DN512_c0_g4_i1	EPHA4_MOUSE	99.4	0
TRINITY_DN3230_c0_g1	TRINITY_DN3230_c0_g1_i4	ATS14_HUMAN	79	0
TRINITY_DN33855_c0_g1	TRINITY_DN33855_c0_g1_i1	DPYD_MOUSE	94.2	0
TRINITY_DN6737_c0_g2	TRINITY_DN6737_c0_g2_i2	RYR1_MOUSE	96	0
TRINITY_DN6291_c0_g1	TRINITY_DN6291_c0_g1_i13	ASAP1_RAT	98.5	0
TRINITY_DN50632_c1_g1	TRINITY_DN50632_c1_g1_i3	CNTN6_RAT	94.9	0
TRINITY_DN1491_c0_g3	TRINITY_DN1491_c0_g3_i3	OTUD4_MOUSE	92.3	0
TRINITY_DN7251_c0_g1	TRINITY_DN7251_c0_g1_i4	NNTM_MOUSE	96.9	0
TRINITY_DN3908_c0_g1	TRINITY_DN3908_c0_g1_i4	NHSL1_MOUSE	79.9	0
TRINITY_DN4025_c0_g1	TRINITY_DN4025_c0_g1_i9	CDK12_RAT	94.3	0
TRINITY_DN3468_c1_g1	TRINITY_DN3468_c1_g1_i7	ETUD1_MOUSE	93.8	0
TRINITY_DN19232_c0_g1	TRINITY_DN19232_c0_g1_i6	MYO1D_RAT	97.9	0
TRINITY_DN6518_c0_g1	TRINITY_DN6518_c0_g1_i1	TIE2_MOUSE	94	0
TRINITY_DN7317_c0_g3	TRINITY_DN7317_c0_g3_i3	ATP4A_MOUSE	98.6	0
TRINITY_DN417_c0_g1	TRINITY_DN417_c0_g1_i7	ULK2_MOUSE	96.3	0
TRINITY_DN10142_c0_g1	TRINITY_DN10142_c0_g1_i6	PCX4_MOUSE	84.1	0
TRINITY_DN8486_c0_g1	TRINITY_DN8486_c0_g1_i1	PTK7_MOUSE	95.2	0
TRINITY_DN11113_c0_g1	TRINITY_DN11113_c0_g1_i7	ZFAT_MOUSE	90.7	0
TRINITY_DN19694_c0_g2	TRINITY_DN19694_c0_g2_i7	DGLA_MOUSE	99	0
TRINITY_DN5660_c0_g1	TRINITY_DN5660_c0_g1_i6	TONSL_MOUSE	84.8	0
TRINITY_DN4144_c0_g1	TRINITY_DN4144_c0_g1_i10	ZN592_MOUSE	90.5	0
TRINITY_DN1239_c1_g1	TRINITY_DN1239_c1_g1_i2	XPO1_MOUSE	97.4	0
TRINITY_DN2086_c0_g3	TRINITY_DN2086_c0_g3_i1	UBP48_RAT	95.9	0
TRINITY_DN5976_c0_g1	TRINITY_DN5976_c0_g1_i1	MN1_MOUSE	89.6	0
TRINITY_DN8012_c1_g1	TRINITY_DN8012_c1_g1_i5	GUC2C_RAT	90.5	0
TRINITY_DN4973_c0_g1	TRINITY_DN4973_c0_g1_i5	ADCY7_MOUSE	91.4	0
TRINITY_DN271_c0_g1	TRINITY_DN271_c0_g1_i6	AT1A2_MOUSE	99.8	0
TRINITY_DN546_c1_g1	TRINITY_DN546_c1_g1_i5	LR16C_HUMAN	84	0
TRINITY_DN491_c2_g6	TRINITY_DN491_c2_g6_i1	ATS15_MOUSE	98.1	0
TRINITY_DN3806_c0_g1	TRINITY_DN3806_c0_g1_i12	TDRD7_MOUSE	91	0
TRINITY_DN14619_c0_g1	TRINITY_DN14619_c0_g1_i7	NOMO1_MOUSE	96.6	0
TRINITY_DN6476_c2_g1	TRINITY_DN6476_c2_g1_i1	T132C_MOUSE	90.9	0
TRINITY_DN4605_c0_g2	TRINITY_DN4605_c0_g2_i1	KLOTB_MOUSE	88.9	0
TRINITY_DN14712_c0_g1	TRINITY_DN14712_c0_g1_i4	LMTK3_MOUSE	89.6	0
TRINITY_DN5975_c1_g1	TRINITY_DN5975_c1_g1_i6	BMPR2_MOUSE	96.9	0
TRINITY_DN5218_c0_g1	TRINITY_DN5218_c0_g1_i11	TALD3_MOUSE	73.7	0
TRINITY_DN2987_c0_g1	TRINITY_DN2987_c0_g1_i15	RRP12_MOUSE	95.9	0
TRINITY_DN3056_c1_g1	TRINITY_DN3056_c1_g1_i9	ODO1_RAT	81.3	0
TRINITY_DN4018_c0_g1	TRINITY_DN4018_c0_g1_i1	CERU_MOUSE	86.4	0
TRINITY_DN12563_c0_g1	TRINITY_DN12563_c0_g1_i4	PREP_MOUSE	91.7	0
TRINITY_DN3552_c0_g1	TRINITY_DN3552_c0_g1_i7	FAK1_RAT	98.6	0
TRINITY_DN6360_c0_g1	TRINITY_DN6360_c0_g1_i17	FBX38_HUMAN	93	0
TRINITY_DN684_c1_g1	TRINITY_DN684_c1_g1_i8	TRIPB_HUMAN	75.5	0
TRINITY_DN2031_c0_g1	TRINITY_DN2031_c0_g1_i15	ANFY1_MOUSE	98.2	0
TRINITY_DN6605_c0_g1	TRINITY_DN6605_c0_g1_i1	ITA9_MOUSE	92.6	0
TRINITY_DN2408_c0_g1	TRINITY_DN2408_c0_g1_i2	PLCG1_RAT	79.4	0
TRINITY_DN2182_c2_g1	TRINITY_DN2182_c2_g1_i6	ROCK2_HUMAN	93.4	0
TRINITY_DN18684_c1_g1	TRINITY_DN18684_c1_g1_i7	GCSP_MOUSE	94.7	0
TRINITY_DN25057_c0_g3	TRINITY_DN25057_c0_g3_i12	KCNH3_RAT	96.2	0
TRINITY_DN21737_c0_g1	TRINITY_DN21737_c0_g1_i32	RPOM_MOUSE	82.7	0
TRINITY_DN53020_c0_g1	TRINITY_DN53020_c0_g1_i9	GRIP2_RAT	96.5	0
TRINITY_DN2791_c1_g1	TRINITY_DN2791_c1_g1_i14	GRDN_HUMAN	92.4	0
TRINITY_DN872_c0_g1	TRINITY_DN872_c0_g1_i11	ABCA4_MOUSE	66.1	0
TRINITY_DN2399_c0_g2	TRINITY_DN2399_c0_g2_i2	WDR59_HUMAN	96.3	0
TRINITY_DN30_c0_g1	TRINITY_DN30_c0_g1_i5	CFAH_MOUSE	69.9	0
TRINITY_DN4507_c0_g1	TRINITY_DN4507_c0_g1_i7	OGDHL_HUMAN	94	0
TRINITY_DN18079_c2_g1	TRINITY_DN18079_c2_g1_i7	KLOT_MOUSE	91.9	0
TRINITY_DN622_c0_g1	TRINITY_DN622_c0_g1_i8	ELP1_MOUSE	77.9	0
TRINITY_DN7477_c0_g1	TRINITY_DN7477_c0_g1_i4	WDHD1_MOUSE	88.5	0
TRINITY_DN453_c0_g1	TRINITY_DN453_c0_g1_i1	MDGA2_HUMAN	98.8	0
TRINITY_DN1042_c0_g1	TRINITY_DN1042_c0_g1_i38	RTEL1_RAT	74	0
TRINITY_DN5578_c0_g1	TRINITY_DN5578_c0_g1_i32	GARL3_MOUSE	95.8	0
TRINITY_DN4218_c0_g1	TRINITY_DN4218_c0_g1_i19	CDK13_MOUSE	93.6	0
TRINITY_DN7744_c0_g1	TRINITY_DN7744_c0_g1_i3	TDRD1_MOUSE	82.1	0
TRINITY_DN4109_c1_g1	TRINITY_DN4109_c1_g1_i2	ITAM_MOUSE	83.7	0
TRINITY_DN6165_c0_g1	TRINITY_DN6165_c0_g1_i6	ANK3_MOUSE	90.5	0
TRINITY_DN10473_c0_g1	TRINITY_DN10473_c0_g1_i2	TRI66_MOUSE	87.9	0
TRINITY_DN23_c2_g1	TRINITY_DN23_c2_g1_i4	MOV10_MOUSE	91.3	0
TRINITY_DN5737_c1_g1	TRINITY_DN5737_c1_g1_i9	SC24A_MOUSE	93.8	0
TRINITY_DN878_c0_g1	TRINITY_DN878_c0_g1_i4	PDZD8_HUMAN	87.9	0
TRINITY_DN4306_c0_g1	TRINITY_DN4306_c0_g1_i6	MSH6_MOUSE	86.7	0
TRINITY_DN1187_c0_g1	TRINITY_DN1187_c0_g1_i1	K1324_MOUSE	93.9	0
TRINITY_DN4833_c0_g1	TRINITY_DN4833_c0_g1_i4	IPO7_MOUSE	99.5	0
TRINITY_DN5430_c0_g1	TRINITY_DN5430_c0_g1_i9	TTI1_MOUSE	91.8	0
TRINITY_DN187_c0_g1	TRINITY_DN187_c0_g1_i1	TP53B_MOUSE	48.3	0
TRINITY_DN107383_c0_g1	TRINITY_DN107383_c0_g1_i3	PHLP2_MOUSE	91.1	0
TRINITY_DN1611_c1_g2	TRINITY_DN1611_c1_g2_i2	EPHB2_MOUSE	97.3	0
TRINITY_DN8835_c1_g1	TRINITY_DN8835_c1_g1_i1	LRRC9_MOUSE	85.5	0
TRINITY_DN8464_c0_g1	TRINITY_DN8464_c0_g1_i8	NEBU_HUMAN	89.9	0
TRINITY_DN156_c2_g1	TRINITY_DN156_c2_g1_i1	ITA3_CRIGR	94.1	0
TRINITY_DN4725_c0_g4	TRINITY_DN4725_c0_g4_i3	FARP2_MOUSE	91.6	0
TRINITY_DN3300_c0_g2	TRINITY_DN3300_c0_g2_i6	TNR6A_HUMAN	45.5	0
TRINITY_DN146_c1_g1	TRINITY_DN146_c1_g1_i4	LBN_MOUSE	89.3	0
TRINITY_DN16873_c1_g1	TRINITY_DN16873_c1_g1_i2	FANCJ_MOUSE	82.9	0
TRINITY_DN2841_c0_g1	TRINITY_DN2841_c0_g1_i4	NFAT5_RAT	88.3	0
TRINITY_DN2713_c0_g1	TRINITY_DN2713_c0_g1_i4	FA83H_MOUSE	90.1	0
TRINITY_DN5379_c0_g3	TRINITY_DN5379_c0_g3_i3	SALL1_MOUSE	88.1	0
TRINITY_DN10325_c0_g2	TRINITY_DN10325_c0_g2_i9	GRIK5_MOUSE	99.8	0
TRINITY_DN803_c2_g1	TRINITY_DN803_c2_g1_i2	NRIP1_MOUSE	86.3	0
TRINITY_DN1166_c0_g3	TRINITY_DN1166_c0_g3_i1	BTBDB_MOUSE	97.8	0
TRINITY_DN8199_c0_g1	TRINITY_DN8199_c0_g1_i7	SSPO_RAT	82.5	0
TRINITY_DN13033_c0_g1	TRINITY_DN13033_c0_g1_i7	SMCA1_MOUSE	96.1	0
TRINITY_DN1773_c0_g1	TRINITY_DN1773_c0_g1_i1	XPO7_MOUSE	99.3	0
TRINITY_DN5802_c0_g1	TRINITY_DN5802_c0_g1_i2	EPHA3_RAT	95.1	0
TRINITY_DN237_c0_g3	TRINITY_DN237_c0_g3_i6	SGSM2_MOUSE	95.5	0
TRINITY_DN643_c0_g1	TRINITY_DN643_c0_g1_i5	PR14L_HUMAN	53.8	0
TRINITY_DN33626_c0_g2	TRINITY_DN33626_c0_g2_i10	HERC3_HUMAN	94.2	0
TRINITY_DN2625_c0_g1	TRINITY_DN2625_c0_g1_i18	PARP4_HUMAN	79.5	0
TRINITY_DN1866_c0_g1	TRINITY_DN1866_c0_g1_i4	ACD10_MOUSE	87.6	0
TRINITY_DN2270_c0_g1	TRINITY_DN2270_c0_g1_i12	NU214_MOUSE	75.3	0
TRINITY_DN3044_c0_g1	TRINITY_DN3044_c0_g1_i1	DZIP3_MOUSE	89.1	0
TRINITY_DN2346_c3_g1	TRINITY_DN2346_c3_g1_i1	KIF15_MOUSE	86.9	0
TRINITY_DN3094_c2_g2	TRINITY_DN3094_c2_g2_i3	TOP3A_MOUSE	93.1	0
TRINITY_DN1278_c1_g1	TRINITY_DN1278_c1_g1_i11	HMHA1_MOUSE	91.3	0
TRINITY_DN3888_c0_g1	TRINITY_DN3888_c0_g1_i7	TASOR_MOUSE	85.7	0
TRINITY_DN512_c0_g1	TRINITY_DN512_c0_g1_i2	EPHA2_MOUSE	96.4	0
TRINITY_DN1910_c0_g1	TRINITY_DN1910_c0_g1_i9	ANO4_MOUSE	98.7	0
TRINITY_DN7869_c0_g1	TRINITY_DN7869_c0_g1_i16	HMGX3_HUMAN	79.8	0
TRINITY_DN12775_c0_g4	TRINITY_DN12775_c0_g4_i3	SMG8_MOUSE	98.5	0
TRINITY_DN1378_c0_g1	TRINITY_DN1378_c0_g1_i7	NOTC2_HUMAN	94.5	0
TRINITY_DN2769_c2_g1	TRINITY_DN2769_c2_g1_i1	WAPL_MOUSE	93.5	0
TRINITY_DN152_c0_g2	TRINITY_DN152_c0_g2_i14	PK3CD_MOUSE	73.8	0
TRINITY_DN7545_c0_g1	TRINITY_DN7545_c0_g1_i22	BMS1_HUMAN	83.1	0
TRINITY_DN73713_c0_g1	TRINITY_DN73713_c0_g1_i12	RADIL_MOUSE	91.3	0
TRINITY_DN6312_c0_g1	TRINITY_DN6312_c0_g1_i5	MYOME_MOUSE	74.8	0
TRINITY_DN1148_c0_g1	TRINITY_DN1148_c0_g1_i1	ZN609_HUMAN	90.4	0
TRINITY_DN372_c0_g2	TRINITY_DN372_c0_g2_i3	TB182_MOUSE	79	0
TRINITY_DN3118_c0_g1	TRINITY_DN3118_c0_g1_i2	UBP38_MOUSE	93.2	0
TRINITY_DN1611_c1_g1	TRINITY_DN1611_c1_g1_i5	EPHB4_MOUSE	96.5	0
TRINITY_DN933_c0_g1	TRINITY_DN933_c0_g1_i4	RB3GP_MOUSE	95.6	0
TRINITY_DN78378_c0_g1	TRINITY_DN78378_c0_g1_i12	CNKR2_RAT	96.7	0
TRINITY_DN672_c0_g1	TRINITY_DN672_c0_g1_i2	L2GL2_MOUSE	83.1	0
TRINITY_DN5448_c0_g1	TRINITY_DN5448_c0_g1_i2	VIP1_RAT	88.2	0
TRINITY_DN338_c1_g1	TRINITY_DN338_c1_g1_i5	SMCA5_MOUSE	99.3	0
TRINITY_DN6143_c1_g1	TRINITY_DN6143_c1_g1_i4	PIGO_MOUSE	88.8	0
TRINITY_DN8015_c0_g1	TRINITY_DN8015_c0_g1_i5	KIF1C_MOUSE	93.2	0
TRINITY_DN1929_c0_g1	TRINITY_DN1929_c0_g1_i6	K0355_HUMAN	91.9	0
TRINITY_DN20385_c0_g1	TRINITY_DN20385_c0_g1_i1	PIWL2_MOUSE	95.5	0
TRINITY_DN125333_c0_g3	TRINITY_DN125333_c0_g3_i4	UNC5D_MOUSE	97.7	0
TRINITY_DN10477_c0_g1	TRINITY_DN10477_c0_g1_i2	AT2A3_MOUSE	96.1	0
TRINITY_DN4828_c0_g1	TRINITY_DN4828_c0_g1_i9	CE162_MOUSE	81.1	0
TRINITY_DN114_c0_g3	TRINITY_DN114_c0_g3_i1	GSC1L_MOUSE	91	0
TRINITY_DN1132_c1_g1	TRINITY_DN1132_c1_g1_i8	NAT10_MOUSE	96	0
TRINITY_DN582_c2_g1	TRINITY_DN582_c2_g1_i3	SPD2A_MOUSE	93.8	0
TRINITY_DN143_c0_g1	TRINITY_DN143_c0_g1_i34	JIP3_MOUSE	95.8	0
TRINITY_DN2391_c0_g1	TRINITY_DN2391_c0_g1_i4	F120C_MOUSE	92.3	0
TRINITY_DN611_c0_g2	TRINITY_DN611_c0_g2_i8	GSE1_MOUSE	94.2	0
TRINITY_DN6569_c1_g1	TRINITY_DN6569_c1_g1_i1	SIPA1_MOUSE	93.2	0
TRINITY_DN8115_c0_g1	TRINITY_DN8115_c0_g1_i6	AP4E1_MOUSE	88	0
TRINITY_DN102515_c1_g14	TRINITY_DN102515_c1_g14_i2	ENTF_ECOLI	99.6	0
TRINITY_DN1204_c3_g1	TRINITY_DN1204_c3_g1_i2	K0825_MOUSE	77.7	0
TRINITY_DN319_c1_g1	TRINITY_DN319_c1_g1_i1	JIP4_MOUSE	94.3	0
TRINITY_DN26923_c0_g9	TRINITY_DN26923_c0_g9_i1	PTRA_SHIFL	99.7	0
TRINITY_DN1250_c0_g1	TRINITY_DN1250_c0_g1_i3	RNF31_MOUSE	90.2	0
TRINITY_DN941_c0_g1	TRINITY_DN941_c0_g1_i7	NPHP3_MOUSE	92	0
TRINITY_DN3131_c0_g1	TRINITY_DN3131_c0_g1_i14	SRBP2_MOUSE	95.1	0
TRINITY_DN5494_c0_g1	TRINITY_DN5494_c0_g1_i4	NCOA3_MOUSE	85.7	0
TRINITY_DN34166_c0_g3	TRINITY_DN34166_c0_g3_i4	KCNH1_RAT	98.8	0
TRINITY_DN41150_c0_g1	TRINITY_DN41150_c0_g1_i5	SCAPE_HUMAN	86.8	0
TRINITY_DN1138_c0_g1	TRINITY_DN1138_c0_g1_i5	CAMP3_MOUSE	74.1	0
TRINITY_DN3194_c0_g3	TRINITY_DN3194_c0_g3_i5	LIFR_MOUSE	82.8	0
TRINITY_DN5151_c0_g1	TRINITY_DN5151_c0_g1_i1	CC141_HUMAN	71.4	0
TRINITY_DN43976_c0_g1	TRINITY_DN43976_c0_g1_i5	MDGA1_RAT	96.4	0
TRINITY_DN5239_c0_g1	TRINITY_DN5239_c0_g1_i8	MSH3_MOUSE	88.1	0
TRINITY_DN1124_c0_g1	TRINITY_DN1124_c0_g1_i13	UBP42_MOUSE	82.6	0
TRINITY_DN4034_c0_g1	TRINITY_DN4034_c0_g1_i5	B3A3_MOUSE	79.2	0
TRINITY_DN12145_c0_g1	TRINITY_DN12145_c0_g1_i6	SH3B4_MOUSE	97.3	0
TRINITY_DN1831_c0_g1	TRINITY_DN1831_c0_g1_i1	IPO13_MOUSE	98.8	0
TRINITY_DN4035_c0_g1	TRINITY_DN4035_c0_g1_i15	EHMT1_MOUSE	95.6	0
TRINITY_DN186_c1_g1	TRINITY_DN186_c1_g1_i15	REV1_MOUSE	71.8	0
TRINITY_DN2366_c2_g1	TRINITY_DN2366_c2_g1_i15	ABL1_MOUSE	92.4	0
TRINITY_DN8931_c0_g1	TRINITY_DN8931_c0_g1_i5	CASC5_HUMAN	52.7	0
TRINITY_DN634_c2_g2	TRINITY_DN634_c2_g2_i9	PRC2B_HUMAN	50.5	0
TRINITY_DN2701_c2_g1	TRINITY_DN2701_c2_g1_i12	IREB2_RAT	96.4	0
TRINITY_DN3394_c0_g1	TRINITY_DN3394_c0_g1_i7	WDR33_MOUSE	95.1	0
TRINITY_DN10152_c1_g1	TRINITY_DN10152_c1_g1_i4	RENT2_HUMAN	94.8	0
TRINITY_DN1316_c0_g1	TRINITY_DN1316_c0_g1_i7	UBP43_MOUSE	88.4	0
TRINITY_DN1084_c1_g1	TRINITY_DN1084_c1_g1_i8	NED4L_MOUSE	97.4	0
TRINITY_DN1692_c0_g3	TRINITY_DN1692_c0_g3_i7	MRC1_MOUSE	50.8	0
TRINITY_DN6484_c0_g1	TRINITY_DN6484_c0_g1_i7	FN3C1_MOUSE	73.4	0
TRINITY_DN5097_c0_g1	TRINITY_DN5097_c0_g1_i4	SMC6_MOUSE	94.1	0
TRINITY_DN2512_c1_g1	TRINITY_DN2512_c1_g1_i4	PCDH1_HUMAN	94.3	0
TRINITY_DN19145_c0_g1	TRINITY_DN19145_c0_g1_i5	ZAN_MOUSE	60.7	0
TRINITY_DN2179_c0_g2	TRINITY_DN2179_c0_g2_i2	NRP2_MOUSE	95.8	0
TRINITY_DN1856_c1_g1	TRINITY_DN1856_c1_g1_i9	RBGP1_MOUSE	96.3	0
TRINITY_DN561_c0_g1	TRINITY_DN561_c0_g1_i7	PRDM2_RAT	87.7	0
TRINITY_DN19914_c0_g1	TRINITY_DN19914_c0_g1_i4	IPO11_MOUSE	97	0
TRINITY_DN4688_c0_g1	TRINITY_DN4688_c0_g1_i21	COBL_MOUSE	83.3	0
TRINITY_DN459_c0_g1	TRINITY_DN459_c0_g1_i6	ITA5_MOUSE	68.1	0
TRINITY_DN115_c0_g1	TRINITY_DN115_c0_g1_i5	NRK_MOUSE	71.7	0
TRINITY_DN1617_c0_g1	TRINITY_DN1617_c0_g1_i4	SYIM_MOUSE	89	0
TRINITY_DN14682_c1_g1	TRINITY_DN14682_c1_g1_i2	ITAL_MOUSE	81.6	0
TRINITY_DN2032_c0_g1	TRINITY_DN2032_c0_g1_i17	RECQ4_MOUSE	78.8	0
TRINITY_DN2114_c0_g1	TRINITY_DN2114_c0_g1_i10	F135A_MOUSE	78.2	0
TRINITY_DN7603_c3_g2	TRINITY_DN7603_c3_g2_i2	VPS18_HUMAN	94.9	0
TRINITY_DN1308_c0_g1	TRINITY_DN1308_c0_g1_i3	ANO1_MOUSE	98.1	0
TRINITY_DN3708_c2_g1	TRINITY_DN3708_c2_g1_i3	P2R3A_HUMAN	85.2	0
TRINITY_DN240_c2_g1	TRINITY_DN240_c2_g1_i2	PDE3A_MOUSE	89.7	0
TRINITY_DN1012_c0_g1	TRINITY_DN1012_c0_g1_i16	VPS11_HUMAN	97.4	0
TRINITY_DN3382_c0_g1	TRINITY_DN3382_c0_g1_i6	DNA2_MOUSE	88.3	0
TRINITY_DN27865_c1_g1	TRINITY_DN27865_c1_g1_i2	K132L_MOUSE	93.4	0
TRINITY_DN2984_c0_g1	TRINITY_DN2984_c0_g1_i17	WDR62_MOUSE	63.8	0
TRINITY_DN724_c2_g1	TRINITY_DN724_c2_g1_i10	YETS2_HUMAN	85.2	0
TRINITY_DN2936_c0_g1	TRINITY_DN2936_c0_g1_i6	SMC1A_MOUSE	100	0
TRINITY_DN612_c0_g2	TRINITY_DN612_c0_g2_i11	NGAP_HUMAN	95.6	0
TRINITY_DN4993_c0_g1	TRINITY_DN4993_c0_g1_i4	DNLI3_MOUSE	91.8	0
TRINITY_DN5525_c0_g1	TRINITY_DN5525_c0_g1_i4	GANAB_MOUSE	95.4	0
TRINITY_DN2295_c1_g1	TRINITY_DN2295_c1_g1_i2	NRP1_MOUSE	95.9	0
TRINITY_DN3813_c2_g1	TRINITY_DN3813_c2_g1_i1	PDE3B_MOUSE	90.7	0
TRINITY_DN3124_c0_g1	TRINITY_DN3124_c0_g1_i6	NEK1_MOUSE	83.4	0
TRINITY_DN1302_c0_g1	TRINITY_DN1302_c0_g1_i13	FMNL3_MOUSE	98.2	0
TRINITY_DN7535_c0_g1	TRINITY_DN7535_c0_g1_i3	B4GN4_MOUSE	92.2	0
TRINITY_DN21982_c0_g1	TRINITY_DN21982_c0_g1_i12	PRP16_HUMAN	97.6	0
TRINITY_DN63708_c0_g2	TRINITY_DN63708_c0_g2_i3	GUC2E_RAT	92.5	0
TRINITY_DN2419_c0_g1	TRINITY_DN2419_c0_g1_i26	LTBP4_MOUSE	79.3	0
TRINITY_DN596_c3_g1	TRINITY_DN596_c3_g1_i3	UBP4_MOUSE	95.1	0
TRINITY_DN65896_c0_g1	TRINITY_DN65896_c0_g1_i12	UNC5C_MOUSE	99.1	0
TRINITY_DN19892_c0_g1	TRINITY_DN19892_c0_g1_i11	JAK2_RAT	60.7	0
TRINITY_DN302_c1_g2	TRINITY_DN302_c1_g2_i1	CSKI1_MOUSE	96.1	0
TRINITY_DN5180_c1_g1	TRINITY_DN5180_c1_g1_i8	ANK1_MOUSE	90.5	0
TRINITY_DN339_c1_g1	TRINITY_DN339_c1_g1_i4	AP1B1_BOVIN	99.8	0
TRINITY_DN65_c1_g1	TRINITY_DN65_c1_g1_i14	WNK4_MOUSE	89.6	0
TRINITY_DN3002_c0_g1	TRINITY_DN3002_c0_g1_i11	U5S1_HUMAN	99.5	0
TRINITY_DN10951_c0_g1	TRINITY_DN10951_c0_g1_i6	RPC1_BOVIN	98.3	0
TRINITY_DN15991_c0_g2	TRINITY_DN15991_c0_g2_i6	RECK_MOUSE	94.9	0
TRINITY_DN4589_c0_g1	TRINITY_DN4589_c0_g1_i9	NLRP3_MOUSE	89	0
TRINITY_DN2736_c0_g1	TRINITY_DN2736_c0_g1_i3	TIF1A_MOUSE	94.4	0
TRINITY_DN272_c0_g1	TRINITY_DN272_c0_g1_i6	ZMYM3_MOUSE	48.4	0
TRINITY_DN567_c0_g1	TRINITY_DN567_c0_g1_i25	PKHA7_MOUSE	93.8	0
TRINITY_DN4027_c1_g4	TRINITY_DN4027_c1_g4_i3	SYNEM_MOUSE	73.9	0
TRINITY_DN7709_c0_g1	TRINITY_DN7709_c0_g1_i5	GRM7_PONAB	99.1	0
TRINITY_DN964_c1_g1	TRINITY_DN964_c1_g1_i6	AFF3_HUMAN	88.2	0
TRINITY_DN5080_c1_g2	TRINITY_DN5080_c1_g2_i3	XRN2_MOUSE	95.9	0
TRINITY_DN1884_c0_g1	TRINITY_DN1884_c0_g1_i11	MRP7_MOUSE	54.8	0
TRINITY_DN4852_c0_g1	TRINITY_DN4852_c0_g1_i9	OPA1_MOUSE	97.9	0
TRINITY_DN318_c1_g1	TRINITY_DN318_c1_g1_i6	TREF1_MOUSE	92.6	0
TRINITY_DN2009_c0_g1	TRINITY_DN2009_c0_g1_i7	SNX14_MOUSE	97.7	0
TRINITY_DN1164_c2_g1	TRINITY_DN1164_c2_g1_i2	PEG3_MOUSE	79	0
TRINITY_DN3567_c0_g1	TRINITY_DN3567_c0_g1_i1	MKS3_MOUSE	90.7	0
TRINITY_DN3585_c0_g1	TRINITY_DN3585_c0_g1_i4	TSP2_MOUSE	95	0
TRINITY_DN6024_c0_g1	TRINITY_DN6024_c0_g1_i4	PUR2_MOUSE	91.1	0
TRINITY_DN17208_c0_g1	TRINITY_DN17208_c0_g1_i3	MRO2A_MOUSE	70.5	0
TRINITY_DN4347_c0_g1	TRINITY_DN4347_c0_g1_i13	C2CD5_MOUSE	96.8	0
TRINITY_DN1899_c0_g3	TRINITY_DN1899_c0_g3_i2	PHF2_MOUSE	97.5	0
TRINITY_DN4053_c0_g1	TRINITY_DN4053_c0_g1_i5	HDAC4_MOUSE	98.4	0
TRINITY_DN4673_c0_g1	TRINITY_DN4673_c0_g1_i3	EXOC4_MOUSE	98.1	0
TRINITY_DN1174_c0_g1	TRINITY_DN1174_c0_g1_i4	ERN1_MOUSE	94.7	0
TRINITY_DN3967_c0_g1	TRINITY_DN3967_c0_g1_i3	MYPC1_HUMAN	91.3	0
TRINITY_DN9814_c0_g1	TRINITY_DN9814_c0_g1_i6	TNPO3_HUMAN	99.2	0
TRINITY_DN2426_c1_g1	TRINITY_DN2426_c1_g1_i2	FA65B_MOUSE	90.2	0
TRINITY_DN682_c0_g1	TRINITY_DN682_c0_g1_i2	XPOT_MOUSE	97.2	0
TRINITY_DN2360_c1_g1	TRINITY_DN2360_c1_g1_i12	ZO2_MOUSE	93.1	0
TRINITY_DN99706_c0_g2	TRINITY_DN99706_c0_g2_i1	TRPC4_MOUSE	96.4	0
TRINITY_DN145_c0_g1	TRINITY_DN145_c0_g1_i9	UBA1_RAT	67	0
TRINITY_DN23809_c0_g1	TRINITY_DN23809_c0_g1_i1	M3K19_MOUSE	74.1	0
TRINITY_DN1474_c6_g1	TRINITY_DN1474_c6_g1_i1	PTN4_MOUSE	96.5	0
TRINITY_DN10781_c0_g1	TRINITY_DN10781_c0_g1_i6	DSE_MOUSE	94.6	0
TRINITY_DN2350_c0_g1	TRINITY_DN2350_c0_g1_i1	PTPRG_MOUSE	74.2	0
TRINITY_DN3957_c0_g1	TRINITY_DN3957_c0_g1_i12	HPS5_MOUSE	73	0
TRINITY_DN8912_c0_g1	TRINITY_DN8912_c0_g1_i3	PCDH8_RAT	96.6	0
TRINITY_DN2012_c0_g1	TRINITY_DN2012_c0_g1_i5	INT8_MOUSE	80.1	0
TRINITY_DN4328_c0_g1	TRINITY_DN4328_c0_g1_i4	K319L_MOUSE	89.7	0
TRINITY_DN6382_c0_g1	TRINITY_DN6382_c0_g1_i21	IPO8_MOUSE	95.1	0
TRINITY_DN8192_c0_g2	TRINITY_DN8192_c0_g2_i21	ITA2B_MOUSE	87.3	0
TRINITY_DN1662_c1_g1	TRINITY_DN1662_c1_g1_i38	DNMBP_MOUSE	80.2	0
TRINITY_DN3728_c0_g1	TRINITY_DN3728_c0_g1_i2	CNTLN_MOUSE	80	0
TRINITY_DN1515_c0_g1	TRINITY_DN1515_c0_g1_i9	TUTLA_RAT	88	0
TRINITY_DN1575_c1_g1	TRINITY_DN1575_c1_g1_i11	TSC1_MOUSE	89.5	0
TRINITY_DN5525_c0_g2	TRINITY_DN5525_c0_g2_i6	RRP44_MOUSE	95.3	0
TRINITY_DN3211_c0_g1	TRINITY_DN3211_c0_g1_i13	JARD2_MOUSE	67.6	0
TRINITY_DN38899_c0_g1	TRINITY_DN38899_c0_g1_i1	MMRN1_MOUSE	79.4	0
TRINITY_DN2616_c1_g1	TRINITY_DN2616_c1_g1_i4	SYAC_MOUSE	97.2	0
TRINITY_DN10690_c0_g1	TRINITY_DN10690_c0_g1_i12	IPO9_MOUSE	98.3	0
TRINITY_DN6973_c0_g1	TRINITY_DN6973_c0_g1_i22	LIPA3_MOUSE	97.8	0
TRINITY_DN6659_c0_g1	TRINITY_DN6659_c0_g1_i8	CP062_MOUSE	97.2	0
TRINITY_DN5164_c0_g1	TRINITY_DN5164_c0_g1_i10	VPS50_RAT	97.2	0
TRINITY_DN184_c0_g1	TRINITY_DN184_c0_g1_i5	ZBED6_MOUSE	93.4	0
TRINITY_DN3430_c0_g1	TRINITY_DN3430_c0_g1_i1	AFF2_MOUSE	86.9	0
TRINITY_DN658_c0_g1	TRINITY_DN658_c0_g1_i8	UNC5B_MOUSE	94.5	0
TRINITY_DN4799_c1_g1	TRINITY_DN4799_c1_g1_i13	TIM_RAT	83.9	0
TRINITY_DN1585_c0_g1	TRINITY_DN1585_c0_g1_i1	ATP7B_MOUSE	92.1	0
TRINITY_DN1332_c2_g1	TRINITY_DN1332_c2_g1_i2	EXTL3_MOUSE	98.7	0
TRINITY_DN2459_c1_g1	TRINITY_DN2459_c1_g1_i7	LCAP_MOUSE	89.7	0
TRINITY_DN4311_c1_g1	TRINITY_DN4311_c1_g1_i1	NAA25_MOUSE	96.2	0
TRINITY_DN4128_c0_g2	TRINITY_DN4128_c0_g2_i1	PTPRJ_MOUSE	75	0
TRINITY_DN18282_c0_g1	TRINITY_DN18282_c0_g1_i8	ASXL2_MOUSE	81.8	0
TRINITY_DN394_c2_g1	TRINITY_DN394_c2_g1_i7	KANL1_MOUSE	94	0
TRINITY_DN872_c3_g1	TRINITY_DN872_c3_g1_i3	HDAC6_MOUSE	83.6	0
TRINITY_DN2114_c1_g1	TRINITY_DN2114_c1_g1_i8	DPP8_MOUSE	98.2	0
TRINITY_DN54855_c0_g1	TRINITY_DN54855_c0_g1_i6	ZRAB3_MOUSE	85.7	0
TRINITY_DN26601_c0_g1	TRINITY_DN26601_c0_g1_i3	DRP2_RAT	97.3	0
TRINITY_DN2011_c1_g3	TRINITY_DN2011_c1_g3_i6	VPS54_MOUSE	95.5	0
TRINITY_DN4200_c0_g1	TRINITY_DN4200_c0_g1_i20	MLH3_HUMAN	68.2	0
TRINITY_DN1267_c0_g1	TRINITY_DN1267_c0_g1_i5	PLD2_MOUSE	94	0
TRINITY_DN79747_c0_g1	TRINITY_DN79747_c0_g1_i1	T132B_HUMAN	86.8	0
TRINITY_DN7411_c0_g1	TRINITY_DN7411_c0_g1_i4	CAN15_MOUSE	93	0
TRINITY_DN55148_c0_g1	TRINITY_DN55148_c0_g1_i4	TNG6_MOUSE	87.1	0
TRINITY_DN1352_c1_g1	TRINITY_DN1352_c1_g1_i6	SLF2_MOUSE	76.7	0
TRINITY_DN3783_c0_g1	TRINITY_DN3783_c0_g1_i5	MICA3_MOUSE	98.5	0
TRINITY_DN3981_c1_g1	TRINITY_DN3981_c1_g1_i4	LATS2_MOUSE	90.3	0
TRINITY_DN970_c0_g1	TRINITY_DN970_c0_g1_i21	MCF2L_RAT	96.7	0
TRINITY_DN4139_c0_g1	TRINITY_DN4139_c0_g1_i25	MIO_MOUSE	99.5	0
TRINITY_DN2750_c0_g1	TRINITY_DN2750_c0_g1_i4	AT1A1_RAT	99.5	0
TRINITY_DN5360_c0_g1	TRINITY_DN5360_c0_g1_i17	CILP2_HUMAN	76.9	0
TRINITY_DN2882_c0_g1	TRINITY_DN2882_c0_g1_i13	UN13D_MOUSE	64.3	0
TRINITY_DN24850_c0_g1	TRINITY_DN24850_c0_g1_i4	NAC2_RAT	99	0
TRINITY_DN11107_c0_g1	TRINITY_DN11107_c0_g1_i11	CSKP_MOUSE	99.2	0
TRINITY_DN178_c0_g1	TRINITY_DN178_c0_g1_i2	PCDH7_HUMAN	97.6	0
TRINITY_DN3629_c0_g1	TRINITY_DN3629_c0_g1_i3	TET1_MOUSE	63.7	0
TRINITY_DN15645_c1_g5	TRINITY_DN15645_c1_g5_i1	YAIT_ECOLI	100	0
TRINITY_DN3469_c2_g1	TRINITY_DN3469_c2_g1_i1	NEK9_MOUSE	95.1	0
TRINITY_DN3951_c0_g1	TRINITY_DN3951_c0_g1_i9	MINK1_RAT	65.1	0
TRINITY_DN3196_c3_g1	TRINITY_DN3196_c3_g1_i3	LPPRC_MOUSE	82.6	0
TRINITY_DN14_c0_g1	TRINITY_DN14_c0_g1_i3	RENT1_MOUSE	98.8	0
TRINITY_DN5247_c0_g1	TRINITY_DN5247_c0_g1_i7	ZN646_HUMAN	62.1	0
TRINITY_DN5855_c0_g3	TRINITY_DN5855_c0_g3_i1	BAI1_MOUSE	98.8	0
TRINITY_DN2362_c0_g2	TRINITY_DN2362_c0_g2_i4	YLPM1_HUMAN	72.7	0
TRINITY_DN1781_c2_g1	TRINITY_DN1781_c2_g1_i1	UBN2_RAT	91.8	0
TRINITY_DN8249_c0_g1	TRINITY_DN8249_c0_g1_i22	PKHM1_MOUSE	89.9	0
TRINITY_DN1732_c0_g1	TRINITY_DN1732_c0_g1_i4	CI172_MOUSE	93.8	0
TRINITY_DN24313_c2_g1	TRINITY_DN24313_c2_g1_i7	DGKI_HUMAN	94.8	0
TRINITY_DN20809_c0_g1	TRINITY_DN20809_c0_g1_i10	OAS3_RAT	78.2	0
TRINITY_DN828_c1_g1	TRINITY_DN828_c1_g1_i5	PSD3_MOUSE	88.9	0
TRINITY_DN9470_c1_g2	TRINITY_DN9470_c1_g2_i12	PRD16_MOUSE	96.6	0
TRINITY_DN17917_c0_g4	TRINITY_DN17917_c0_g4_i1	ZN521_MOUSE	97.9	0
TRINITY_DN25957_c0_g3	TRINITY_DN25957_c0_g3_i1	ACNA_ECOLI	99.9	0
TRINITY_DN1217_c0_g1	TRINITY_DN1217_c0_g1_i15	XPO5_MOUSE	90.7	0
TRINITY_DN4800_c0_g4	TRINITY_DN4800_c0_g4_i3	ITA4_MOUSE	86	0
TRINITY_DN8265_c0_g1	TRINITY_DN8265_c0_g1_i24	FRPD2_HUMAN	73.1	0
TRINITY_DN4887_c3_g3	TRINITY_DN4887_c3_g3_i2	GRIA1_MOUSE	99	0
TRINITY_DN750_c0_g1	TRINITY_DN750_c0_g1_i1	NEK10_MOUSE	91.3	0
TRINITY_DN1856_c0_g1	TRINITY_DN1856_c0_g1_i20	TNPO2_HUMAN	99.9	0
TRINITY_DN20717_c0_g1	TRINITY_DN20717_c0_g1_i11	SYAM_RAT	91.8	0
TRINITY_DN5051_c2_g1	TRINITY_DN5051_c2_g1_i4	STAR8_MOUSE	92.7	0
TRINITY_DN2548_c0_g1	TRINITY_DN2548_c0_g1_i25	ACTN1_MOUSE	99.7	0
TRINITY_DN13987_c0_g1	TRINITY_DN13987_c0_g1_i10	ENPP2_MOUSE	96.9	0
TRINITY_DN9_c0_g1	TRINITY_DN9_c0_g1_i1	C1TC_MOUSE	96.1	0
TRINITY_DN1435_c0_g1	TRINITY_DN1435_c0_g1_i9	TYK2_MOUSE	61.9	0
TRINITY_DN5598_c1_g1	TRINITY_DN5598_c1_g1_i2	SLF1_MOUSE	84.9	0
TRINITY_DN12112_c0_g1	TRINITY_DN12112_c0_g1_i3	TCAF1_PONAB	92.2	0
TRINITY_DN12904_c0_g1	TRINITY_DN12904_c0_g1_i7	NAC3_RAT	98.1	0
TRINITY_DN2762_c1_g1	TRINITY_DN2762_c1_g1_i1	SP16H_MOUSE	99.5	0
TRINITY_DN3513_c1_g2	TRINITY_DN3513_c1_g2_i8	AASS_MOUSE	95.6	0
TRINITY_DN196_c0_g2	TRINITY_DN196_c0_g2_i6	MAST2_MOUSE	88	0
TRINITY_DN2368_c0_g2	TRINITY_DN2368_c0_g2_i8	ASPP2_MOUSE	90.9	0
TRINITY_DN12238_c0_g1	TRINITY_DN12238_c0_g1_i7	CNNM1_MOUSE	96.8	0
TRINITY_DN1458_c0_g1	TRINITY_DN1458_c0_g1_i1	PDE2A_RAT	95.8	0
TRINITY_DN618_c0_g1	TRINITY_DN618_c0_g1_i8	LIPA1_HUMAN	87.8	0
TRINITY_DN10894_c0_g1	TRINITY_DN10894_c0_g1_i18	SC24C_HUMAN	85.6	0
TRINITY_DN1986_c0_g1	TRINITY_DN1986_c0_g1_i19	AP3B2_MOUSE	98.7	0
TRINITY_DN15632_c0_g1	TRINITY_DN15632_c0_g1_i1	TRPA1_MOUSE	90.6	0
TRINITY_DN2867_c2_g1	TRINITY_DN2867_c2_g1_i3	TEX2_MOUSE	91.3	0
TRINITY_DN1125_c3_g1	TRINITY_DN1125_c3_g1_i6	RBM20_HUMAN	78.5	0
TRINITY_DN1798_c0_g2	TRINITY_DN1798_c0_g2_i2	CL16A_MOUSE	91.2	0
TRINITY_DN13408_c0_g4	TRINITY_DN13408_c0_g4_i1	PUTA_ECOLI	99.3	0
TRINITY_DN1409_c1_g1	TRINITY_DN1409_c1_g1_i9	ZEB2_HUMAN	97.3	0
TRINITY_DN7999_c0_g1	TRINITY_DN7999_c0_g1_i2	PDPR_MOUSE	97.8	0
TRINITY_DN2910_c0_g1	TRINITY_DN2910_c0_g1_i35	PLPL6_MOUSE	97.9	0
TRINITY_DN3388_c0_g1	TRINITY_DN3388_c0_g1_i7	P210L_MOUSE	87.9	0
TRINITY_DN5466_c0_g1	TRINITY_DN5466_c0_g1_i1	AL1L1_MOUSE	96.7	0
TRINITY_DN24759_c0_g1	TRINITY_DN24759_c0_g1_i2	ITIH2_MESAU	93.8	0
TRINITY_DN332_c1_g1	TRINITY_DN332_c1_g1_i8	TSH1_HUMAN	93.5	0
TRINITY_DN2275_c0_g1	TRINITY_DN2275_c0_g1_i5	MYO6_HUMAN	96.2	0
TRINITY_DN13022_c0_g1	TRINITY_DN13022_c0_g1_i2	ITSN1_MOUSE	94.8	0
TRINITY_DN9514_c0_g2	TRINITY_DN9514_c0_g2_i2	ROR2_MOUSE	96.4	0
TRINITY_DN1273_c2_g1	TRINITY_DN1273_c2_g1_i6	MYO1H_HUMAN	84.2	0
TRINITY_DN2077_c0_g1	TRINITY_DN2077_c0_g1_i18	RPGF3_RAT	95.1	0
TRINITY_DN4715_c2_g1	TRINITY_DN4715_c2_g1_i3	SRGP1_HUMAN	98	0
TRINITY_DN6062_c0_g1	TRINITY_DN6062_c0_g1_i1	PCDC2_HUMAN	92.2	0
TRINITY_DN3920_c1_g2	TRINITY_DN3920_c1_g2_i5	B4GN3_MOUSE	89.7	0
TRINITY_DN10076_c0_g1	TRINITY_DN10076_c0_g1_i6	KIF19_MOUSE	93.7	0
TRINITY_DN2561_c0_g1	TRINITY_DN2561_c0_g1_i21	FRM4B_MOUSE	96.7	0
TRINITY_DN1432_c0_g1	TRINITY_DN1432_c0_g1_i9	INT7_MOUSE	98	0
TRINITY_DN2874_c0_g1	TRINITY_DN2874_c0_g1_i4	PCSK5_RAT	97.5	0
TRINITY_DN438_c0_g1	TRINITY_DN438_c0_g1_i12	F214A_MOUSE	85.1	0
TRINITY_DN259_c0_g4	TRINITY_DN259_c0_g4_i1	F193A_MOUSE	92.7	0
TRINITY_DN79769_c0_g3	TRINITY_DN79769_c0_g3_i1	CSMD3_MOUSE	98.2	0
TRINITY_DN1347_c1_g1	TRINITY_DN1347_c1_g1_i7	MYO19_MOUSE	91.3	0
TRINITY_DN6499_c0_g1	TRINITY_DN6499_c0_g1_i17	UBP33_MOUSE	94.5	0
TRINITY_DN1765_c0_g1	TRINITY_DN1765_c0_g1_i1	AHI1_RAT	86.1	0
TRINITY_DN2011_c1_g1	TRINITY_DN2011_c1_g1_i9	SULF2_MOUSE	97.6	0
TRINITY_DN1978_c1_g2	TRINITY_DN1978_c1_g2_i2	TRPC6_MOUSE	96.7	0
TRINITY_DN7561_c0_g1	TRINITY_DN7561_c0_g1_i8	PALLD_MOUSE	90.6	0
TRINITY_DN405_c3_g1	TRINITY_DN405_c3_g1_i6	WDR90_MOUSE	82.2	0
TRINITY_DN4843_c0_g1	TRINITY_DN4843_c0_g1_i1	KPCD3_MOUSE	97.5	0
TRINITY_DN6373_c0_g1	TRINITY_DN6373_c0_g1_i3	ADA19_MOUSE	91.3	0
TRINITY_DN4831_c0_g1	TRINITY_DN4831_c0_g1_i7	HECW1_MOUSE	97.9	0
TRINITY_DN2279_c0_g1	TRINITY_DN2279_c0_g1_i4	MUC4_MOUSE	72.4	0
TRINITY_DN1904_c0_g1	TRINITY_DN1904_c0_g1_i13	ATS6_HUMAN	95.9	0
TRINITY_DN2361_c0_g1	TRINITY_DN2361_c0_g1_i3	ATS1_MOUSE	71	0
TRINITY_DN426_c0_g2	TRINITY_DN426_c0_g2_i8	AGO1_HUMAN	99.9	0
TRINITY_DN8600_c1_g1	TRINITY_DN8600_c1_g1_i4	C2TA_MOUSE	84.3	0
TRINITY_DN29479_c0_g2	TRINITY_DN29479_c0_g2_i5	C1TM_MOUSE	91.8	0
TRINITY_DN7159_c0_g1	TRINITY_DN7159_c0_g1_i31	DEN1A_MOUSE	89.8	0
TRINITY_DN11251_c0_g1	TRINITY_DN11251_c0_g1_i6	ACK1_MOUSE	69.2	0
TRINITY_DN3314_c0_g1	TRINITY_DN3314_c0_g1_i2	METH_RAT	92.9	0
TRINITY_DN5581_c0_g1	TRINITY_DN5581_c0_g1_i15	DAAM2_MOUSE	89.1	0
TRINITY_DN371_c0_g1	TRINITY_DN371_c0_g1_i3	RPGF1_HUMAN	88.7	0
TRINITY_DN3980_c0_g1	TRINITY_DN3980_c0_g1_i13	DDR1_RAT	95.1	0
TRINITY_DN426_c0_g1	TRINITY_DN426_c0_g1_i1	AGO2_MOUSE	99.5	0
TRINITY_DN1848_c0_g1	TRINITY_DN1848_c0_g1_i11	ITAX_MOUSE	78.9	0
TRINITY_DN9824_c0_g1	TRINITY_DN9824_c0_g1_i24	POL_XMRV6	56.7	0
TRINITY_DN336_c0_g1	TRINITY_DN336_c0_g1_i4	VINC_MOUSE	99.5	0
TRINITY_DN1420_c3_g1	TRINITY_DN1420_c3_g1_i1	TBCK_HUMAN	94.6	0
TRINITY_DN15557_c0_g1	TRINITY_DN15557_c0_g1_i8	ACOC_MOUSE	96.9	0
TRINITY_DN1875_c2_g1	TRINITY_DN1875_c2_g1_i6	SNPC4_MOUSE	76.8	0
TRINITY_DN49_c0_g1	TRINITY_DN49_c0_g1_i14	ZN687_MOUSE	86.1	0
TRINITY_DN909_c2_g1	TRINITY_DN909_c2_g1_i14	GOGB1_HUMAN	57.3	0
TRINITY_DN17917_c0_g1	TRINITY_DN17917_c0_g1_i1	ZN423_MOUSE	99.8	0
TRINITY_DN465_c3_g1	TRINITY_DN465_c3_g1_i1	DHTK1_RAT	93.4	0
TRINITY_DN1563_c2_g1	TRINITY_DN1563_c2_g1_i5	DSG2_MOUSE	83	0
TRINITY_DN2981_c0_g1	TRINITY_DN2981_c0_g1_i5	PCSK6_RAT	94.1	0
TRINITY_DN3432_c1_g1	TRINITY_DN3432_c1_g1_i13	CTND1_MOUSE	94.7	0
TRINITY_DN19737_c1_g1	TRINITY_DN19737_c1_g1_i2	KIBRA_MOUSE	94	0
TRINITY_DN1328_c4_g1	TRINITY_DN1328_c4_g1_i3	DEN2A_MOUSE	91.9	0
TRINITY_DN1467_c0_g1	TRINITY_DN1467_c0_g1_i5	ST5_HUMAN	75.8	0
TRINITY_DN705_c2_g1	TRINITY_DN705_c2_g1_i1	SLIT3_MOUSE	97.2	0
TRINITY_DN4128_c1_g3	TRINITY_DN4128_c1_g3_i2	PTPRT_HUMAN	99.1	0
TRINITY_DN923_c1_g1	TRINITY_DN923_c1_g1_i21	ROBO3_MOUSE	61.2	0
TRINITY_DN29452_c0_g1	TRINITY_DN29452_c0_g1_i1	YFHM_ECOLI	99.6	0
TRINITY_DN30136_c0_g11	TRINITY_DN30136_c0_g11_i1	KDPD_ECOLI	99.8	0
TRINITY_DN800_c2_g2	TRINITY_DN800_c2_g2_i16	DEN4B_MOUSE	97.8	0
TRINITY_DN3633_c0_g1	TRINITY_DN3633_c0_g1_i4	DHX36_MOUSE	95.6	0
TRINITY_DN1401_c0_g1	TRINITY_DN1401_c0_g1_i33	SHIP2_MOUSE	98.8	0
TRINITY_DN31649_c0_g1	TRINITY_DN31649_c0_g1_i2	TRPM5_MOUSE	89.4	0
TRINITY_DN1147_c0_g1	TRINITY_DN1147_c0_g1_i4	DPP9_MOUSE	96.6	0
TRINITY_DN10_c1_g1	TRINITY_DN10_c1_g1_i9	PTPRN_RAT	92.7	0
TRINITY_DN6980_c0_g1	TRINITY_DN6980_c0_g1_i3	DIAP3_MOUSE	86.3	0
TRINITY_DN1285_c0_g2	TRINITY_DN1285_c0_g2_i7	PKHG5_MOUSE	89.1	0
TRINITY_DN2579_c0_g1	TRINITY_DN2579_c0_g1_i17	ARHG2_HUMAN	93.4	0
TRINITY_DN96_c0_g1	TRINITY_DN96_c0_g1_i11	TNS2_MOUSE	48.3	0
TRINITY_DN1686_c0_g1	TRINITY_DN1686_c0_g1_i1	DGKZ_HUMAN	89.8	0
TRINITY_DN2606_c0_g1	TRINITY_DN2606_c0_g1_i4	AP1B1_MOUSE	97.8	0
TRINITY_DN259_c1_g1	TRINITY_DN259_c1_g1_i3	MERTK_MOUSE	86.8	0
TRINITY_DN1157_c0_g1	TRINITY_DN1157_c0_g1_i9	CUX2_MOUSE	61	0
TRINITY_DN6174_c0_g1	TRINITY_DN6174_c0_g1_i17	AL1L2_MOUSE	93.6	0
TRINITY_DN22152_c0_g1	TRINITY_DN22152_c0_g1_i3	K1024_MOUSE	95.9	0
TRINITY_DN488_c0_g1	TRINITY_DN488_c0_g1_i4	BICC1_HUMAN	93.5	0
TRINITY_DN824_c2_g1	TRINITY_DN824_c2_g1_i1	FPRP_MOUSE	96.5	0
TRINITY_DN42838_c0_g1	TRINITY_DN42838_c0_g1_i4	TEX15_MOUSE	68.4	0
TRINITY_DN508_c3_g1	TRINITY_DN508_c3_g1_i1	FNIP2_MOUSE	86.6	0
TRINITY_DN1974_c0_g1	TRINITY_DN1974_c0_g1_i20	COG1_MOUSE	90.6	0
TRINITY_DN3780_c0_g1	TRINITY_DN3780_c0_g1_i6	AMD_RAT	90.1	0
TRINITY_DN34008_c0_g2	TRINITY_DN34008_c0_g2_i14	PK1L2_MOUSE	78.7	0
TRINITY_DN4342_c2_g1	TRINITY_DN4342_c2_g1_i4	NLGN3_RAT	99.4	0
TRINITY_DN5221_c3_g1	TRINITY_DN5221_c3_g1_i9	NU107_HUMAN	94.4	0
TRINITY_DN5929_c0_g1	TRINITY_DN5929_c0_g1_i34	RUSC2_MOUSE	82.4	0
TRINITY_DN6858_c0_g1	TRINITY_DN6858_c0_g1_i4	SYLM_MOUSE	92.5	0
TRINITY_DN10288_c1_g1	TRINITY_DN10288_c1_g1_i12	KIF5A_HUMAN	97.6	0
TRINITY_DN2808_c0_g2	TRINITY_DN2808_c0_g2_i24	HECD3_MOUSE	98.4	0
TRINITY_DN59968_c0_g1	TRINITY_DN59968_c0_g1_i5	CDHR2_HUMAN	71.7	0
TRINITY_DN426_c1_g1	TRINITY_DN426_c1_g1_i9	SMRCD_MOUSE	91.9	0
TRINITY_DN1615_c0_g1	TRINITY_DN1615_c0_g1_i13	INT3_MOUSE	99.4	0
TRINITY_DN2709_c1_g1	TRINITY_DN2709_c1_g1_i7	VPS39_MOUSE	97.4	0
TRINITY_DN13460_c0_g1	TRINITY_DN13460_c0_g1_i10	SBP2L_MOUSE	88.1	0
TRINITY_DN17243_c0_g1	TRINITY_DN17243_c0_g1_i8	BOC_MOUSE	89.5	0
TRINITY_DN5740_c1_g2	TRINITY_DN5740_c1_g2_i1	EGFLA_RAT	83.9	0
TRINITY_DN918_c0_g1	TRINITY_DN918_c0_g1_i3	DNM3A_MOUSE	97.5	0
TRINITY_DN55881_c1_g2	TRINITY_DN55881_c1_g2_i2	GEMI4_HUMAN	80.9	0
TRINITY_DN665_c6_g1	TRINITY_DN665_c6_g1_i2	NAC1_HUMAN	91.2	0
TRINITY_DN2595_c0_g1	TRINITY_DN2595_c0_g1_i9	AT2C1_HUMAN	97.9	0
TRINITY_DN18540_c0_g1	TRINITY_DN18540_c0_g1_i14	UBP53_MOUSE	81.5	0
TRINITY_DN5368_c0_g2	TRINITY_DN5368_c0_g2_i3	OCRL_HUMAN	94.1	0
TRINITY_DN5368_c0_g3	TRINITY_DN5368_c0_g3_i5	OCRL_HUMAN	94.1	0
TRINITY_DN1966_c0_g1	TRINITY_DN1966_c0_g1_i17	TTF2_MOUSE	81.2	0
TRINITY_DN3259_c0_g1	TRINITY_DN3259_c0_g1_i1	PLCB2_RAT	72.2	0
TRINITY_DN3729_c0_g2	TRINITY_DN3729_c0_g2_i10	LAP2_MOUSE	91.4	0
TRINITY_DN6782_c0_g1	TRINITY_DN6782_c0_g1_i1	ZHX3_MOUSE	91.8	0
TRINITY_DN571_c0_g1	TRINITY_DN571_c0_g1_i7	MARH6_MOUSE	99.2	0
TRINITY_DN10954_c0_g1	TRINITY_DN10954_c0_g1_i1	MYO1A_MOUSE	88.8	0
TRINITY_DN9456_c1_g1	TRINITY_DN9456_c1_g1_i1	CDKL5_MOUSE	97.3	0
TRINITY_DN5783_c0_g1	TRINITY_DN5783_c0_g1_i4	ZBT21_HUMAN	85.5	0
TRINITY_DN20166_c0_g2	TRINITY_DN20166_c0_g2_i2	CMTA1_MOUSE	98.1	0
TRINITY_DN1899_c0_g1	TRINITY_DN1899_c0_g1_i6	KDM7A_MOUSE	94	0
TRINITY_DN1093_c4_g1	TRINITY_DN1093_c4_g1_i1	TF3C2_MOUSE	95.2	0
TRINITY_DN17249_c0_g1	TRINITY_DN17249_c0_g1_i3	TTC41_MOUSE	78.3	0
TRINITY_DN2126_c0_g1	TRINITY_DN2126_c0_g1_i20	HPS3_MOUSE	84.9	0
TRINITY_DN20941_c0_g3	TRINITY_DN20941_c0_g3_i5	SCN5A_MOUSE	96.9	0
TRINITY_DN438_c1_g1	TRINITY_DN438_c1_g1_i4	M3K9_MOUSE	91.6	0
TRINITY_DN420_c0_g1	TRINITY_DN420_c0_g1_i9	SMCA2_HUMAN	98.9	0
TRINITY_DN2256_c0_g1	TRINITY_DN2256_c0_g1_i14	UN45A_RAT	97.4	0
TRINITY_DN4630_c0_g1	TRINITY_DN4630_c0_g1_i6	PKHH1_MOUSE	88.4	0
TRINITY_DN6585_c0_g1	TRINITY_DN6585_c0_g1_i11	AP2A2_MOUSE	97.9	0
TRINITY_DN14247_c0_g2	TRINITY_DN14247_c0_g2_i9	DUSTY_MOUSE	94.7	0
TRINITY_DN7739_c0_g1	TRINITY_DN7739_c0_g1_i12	EF2_RAT	99.7	0
TRINITY_DN1294_c2_g1	TRINITY_DN1294_c2_g1_i8	PARG_MOUSE	88	0
TRINITY_DN2629_c0_g1	TRINITY_DN2629_c0_g1_i6	WASH7_MOUSE	98.3	0
TRINITY_DN383_c0_g1	TRINITY_DN383_c0_g1_i5	NDST2_MOUSE	96.3	0
TRINITY_DN1328_c3_g1	TRINITY_DN1328_c3_g1_i4	LARP1_MOUSE	95.9	0
TRINITY_DN403_c0_g1	TRINITY_DN403_c0_g1_i7	PIWL1_MOUSE	99.3	0
TRINITY_DN885_c1_g1	TRINITY_DN885_c1_g1_i17	SMRC2_HUMAN	92	0
TRINITY_DN3686_c3_g1	TRINITY_DN3686_c3_g1_i13	KANK1_HUMAN	83.6	0
TRINITY_DN11235_c0_g1	TRINITY_DN11235_c0_g1_i2	ADCY1_MOUSE	95.2	0
TRINITY_DN110237_c0_g1	TRINITY_DN110237_c0_g1_i3	TRPV4_MOUSE	98.3	0
TRINITY_DN183_c0_g1	TRINITY_DN183_c0_g1_i20	TEX10_MOUSE	94.8	0
TRINITY_DN23215_c0_g1	TRINITY_DN23215_c0_g1_i4	PPR26_MOUSE	79.1	0
TRINITY_DN2350_c3_g1	TRINITY_DN2350_c3_g1_i9	PTPRC_MOUSE	72.4	0
TRINITY_DN40375_c0_g1	TRINITY_DN40375_c0_g1_i5	PTPRO_MOUSE	91.2	0
TRINITY_DN2666_c0_g1	TRINITY_DN2666_c0_g1_i11	SC31A_MOUSE	93	0
TRINITY_DN9558_c0_g2	TRINITY_DN9558_c0_g2_i3	ZSWM5_MOUSE	99.1	0
TRINITY_DN105077_c0_g1	TRINITY_DN105077_c0_g1_i4	PTPR2_RAT	88.6	0
TRINITY_DN28089_c0_g1	TRINITY_DN28089_c0_g1_i1	ATS8_MOUSE	92.3	0
TRINITY_DN29348_c1_g1	TRINITY_DN29348_c1_g1_i4	SE6L2_MOUSE	97.2	0
TRINITY_DN38589_c0_g14	TRINITY_DN38589_c0_g14_i1	NAPA_ECOHS	99.9	0
TRINITY_DN80_c0_g1	TRINITY_DN80_c0_g1_i3	TMM94_MOUSE	88	0
TRINITY_DN2084_c1_g2	TRINITY_DN2084_c1_g2_i18	NFAC3_MOUSE	91	0
TRINITY_DN12682_c0_g1	TRINITY_DN12682_c0_g1_i2	ECT2_MOUSE	94.6	0
TRINITY_DN1714_c1_g2	TRINITY_DN1714_c1_g2_i1	FA83B_MOUSE	85.4	0
TRINITY_DN546_c4_g1	TRINITY_DN546_c4_g1_i1	DAAM1_MOUSE	98.1	0
TRINITY_DN7487_c0_g1	TRINITY_DN7487_c0_g1_i3	GRIK2_RAT	99.8	0
TRINITY_DN40361_c0_g2	TRINITY_DN40361_c0_g2_i1	MDTB_ECO8A	99.9	0
TRINITY_DN19438_c0_g15	TRINITY_DN19438_c0_g15_i1	OPGH_ECO57	100	0
TRINITY_DN3922_c1_g1	TRINITY_DN3922_c1_g1_i6	XYLT2_MOUSE	96.8	0
TRINITY_DN1332_c0_g1	TRINITY_DN1332_c0_g1_i9	PUM1_MOUSE	98.6	0
TRINITY_DN2994_c2_g1	TRINITY_DN2994_c2_g1_i4	TRI33_MOUSE	96.8	0
TRINITY_DN197_c1_g1	TRINITY_DN197_c1_g1_i1	LPIN1_MOUSE	92.9	0
TRINITY_DN2638_c0_g1	TRINITY_DN2638_c0_g1_i10	M4K3_MOUSE	96.9	0
TRINITY_DN4788_c1_g1	TRINITY_DN4788_c1_g1_i11	MSH2_MOUSE	93.7	0
TRINITY_DN55748_c0_g1	TRINITY_DN55748_c0_g1_i4	SNX19_MOUSE	87.9	0
TRINITY_DN2722_c0_g1	TRINITY_DN2722_c0_g1_i21	DHX16_PANTR	94.4	0
TRINITY_DN6399_c0_g1	TRINITY_DN6399_c0_g1_i9	CAR10_MOUSE	93.2	0
TRINITY_DN332_c1_g3	TRINITY_DN332_c1_g3_i1	TSH2_MOUSE	89.3	0
TRINITY_DN1670_c2_g1	TRINITY_DN1670_c2_g1_i2	CADH2_MOUSE	99	0
TRINITY_DN1004_c0_g1	TRINITY_DN1004_c0_g1_i23	PEX6_RAT	89.9	0
TRINITY_DN6284_c0_g2	TRINITY_DN6284_c0_g2_i15	AUXI_MOUSE	96.2	0
TRINITY_DN4544_c0_g1	TRINITY_DN4544_c0_g1_i3	EXOC2_MOUSE	98.2	0
TRINITY_DN5884_c0_g1	TRINITY_DN5884_c0_g1_i21	T132A_MOUSE	66.6	0
TRINITY_DN2320_c0_g1	TRINITY_DN2320_c0_g1_i8	GCP6_HUMAN	62.9	0
TRINITY_DN11747_c0_g1	TRINITY_DN11747_c0_g1_i8	VWA3B_HUMAN	73.4	0
TRINITY_DN530_c1_g2	TRINITY_DN530_c1_g2_i12	ERAP1_MOUSE	91	0
TRINITY_DN2212_c0_g1	TRINITY_DN2212_c0_g1_i4	SARDH_MOUSE	93.1	0
TRINITY_DN45554_c2_g1	TRINITY_DN45554_c2_g1_i4	STK31_MOUSE	93.1	0
TRINITY_DN35762_c0_g1	TRINITY_DN35762_c0_g1_i2	SRCRL_MOUSE	77.2	0
TRINITY_DN1747_c0_g1	TRINITY_DN1747_c0_g1_i5	IMB1_MOUSE	99.9	0
TRINITY_DN2896_c0_g1	TRINITY_DN2896_c0_g1_i11	MED23_RAT	99	0
TRINITY_DN69_c2_g1	TRINITY_DN69_c2_g1_i2	PYGB_MOUSE	98.9	0
TRINITY_DN7552_c0_g1	TRINITY_DN7552_c0_g1_i2	FYCO1_MOUSE	81.6	0
TRINITY_DN55169_c0_g1	TRINITY_DN55169_c0_g1_i7	PYGM_MOUSE	99.2	0
TRINITY_DN5382_c0_g1	TRINITY_DN5382_c0_g1_i14	SULF1_RAT	95.6	0
TRINITY_DN3803_c0_g1	TRINITY_DN3803_c0_g1_i1	KS6C1_MOUSE	83.5	0
TRINITY_DN4137_c1_g1	TRINITY_DN4137_c1_g1_i5	SYF1_RAT	98.9	0
TRINITY_DN7149_c4_g1	TRINITY_DN7149_c4_g1_i3	UBP13_MOUSE	96.1	0
TRINITY_DN88010_c0_g5	TRINITY_DN88010_c0_g5_i1	YHDP_ECOLI	98.6	0
TRINITY_DN1574_c0_g1	TRINITY_DN1574_c0_g1_i14	PCDGK_PANTR	92.4	0
TRINITY_DN5856_c0_g2	TRINITY_DN5856_c0_g2_i11	CFA57_MOUSE	91	0
TRINITY_DN6476_c0_g2	TRINITY_DN6476_c0_g2_i6	PK3C3_RAT	99.1	0
TRINITY_DN901_c0_g2	TRINITY_DN901_c0_g2_i2	SYGP1_MOUSE	91.3	0
TRINITY_DN3529_c0_g1	TRINITY_DN3529_c0_g1_i15	CORO7_MOUSE	91.2	0
TRINITY_DN3630_c0_g2	TRINITY_DN3630_c0_g2_i7	UBP8_MOUSE	91.8	0
TRINITY_DN1852_c2_g1	TRINITY_DN1852_c2_g1_i1	S12A1_RAT	97.5	0
TRINITY_DN4092_c0_g1	TRINITY_DN4092_c0_g1_i8	GT2D1_MOUSE	92.2	0
TRINITY_DN791_c0_g1	TRINITY_DN791_c0_g1_i24	ABR_MOUSE	99.5	0
TRINITY_DN5454_c1_g1	TRINITY_DN5454_c1_g1_i8	E2AK3_RAT	88.6	0
TRINITY_DN11241_c2_g1	TRINITY_DN11241_c2_g1_i5	HMDH_MESAU	97.2	0
TRINITY_DN0_c1_g1	TRINITY_DN0_c1_g1_i5	SUGP2_MOUSE	90.2	0
TRINITY_DN33383_c0_g1	TRINITY_DN33383_c0_g1_i4	BNC1_MOUSE	93.2	0
TRINITY_DN2183_c1_g1	TRINITY_DN2183_c1_g1_i5	NLRX1_RAT	91	0
TRINITY_DN73997_c0_g1	TRINITY_DN73997_c0_g1_i4	ERC6L_MOUSE	78.1	0
TRINITY_DN3901_c1_g1	TRINITY_DN3901_c1_g1_i6	SRBD1_MOUSE	85.4	0
TRINITY_DN4155_c0_g1	TRINITY_DN4155_c0_g1_i12	PKHA5_HUMAN	83.2	0
TRINITY_DN665_c1_g2	TRINITY_DN665_c1_g2_i1	BAHC1_MOUSE	90.6	0
TRINITY_DN3159_c0_g1	TRINITY_DN3159_c0_g1_i5	GCP3_MOUSE	97.5	0
TRINITY_DN13406_c2_g1	TRINITY_DN13406_c2_g1_i1	DLG2_HUMAN	98.2	0
TRINITY_DN16067_c0_g1	TRINITY_DN16067_c0_g1_i2	CTNA1_HUMAN	99.4	0
TRINITY_DN2272_c0_g1	TRINITY_DN2272_c0_g1_i8	NRDE2_MOUSE	85.9	0
TRINITY_DN3465_c0_g1	TRINITY_DN3465_c0_g1_i4	PDE8B_HUMAN	94.1	0
TRINITY_DN7613_c0_g2	TRINITY_DN7613_c0_g2_i4	FIG4_MOUSE	95.5	0
TRINITY_DN18119_c0_g1	TRINITY_DN18119_c0_g1_i10	SC24D_HUMAN	85	0
TRINITY_DN45013_c0_g2	TRINITY_DN45013_c0_g2_i1	CTNA2_PONAB	99.9	0
TRINITY_DN927_c0_g1	TRINITY_DN927_c0_g1_i5	KDM4B_MOUSE	87.5	0
TRINITY_DN4084_c0_g2	TRINITY_DN4084_c0_g2_i8	TXD11_MOUSE	93	0
TRINITY_DN15049_c0_g1	TRINITY_DN15049_c0_g1_i4	IFIH1_MOUSE	85.5	0
TRINITY_DN43622_c0_g7	TRINITY_DN43622_c0_g7_i1	TORS_ECOLI	99.8	0
TRINITY_DN6805_c0_g2	TRINITY_DN6805_c0_g2_i10	INT6_MOUSE	89.5	0
TRINITY_DN5410_c1_g1	TRINITY_DN5410_c1_g1_i5	UBP35_HUMAN	89.6	0
TRINITY_DN2737_c5_g1	TRINITY_DN2737_c5_g1_i1	KDM2A_MOUSE	98.3	0
TRINITY_DN246_c0_g1	TRINITY_DN246_c0_g1_i9	AEGP_MOUSE	63.5	0
TRINITY_DN2176_c0_g1	TRINITY_DN2176_c0_g1_i6	VAV3_MOUSE	96.8	0
TRINITY_DN5096_c0_g2	TRINITY_DN5096_c0_g2_i10	HELQ_MOUSE	81.8	0
TRINITY_DN3598_c3_g1	TRINITY_DN3598_c3_g1_i5	MCM9_MOUSE	78.1	0
TRINITY_DN74852_c0_g1	TRINITY_DN74852_c0_g1_i1	WDR72_HUMAN	75.2	0
TRINITY_DN3288_c0_g1	TRINITY_DN3288_c0_g1_i4	ROBO4_MOUSE	84	0
TRINITY_DN2021_c1_g2	TRINITY_DN2021_c1_g2_i5	AP3B1_HUMAN	93.1	0
TRINITY_DN563_c0_g1	TRINITY_DN563_c0_g1_i4	DDR2_MOUSE	97.2	0
TRINITY_DN4483_c0_g1	TRINITY_DN4483_c0_g1_i5	DNLI4_MOUSE	90	0
TRINITY_DN15164_c0_g1	TRINITY_DN15164_c0_g1_i2	CSTN2_MOUSE	97.4	0
TRINITY_DN10184_c0_g1	TRINITY_DN10184_c0_g1_i5	PRGC2_RAT	90.1	0
TRINITY_DN312_c0_g1	TRINITY_DN312_c0_g1_i2	FGD1_MOUSE	98.1	0
TRINITY_DN671_c1_g2	TRINITY_DN671_c1_g2_i6	COPG2_MOUSE	98	0
TRINITY_DN24389_c0_g2	TRINITY_DN24389_c0_g2_i1	TDRD5_MOUSE	83.4	0
TRINITY_DN422_c0_g1	TRINITY_DN422_c0_g1_i16	UBP15_BOVIN	77.2	0
TRINITY_DN1960_c0_g1	TRINITY_DN1960_c0_g1_i5	M4K5_HUMAN	96.3	0
TRINITY_DN8541_c0_g1	TRINITY_DN8541_c0_g1_i6	WDR47_MOUSE	97	0
TRINITY_DN615_c0_g1	TRINITY_DN615_c0_g1_i27	ATG9A_RAT	99.6	0
TRINITY_DN3213_c1_g1	TRINITY_DN3213_c1_g1_i7	LYAG_RAT	73.6	0
TRINITY_DN182_c0_g1	TRINITY_DN182_c0_g1_i22	PLPL7_MOUSE	89.1	0
TRINITY_DN1246_c2_g1	TRINITY_DN1246_c2_g1_i4	ZNRF3_MOUSE	95.7	0
TRINITY_DN2992_c0_g1	TRINITY_DN2992_c0_g1_i5	OSBL5_MOUSE	95.3	0
TRINITY_DN8937_c0_g1	TRINITY_DN8937_c0_g1_i1	CORIN_MOUSE	87.3	0
TRINITY_DN43711_c0_g1	TRINITY_DN43711_c0_g1_i1	YRAJ_ECOLI	99.6	0
TRINITY_DN167_c1_g1	TRINITY_DN167_c1_g1_i7	EXOC1_MOUSE	97.5	0
TRINITY_DN6733_c0_g1	TRINITY_DN6733_c0_g1_i1	FMNL1_MOUSE	92.1	0
TRINITY_DN39018_c1_g1	TRINITY_DN39018_c1_g1_i2	TRI37_MOUSE	94.9	0
TRINITY_DN1639_c1_g1	TRINITY_DN1639_c1_g1_i5	OSBL1_RAT	93.5	0
TRINITY_DN7425_c0_g1	TRINITY_DN7425_c0_g1_i16	HIRA_MOUSE	95.5	0
TRINITY_DN31_c0_g1	TRINITY_DN31_c0_g1_i1	SMC3_HUMAN	94	0
TRINITY_DN2168_c4_g1	TRINITY_DN2168_c4_g1_i10	NISCH_RAT	93.7	0
TRINITY_DN2341_c2_g1	TRINITY_DN2341_c2_g1_i2	ZN618_HUMAN	92.8	0
TRINITY_DN3642_c1_g1	TRINITY_DN3642_c1_g1_i7	KPCD2_MOUSE	96.9	0
TRINITY_DN6806_c0_g1	TRINITY_DN6806_c0_g1_i1	VPS41_MOUSE	97.9	0
TRINITY_DN867_c1_g1	TRINITY_DN867_c1_g1_i1	S12A7_RAT	97.7	0
TRINITY_DN14682_c0_g1	TRINITY_DN14682_c0_g1_i1	SPON1_RAT	98.3	0
TRINITY_DN1088_c3_g1	TRINITY_DN1088_c3_g1_i2	GPTC8_MOUSE	90.8	0
TRINITY_DN180_c0_g2	TRINITY_DN180_c0_g2_i5	CTR9_MOUSE	100	0
TRINITY_DN71782_c0_g1	TRINITY_DN71782_c0_g1_i4	AT2B2_RAT	99.3	0
TRINITY_DN45476_c0_g1	TRINITY_DN45476_c0_g1_i1	KPCD1_HUMAN	93.9	0
TRINITY_DN2905_c0_g1	TRINITY_DN2905_c0_g1_i5	CHRD_MOUSE	92	0
TRINITY_DN3857_c0_g1	TRINITY_DN3857_c0_g1_i2	ZN827_MOUSE	94.5	0
TRINITY_DN4535_c1_g2	TRINITY_DN4535_c1_g2_i18	DLGP1_MOUSE	94.4	0
TRINITY_DN1531_c0_g1	TRINITY_DN1531_c0_g1_i13	SIN3B_MOUSE	86.1	0
TRINITY_DN2069_c0_g1	TRINITY_DN2069_c0_g1_i2	XYLT1_MOUSE	94.8	0
TRINITY_DN4172_c1_g1	TRINITY_DN4172_c1_g1_i1	NEDD4_MOUSE	91.4	0
TRINITY_DN1218_c0_g1	TRINITY_DN1218_c0_g1_i2	UACA_MOUSE	84.7	0
TRINITY_DN50438_c0_g1	TRINITY_DN50438_c0_g1_i2	MUC2_MOUSE	81.3	0
TRINITY_DN1846_c0_g1	TRINITY_DN1846_c0_g1_i7	RASA3_MOUSE	98.1	0
TRINITY_DN60697_c0_g2	TRINITY_DN60697_c0_g2_i3	CADH4_MOUSE	95.9	0
TRINITY_DN1335_c0_g1	TRINITY_DN1335_c0_g1_i9	EMC1_MOUSE	62.3	0
TRINITY_DN2394_c0_g1	TRINITY_DN2394_c0_g1_i1	HERC4_MOUSE	58.6	0
TRINITY_DN1061_c0_g2	TRINITY_DN1061_c0_g2_i1	ATS5_MOUSE	93.3	0
TRINITY_DN4877_c0_g1	TRINITY_DN4877_c0_g1_i28	ZN236_HUMAN	86	0
TRINITY_DN6395_c0_g1	TRINITY_DN6395_c0_g1_i12	LIMC1_MOUSE	89	0
TRINITY_DN6952_c0_g1	TRINITY_DN6952_c0_g1_i18	MTUS2_MOUSE	79.9	0
TRINITY_DN11469_c0_g1	TRINITY_DN11469_c0_g1_i7	ADA12_MOUSE	91.6	0
TRINITY_DN5158_c0_g1	TRINITY_DN5158_c0_g1_i3	XPF_CRIGR	92.7	0
TRINITY_DN2479_c0_g1	TRINITY_DN2479_c0_g1_i3	PWP2_MOUSE	93.9	0
TRINITY_DN6110_c0_g1	TRINITY_DN6110_c0_g1_i8	BCAS3_HUMAN	95.7	0
TRINITY_DN8100_c0_g2	TRINITY_DN8100_c0_g2_i1	M3K13_MOUSE	87.9	0
TRINITY_DN3291_c2_g1	TRINITY_DN3291_c2_g1_i2	SYNE3_MOUSE	89.5	0
TRINITY_DN1204_c0_g1	TRINITY_DN1204_c0_g1_i4	SENP6_MOUSE	86.4	0
TRINITY_DN28_c0_g2	TRINITY_DN28_c0_g2_i11	UBP36_MOUSE	75.1	0
TRINITY_DN2387_c0_g1	TRINITY_DN2387_c0_g1_i4	PRIC2_MOUSE	97.9	0
TRINITY_DN1128_c0_g4	TRINITY_DN1128_c0_g4_i3	ZN451_MOUSE	81.4	0
TRINITY_DN1517_c0_g2	TRINITY_DN1517_c0_g2_i2	SHRM4_MOUSE	79	0
TRINITY_DN6291_c1_g1	TRINITY_DN6291_c1_g1_i1	ASAP2_HUMAN	88.4	0
TRINITY_DN592_c0_g1	TRINITY_DN592_c0_g1_i7	UFO_MOUSE	91.2	0
TRINITY_DN2435_c0_g1	TRINITY_DN2435_c0_g1_i7	ANR26_MOUSE	68.7	0
TRINITY_DN264_c3_g1	TRINITY_DN264_c3_g1_i2	TGFA1_MOUSE	95.2	0
TRINITY_DN312_c2_g1	TRINITY_DN312_c2_g1_i13	EHMT2_MOUSE	69.3	0
TRINITY_DN4710_c2_g1	TRINITY_DN4710_c2_g1_i3	AGAP1_MOUSE	99.1	0
TRINITY_DN11273_c0_g1	TRINITY_DN11273_c0_g1_i4	SMBP2_RAT	88.3	0
TRINITY_DN4477_c0_g1	TRINITY_DN4477_c0_g1_i16	VAV2_MOUSE	94.6	0
TRINITY_DN2240_c4_g1	TRINITY_DN2240_c4_g1_i4	ADA17_RAT	97.2	0
TRINITY_DN2660_c0_g1	TRINITY_DN2660_c0_g1_i2	GANC_MOUSE	86.6	0
TRINITY_DN9396_c0_g1	TRINITY_DN9396_c0_g1_i5	CBL_MOUSE	95.4	0
TRINITY_DN5803_c0_g1	TRINITY_DN5803_c0_g1_i3	CTF18_MOUSE	87.5	0
TRINITY_DN10906_c0_g2	TRINITY_DN10906_c0_g2_i11	FBLN2_MOUSE	90.4	0
TRINITY_DN18293_c0_g12	TRINITY_DN18293_c0_g12_i1	XYLS_ECOLI	99.9	0
TRINITY_DN1777_c3_g1	TRINITY_DN1777_c3_g1_i3	ZC12C_MOUSE	96.4	0
TRINITY_DN7105_c1_g1	TRINITY_DN7105_c1_g1_i7	PLK4_MOUSE	90.4	0
TRINITY_DN4147_c0_g1	TRINITY_DN4147_c0_g1_i9	PSA_HUMAN	98.8	0
TRINITY_DN12287_c0_g1	TRINITY_DN12287_c0_g1_i9	RB_MOUSE	96	0
TRINITY_DN15053_c0_g1	TRINITY_DN15053_c0_g1_i3	CO6_RAT	82.2	0
TRINITY_DN415_c0_g1	TRINITY_DN415_c0_g1_i19	NEMF_MOUSE	93	0
TRINITY_DN4304_c0_g1	TRINITY_DN4304_c0_g1_i1	MED16_MOUSE	98.2	0
TRINITY_DN307_c0_g1	TRINITY_DN307_c0_g1_i21	FRM4A_MOUSE	95.8	0
TRINITY_DN15222_c0_g1	TRINITY_DN15222_c0_g1_i4	K1107_MOUSE	67.9	0
TRINITY_DN11658_c0_g1	TRINITY_DN11658_c0_g1_i9	LST2_MOUSE	92.7	0
TRINITY_DN87_c0_g1	TRINITY_DN87_c0_g1_i3	CLCN6_MOUSE	97.7	0
TRINITY_DN710_c0_g1	TRINITY_DN710_c0_g1_i21	MOR2A_MOUSE	93.1	0
TRINITY_DN4291_c0_g1	TRINITY_DN4291_c0_g1_i5	UBP37_HUMAN	91.5	0
TRINITY_DN58430_c0_g1	TRINITY_DN58430_c0_g1_i4	PDE5A_MOUSE	95.5	0
TRINITY_DN3425_c0_g1	TRINITY_DN3425_c0_g1_i4	AT2C2_MOUSE	93.9	0
TRINITY_DN9149_c0_g1	TRINITY_DN9149_c0_g1_i14	ANS1A_MOUSE	90.9	0
TRINITY_DN27101_c0_g7	TRINITY_DN27101_c0_g7_i1	YQIG_ECOLI	99.9	0
TRINITY_DN2665_c0_g3	TRINITY_DN2665_c0_g3_i2	ITIH5_MOUSE	85.9	0
TRINITY_DN8387_c0_g1	TRINITY_DN8387_c0_g1_i6	PHRF1_RAT	85.4	0
TRINITY_DN287_c1_g1	TRINITY_DN287_c1_g1_i7	COPB_MOUSE	99.9	0
TRINITY_DN2117_c1_g1	TRINITY_DN2117_c1_g1_i4	TFP11_RAT	97.8	0
TRINITY_DN4253_c1_g1	TRINITY_DN4253_c1_g1_i2	PRD10_MOUSE	90.7	0
TRINITY_DN522_c0_g1	TRINITY_DN522_c0_g1_i21	COPA_MOUSE	99.1	0
TRINITY_DN3252_c0_g1	TRINITY_DN3252_c0_g1_i18	GLI1_MOUSE	87.4	0
TRINITY_DN2884_c0_g1	TRINITY_DN2884_c0_g1_i17	EHBP1_MOUSE	78.6	0
TRINITY_DN7967_c0_g5	TRINITY_DN7967_c0_g5_i1	PCDGL_HUMAN	98.1	0
TRINITY_DN2176_c0_g2	TRINITY_DN2176_c0_g2_i3	VAV_MOUSE	96.9	0
TRINITY_DN488_c1_g1	TRINITY_DN488_c1_g1_i3	Z3H7B_HUMAN	64.4	0
TRINITY_DN10387_c0_g1	TRINITY_DN10387_c0_g1_i25	OSBL3_HUMAN	91.2	0
TRINITY_DN67_c0_g1	TRINITY_DN67_c0_g1_i12	ITA7_RAT	92	0
TRINITY_DN5250_c0_g1	TRINITY_DN5250_c0_g1_i17	ANPRB_RAT	67.5	0
TRINITY_DN5332_c0_g1	TRINITY_DN5332_c0_g1_i4	PTHB1_MOUSE	91.5	0
TRINITY_DN17643_c0_g1	TRINITY_DN17643_c0_g1_i1	STON2_MOUSE	91.5	0
TRINITY_DN2019_c0_g1	TRINITY_DN2019_c0_g1_i18	IPO5_HUMAN	65.7	0
TRINITY_DN7073_c2_g1	TRINITY_DN7073_c2_g1_i4	DGKB_MOUSE	97.8	0
TRINITY_DN10500_c0_g2	TRINITY_DN10500_c0_g2_i6	CLSPN_MOUSE	77.1	0
TRINITY_DN1131_c0_g1	TRINITY_DN1131_c0_g1_i20	TENX_HUMAN	81.4	0
TRINITY_DN4482_c1_g1	TRINITY_DN4482_c1_g1_i10	GSCR1_HUMAN	63.7	0
TRINITY_DN2269_c0_g1	TRINITY_DN2269_c0_g1_i5	SPAT5_MOUSE	94.3	0
TRINITY_DN1901_c1_g1	TRINITY_DN1901_c1_g1_i2	NAA15_MOUSE	99.2	0
TRINITY_DN4098_c0_g1	TRINITY_DN4098_c0_g1_i4	AMER1_MOUSE	85	0
TRINITY_DN4271_c0_g1	TRINITY_DN4271_c0_g1_i26	BAG6_MOUSE	92.9	0
TRINITY_DN2893_c0_g1	TRINITY_DN2893_c0_g1_i7	M4K2_MOUSE	97.6	0
TRINITY_DN3127_c0_g1	TRINITY_DN3127_c0_g1_i20	CFA74_MOUSE	79.5	0
TRINITY_DN169_c1_g1	TRINITY_DN169_c1_g1_i10	WDR36_HUMAN	89.6	0
TRINITY_DN2723_c0_g1	TRINITY_DN2723_c0_g1_i9	ITIH3_MOUSE	90.1	0
TRINITY_DN53832_c0_g7	TRINITY_DN53832_c0_g7_i1	SYA_ECODH	99.9	0
TRINITY_DN8877_c0_g2	TRINITY_DN8877_c0_g2_i13	S23IP_HUMAN	85.9	0
TRINITY_DN4333_c1_g1	TRINITY_DN4333_c1_g1_i9	F91A1_MOUSE	96.4	0
TRINITY_DN760_c0_g1	TRINITY_DN760_c0_g1_i18	SCRIB_MOUSE	58.9	0
TRINITY_DN4936_c0_g2	TRINITY_DN4936_c0_g2_i10	TPP2_MOUSE	56.5	0
TRINITY_DN27245_c0_g1	TRINITY_DN27245_c0_g1_i4	RHSB_ECOLI	88.1	0
TRINITY_DN129_c0_g1	TRINITY_DN129_c0_g1_i15	GCP2_MOUSE	96.6	0
TRINITY_DN6470_c1_g1	TRINITY_DN6470_c1_g1_i13	DHX37_HUMAN	84.5	0
TRINITY_DN1538_c1_g1	TRINITY_DN1538_c1_g1_i5	RBM33_MOUSE	92.9	0
TRINITY_DN21517_c0_g1	TRINITY_DN21517_c0_g1_i3	PCD15_MOUSE	96.6	0
TRINITY_DN1952_c0_g1	TRINITY_DN1952_c0_g1_i37	S12A9_RAT	97.4	0
TRINITY_DN4239_c4_g1	TRINITY_DN4239_c4_g1_i10	CAN7_HUMAN	96.2	0
TRINITY_DN6941_c0_g1	TRINITY_DN6941_c0_g1_i6	DLG1_HUMAN	92.4	0
TRINITY_DN810_c0_g1	TRINITY_DN810_c0_g1_i6	WDR66_HUMAN	79.3	0
TRINITY_DN4478_c0_g1	TRINITY_DN4478_c0_g1_i8	ITA10_HUMAN	87.6	0
TRINITY_DN775_c0_g3	TRINITY_DN775_c0_g3_i4	VPP1_MOUSE	96.4	0
TRINITY_DN885_c0_g2	TRINITY_DN885_c0_g2_i11	ADA22_MOUSE	87.7	0
TRINITY_DN3338_c0_g1	TRINITY_DN3338_c0_g1_i6	URGCP_MOUSE	93.6	0
TRINITY_DN1723_c0_g1	TRINITY_DN1723_c0_g1_i9	VPP2_MOUSE	95	0
TRINITY_DN2030_c0_g1	TRINITY_DN2030_c0_g1_i11	SORT_MOUSE	93.1	0
TRINITY_DN989_c1_g1	TRINITY_DN989_c1_g1_i10	LONM_RAT	89.6	0
TRINITY_DN1017_c0_g2	TRINITY_DN1017_c0_g2_i19	AUTS2_HUMAN	85.5	0
TRINITY_DN7322_c0_g1	TRINITY_DN7322_c0_g1_i21	CLCN3_MOUSE	98.4	0
TRINITY_DN1439_c0_g1	TRINITY_DN1439_c0_g1_i17	KAL1L_MOUSE	84.6	0
TRINITY_DN2411_c0_g1	TRINITY_DN2411_c0_g1_i1	FA65C_MOUSE	89.2	0
TRINITY_DN423_c0_g1	TRINITY_DN423_c0_g1_i5	HIP1_MOUSE	92.8	0
TRINITY_DN1369_c0_g2	TRINITY_DN1369_c0_g2_i9	AREL1_MOUSE	95.7	0
TRINITY_DN12076_c1_g1	TRINITY_DN12076_c1_g1_i2	CE120_HUMAN	90.6	0
TRINITY_DN23578_c0_g1	TRINITY_DN23578_c0_g1_i9	NFASC_HUMAN	92.7	0
TRINITY_DN310_c0_g1	TRINITY_DN310_c0_g1_i9	RON_MOUSE	59.4	0
TRINITY_DN1183_c0_g1	TRINITY_DN1183_c0_g1_i8	AGRD1_MOUSE	92	0
TRINITY_DN3105_c1_g2	TRINITY_DN3105_c1_g2_i5	ZN142_HUMAN	80	0
TRINITY_DN27439_c0_g2	TRINITY_DN27439_c0_g2_i11	SMC1B_MOUSE	79	0
TRINITY_DN36822_c0_g1	TRINITY_DN36822_c0_g1_i1	PTFX1_ECOLI	99.6	0
TRINITY_DN893_c0_g1	TRINITY_DN893_c0_g1_i5	VWA3A_MOUSE	55.7	0
TRINITY_DN1730_c0_g1	TRINITY_DN1730_c0_g1_i6	WDR24_MOUSE	98.6	0
TRINITY_DN1978_c1_g1	TRINITY_DN1978_c1_g1_i1	TRPC3_RAT	98.9	0
TRINITY_DN4309_c0_g1	TRINITY_DN4309_c0_g1_i27	IF4G2_MOUSE	98.5	0
TRINITY_DN2089_c0_g1	TRINITY_DN2089_c0_g1_i1	MYH14_MOUSE	88.4	0
TRINITY_DN4663_c0_g1	TRINITY_DN4663_c0_g1_i3	MCM2_MOUSE	97.7	0
TRINITY_DN6464_c0_g1	TRINITY_DN6464_c0_g1_i5	M3K10_MOUSE	94	0
TRINITY_DN6902_c0_g1	TRINITY_DN6902_c0_g1_i4	ATS12_MOUSE	84.6	0
TRINITY_DN4113_c0_g1	TRINITY_DN4113_c0_g1_i1	WWC2_MOUSE	84.1	0
TRINITY_DN5493_c0_g1	TRINITY_DN5493_c0_g1_i2	SYDE2_HUMAN	71	0
TRINITY_DN1551_c0_g1	TRINITY_DN1551_c0_g1_i2	AKA12_RAT	67.3	0
TRINITY_DN2623_c0_g1	TRINITY_DN2623_c0_g1_i6	DDX46_MOUSE	98	0
TRINITY_DN269_c0_g1	TRINITY_DN269_c0_g1_i17	ZMIZ1_MOUSE	97.9	0
TRINITY_DN8791_c0_g2	TRINITY_DN8791_c0_g2_i12	OBSCN_MOUSE	74.7	0
TRINITY_DN37780_c0_g1	TRINITY_DN37780_c0_g1_i3	FSTL4_MOUSE	92.9	0
TRINITY_DN9339_c0_g1	TRINITY_DN9339_c0_g1_i13	DI3L2_MOUSE	92.7	0
TRINITY_DN21188_c0_g2	TRINITY_DN21188_c0_g2_i11	ZFYV1_MOUSE	98.2	0
TRINITY_DN20077_c1_g2	TRINITY_DN20077_c1_g2_i2	PSMD1_PONAB	99.5	0
TRINITY_DN1908_c0_g1	TRINITY_DN1908_c0_g1_i3	PKHA6_MOUSE	78.9	0
TRINITY_DN1835_c0_g1	TRINITY_DN1835_c0_g1_i17	RBBP6_MOUSE	85.4	0
TRINITY_DN2036_c0_g1	TRINITY_DN2036_c0_g1_i5	AMPN_RAT	79.4	0
TRINITY_DN3156_c0_g3	TRINITY_DN3156_c0_g3_i14	CSDE1_MOUSE	99.7	0
TRINITY_DN45013_c0_g1	TRINITY_DN45013_c0_g1_i4	CTNA3_MOUSE	94.7	0
TRINITY_DN341_c0_g1	TRINITY_DN341_c0_g1_i29	NSD3_MOUSE	90.1	0
TRINITY_DN538_c1_g2	TRINITY_DN538_c1_g2_i2	NLRC4_RAT	79.7	0
TRINITY_DN47891_c0_g2	TRINITY_DN47891_c0_g2_i15	RASL3_MOUSE	80.9	0
TRINITY_DN2300_c1_g1	TRINITY_DN2300_c1_g1_i4	DJC10_MOUSE	95.3	0
TRINITY_DN27807_c0_g1	TRINITY_DN27807_c0_g1_i3	NFAC2_MOUSE	92.1	0
TRINITY_DN91_c0_g1	TRINITY_DN91_c0_g1_i2	F16A2_MOUSE	97.4	0
TRINITY_DN52347_c0_g17	TRINITY_DN52347_c0_g17_i1	YDDB_ECOLI	99.6	0
TRINITY_DN11320_c0_g1	TRINITY_DN11320_c0_g1_i4	RHG39_MOUSE	96.4	0
TRINITY_DN25323_c0_g1	TRINITY_DN25323_c0_g1_i7	SEM4D_MOUSE	92.2	0
TRINITY_DN5842_c0_g1	TRINITY_DN5842_c0_g1_i18	PGCB_RAT	90.3	0
TRINITY_DN107106_c0_g3	TRINITY_DN107106_c0_g3_i2	CMYA5_MOUSE	70.8	0
TRINITY_DN14085_c0_g1	TRINITY_DN14085_c0_g1_i1	BUB1_MOUSE	80.7	0
TRINITY_DN2163_c0_g1	TRINITY_DN2163_c0_g1_i20	UNC5A_HUMAN	96.5	0
TRINITY_DN23798_c0_g1	TRINITY_DN23798_c0_g1_i11	MCR_MOUSE	93.5	0
TRINITY_DN3484_c0_g1	TRINITY_DN3484_c0_g1_i19	PGAP1_MOUSE	86.3	0
TRINITY_DN3467_c2_g1	TRINITY_DN3467_c2_g1_i1	TACC2_HUMAN	48.8	0
TRINITY_DN112_c0_g1	TRINITY_DN112_c0_g1_i14	IQEC1_MOUSE	99.2	0
TRINITY_DN8072_c0_g1	TRINITY_DN8072_c0_g1_i15	STOX2_MOUSE	97.5	0
TRINITY_DN4515_c0_g1	TRINITY_DN4515_c0_g1_i5	ABTB2_MOUSE	97.1	0
TRINITY_DN4907_c0_g1	TRINITY_DN4907_c0_g1_i17	BRE1B_MOUSE	96.6	0
TRINITY_DN401_c0_g1	TRINITY_DN401_c0_g1_i8	RHG42_HUMAN	96.7	0
TRINITY_DN52835_c0_g1	TRINITY_DN52835_c0_g1_i1	SEM3A_RAT	97.9	0
TRINITY_DN14618_c0_g1	TRINITY_DN14618_c0_g1_i1	BUB1B_MOUSE	79.3	0
TRINITY_DN4934_c1_g1	TRINITY_DN4934_c1_g1_i2	LOXL2_RAT	95.5	0
TRINITY_DN6150_c1_g1	TRINITY_DN6150_c1_g1_i1	MTP_MESAU	92.4	0
TRINITY_DN1172_c0_g3	TRINITY_DN1172_c0_g3_i1	SLIT2_MOUSE	97.9	0
TRINITY_DN2253_c0_g1	TRINITY_DN2253_c0_g1_i4	DIAP2_HUMAN	88.1	0
TRINITY_DN13_c0_g1	TRINITY_DN13_c0_g1_i5	LEPR_MOUSE	84.7	0
TRINITY_DN2457_c0_g1	TRINITY_DN2457_c0_g1_i2	ZMYM6_HUMAN	63.2	0
TRINITY_DN4808_c0_g1	TRINITY_DN4808_c0_g1_i1	FAM21_CRIGR	83.5	0
TRINITY_DN588_c0_g1	TRINITY_DN588_c0_g1_i1	MICA1_MOUSE	74.1	0
TRINITY_DN1017_c1_g2	TRINITY_DN1017_c1_g2_i4	LONP2_RAT	96.9	0
TRINITY_DN5057_c1_g2	TRINITY_DN5057_c1_g2_i9	AGO4_HUMAN	66.8	0
TRINITY_DN10917_c0_g1	TRINITY_DN10917_c0_g1_i6	TERA_HUMAN	100	0
TRINITY_DN74107_c2_g1	TRINITY_DN74107_c2_g1_i1	AK1H_ECOLI	99.6	0
TRINITY_DN2288_c1_g1	TRINITY_DN2288_c1_g1_i15	ARI4A_HUMAN	83.2	0
TRINITY_DN2863_c0_g1	TRINITY_DN2863_c0_g1_i36	S4A11_MOUSE	93.6	0
TRINITY_DN2586_c1_g1	TRINITY_DN2586_c1_g1_i3	VPS53_MOUSE	98.7	0
TRINITY_DN2640_c6_g1	TRINITY_DN2640_c6_g1_i1	BEND3_MOUSE	95.3	0
TRINITY_DN7944_c0_g1	TRINITY_DN7944_c0_g1_i13	NUP93_MOUSE	99	0
TRINITY_DN19963_c0_g1	TRINITY_DN19963_c0_g1_i1	TLR7_MOUSE	79.2	0
TRINITY_DN697_c0_g1	TRINITY_DN697_c0_g1_i33	RECQ5_MOUSE	83.5	0
TRINITY_DN45_c0_g1	TRINITY_DN45_c0_g1_i4	DDX58_MOUSE	85.5	0
TRINITY_DN4637_c0_g2	TRINITY_DN4637_c0_g2_i10	F16A1_MOUSE	84	0
TRINITY_DN5030_c0_g1	TRINITY_DN5030_c0_g1_i2	ACON_MOUSE	99.1	0
TRINITY_DN1465_c0_g1	TRINITY_DN1465_c0_g1_i11	NFRKB_MOUSE	70.1	0
TRINITY_DN29452_c0_g2	TRINITY_DN29452_c0_g2_i1	PBPC_ECOLI	99.9	0
TRINITY_DN4276_c0_g1	TRINITY_DN4276_c0_g1_i6	PP6R3_HUMAN	96	0
TRINITY_DN12874_c0_g1	TRINITY_DN12874_c0_g1_i1	INP4B_RAT	88.9	0
TRINITY_DN2635_c0_g1	TRINITY_DN2635_c0_g1_i26	CFA43_HUMAN	76.3	0
TRINITY_DN12012_c0_g4	TRINITY_DN12012_c0_g4_i2	ICE2_MOUSE	84.9	0
TRINITY_DN619_c1_g1	TRINITY_DN619_c1_g1_i2	MIB1_MOUSE	99.4	0
TRINITY_DN959_c0_g1	TRINITY_DN959_c0_g1_i6	DGKD_HUMAN	94.5	0
TRINITY_DN5438_c0_g1	TRINITY_DN5438_c0_g1_i1	SPEF2_RAT	76.7	0
TRINITY_DN7624_c0_g2	TRINITY_DN7624_c0_g2_i8	ERMP1_RAT	88.7	0
TRINITY_DN10784_c0_g1	TRINITY_DN10784_c0_g1_i6	RIR1_MOUSE	98.7	0
TRINITY_DN6597_c0_g1	TRINITY_DN6597_c0_g1_i5	EFR3A_MOUSE	97.9	0
TRINITY_DN17532_c0_g3	TRINITY_DN17532_c0_g3_i12	CC171_MOUSE	87	0
TRINITY_DN3956_c0_g1	TRINITY_DN3956_c0_g1_i6	SPTN5_HUMAN	56.8	0
TRINITY_DN8985_c1_g1	TRINITY_DN8985_c1_g1_i3	EXC6B_MOUSE	99.5	0
TRINITY_DN7985_c0_g1	TRINITY_DN7985_c0_g1_i4	NOTC3_RAT	91.3	0
TRINITY_DN3936_c0_g1	TRINITY_DN3936_c0_g1_i12	MYO1B_HUMAN	48	0
TRINITY_DN3190_c0_g1	TRINITY_DN3190_c0_g1_i2	TARB1_HUMAN	49.8	0
TRINITY_DN6914_c0_g1	TRINITY_DN6914_c0_g1_i1	WFS1_MOUSE	94.8	0
TRINITY_DN234_c1_g1	TRINITY_DN234_c1_g1_i1	KCNB1_MOUSE	96.8	0
TRINITY_DN5831_c1_g1	TRINITY_DN5831_c1_g1_i6	PIGN_MOUSE	87.3	0
TRINITY_DN16606_c0_g2	TRINITY_DN16606_c0_g2_i1	PHF20_HUMAN	71.1	0
TRINITY_DN3690_c0_g1	TRINITY_DN3690_c0_g1_i1	VILI_MOUSE	93.6	0
TRINITY_DN5258_c0_g1	TRINITY_DN5258_c0_g1_i3	HYOU1_CRIGR	94	0
TRINITY_DN6010_c0_g1	TRINITY_DN6010_c0_g1_i24	PKHM2_MOUSE	90.8	0
TRINITY_DN3046_c0_g1	TRINITY_DN3046_c0_g1_i7	EMAL1_RAT	97.9	0
TRINITY_DN5177_c2_g1	TRINITY_DN5177_c2_g1_i2	NCAM1_MOUSE	98.3	0
TRINITY_DN1328_c0_g1	TRINITY_DN1328_c0_g1_i1	SH3R1_RAT	94.1	0
TRINITY_DN67859_c0_g1	TRINITY_DN67859_c0_g1_i1	CHSS1_MOUSE	97.1	0
TRINITY_DN660_c3_g1	TRINITY_DN660_c3_g1_i4	PP6R2_MOUSE	91.5	0
TRINITY_DN3878_c0_g1	TRINITY_DN3878_c0_g1_i4	NU153_RAT	79.8	0
TRINITY_DN3143_c2_g1	TRINITY_DN3143_c2_g1_i3	TTLL7_MOUSE	87.7	0
TRINITY_DN21060_c0_g1	TRINITY_DN21060_c0_g1_i15	ITAE_MOUSE	80.4	0
TRINITY_DN2958_c0_g1	TRINITY_DN2958_c0_g1_i2	SMC4_MICAR	96.5	0
TRINITY_DN302_c0_g1	TRINITY_DN302_c0_g1_i2	PHLD_RAT	90	0
TRINITY_DN2492_c2_g3	TRINITY_DN2492_c2_g3_i1	Z518B_MOUSE	77.5	0
TRINITY_DN4875_c1_g1	TRINITY_DN4875_c1_g1_i16	CNNM2_MOUSE	95.8	0
TRINITY_DN13193_c0_g1	TRINITY_DN13193_c0_g1_i4	S3TC1_HUMAN	72	0
TRINITY_DN2226_c1_g2	TRINITY_DN2226_c1_g2_i5	AGAP2_RAT	65.7	0
TRINITY_DN958_c0_g2	TRINITY_DN958_c0_g2_i2	TF3C4_MOUSE	94.6	0
TRINITY_DN3328_c0_g1	TRINITY_DN3328_c0_g1_i27	WDR90_MOUSE	86.6	0
TRINITY_DN41_c0_g2	TRINITY_DN41_c0_g2_i5	DMBT1_MOUSE	53.4	0
TRINITY_DN1725_c0_g1	TRINITY_DN1725_c0_g1_i9	PKN3_MOUSE	91.5	0
TRINITY_DN76279_c0_g1	TRINITY_DN76279_c0_g1_i5	KCNQ5_MOUSE	96.5	0
TRINITY_DN6701_c0_g1	TRINITY_DN6701_c0_g1_i10	OSBP2_MOUSE	89.9	0
TRINITY_DN641_c0_g1	TRINITY_DN641_c0_g1_i6	M3K12_MOUSE	98.4	0
TRINITY_DN6903_c0_g10	TRINITY_DN6903_c0_g10_i1	PPSA_ECOLI	99.7	0
TRINITY_DN1886_c0_g1	TRINITY_DN1886_c0_g1_i13	AGRG2_RAT	88.3	0
TRINITY_DN874_c2_g1	TRINITY_DN874_c2_g1_i2	R3HD1_HUMAN	81.3	0
TRINITY_DN8449_c0_g1	TRINITY_DN8449_c0_g1_i10	AKAP9_HUMAN	46.9	0
TRINITY_DN148_c0_g1	TRINITY_DN148_c0_g1_i1	LAMA1_MOUSE	62.1	0
TRINITY_DN2241_c4_g1	TRINITY_DN2241_c4_g1_i2	TTC7A_MOUSE	93.5	0
TRINITY_DN15384_c0_g1	TRINITY_DN15384_c0_g1_i3	HS74L_MOUSE	95.4	0
TRINITY_DN17252_c1_g1	TRINITY_DN17252_c1_g1_i2	GRIA3_HUMAN	99.2	0
TRINITY_DN527_c1_g1	TRINITY_DN527_c1_g1_i6	E41L1_RAT	95.9	0
TRINITY_DN4301_c0_g3	TRINITY_DN4301_c0_g3_i1	MCM6_MOUSE	97.3	0
TRINITY_DN42339_c0_g1	TRINITY_DN42339_c0_g1_i1	DSC3_MOUSE	88.2	0
TRINITY_DN7267_c0_g2	TRINITY_DN7267_c0_g2_i3	AMPE_RAT	82	0
TRINITY_DN572_c0_g1	TRINITY_DN572_c0_g1_i1	RUBIC_MOUSE	89.5	0
TRINITY_DN2667_c1_g1	TRINITY_DN2667_c1_g1_i5	TAOK2_MOUSE	98.3	0
TRINITY_DN52347_c0_g12	TRINITY_DN52347_c0_g12_i1	DOSP_ECOLI	99.5	0
TRINITY_DN3587_c0_g1	TRINITY_DN3587_c0_g1_i12	NOL8_MOUSE	75.2	0
TRINITY_DN2277_c0_g1	TRINITY_DN2277_c0_g1_i17	CRML_MOUSE	89.7	0
TRINITY_DN823_c0_g1	TRINITY_DN823_c0_g1_i5	BRNP2_MOUSE	97.8	0
TRINITY_DN626_c0_g1	TRINITY_DN626_c0_g1_i16	PKN1_MOUSE	69.4	0
TRINITY_DN4797_c0_g1	TRINITY_DN4797_c0_g1_i6	PI3R5_MOUSE	90.8	0
TRINITY_DN1572_c0_g1	TRINITY_DN1572_c0_g1_i4	PACS1_MOUSE	99.5	0
TRINITY_DN4426_c0_g1	TRINITY_DN4426_c0_g1_i14	OSBL8_HUMAN	97.4	0
TRINITY_DN8098_c0_g1	TRINITY_DN8098_c0_g1_i6	MCTP2_MOUSE	93.1	0
TRINITY_DN8718_c0_g1	TRINITY_DN8718_c0_g1_i2	RASA2_RAT	92.6	0
TRINITY_DN226_c0_g1	TRINITY_DN226_c0_g1_i15	LTBP3_HUMAN	87.9	0
TRINITY_DN1194_c0_g2	TRINITY_DN1194_c0_g2_i2	PER3_MOUSE	74.2	0
TRINITY_DN2008_c0_g1	TRINITY_DN2008_c0_g1_i5	KPB2_MOUSE	95.1	0
TRINITY_DN8135_c1_g1	TRINITY_DN8135_c1_g1_i7	SC16B_RAT	76.6	0
TRINITY_DN18391_c0_g1	TRINITY_DN18391_c0_g1_i1	M3K14_MOUSE	88.9	0
TRINITY_DN21330_c0_g2	TRINITY_DN21330_c0_g2_i6	IGSF2_MOUSE	78	0
TRINITY_DN5369_c0_g1	TRINITY_DN5369_c0_g1_i11	CE104_MOUSE	89.6	0
TRINITY_DN10419_c0_g1	TRINITY_DN10419_c0_g1_i1	BRNP1_MOUSE	99.7	0
TRINITY_DN114433_c0_g1	TRINITY_DN114433_c0_g1_i3	MRFL_MOUSE	85.5	0
TRINITY_DN3357_c1_g2	TRINITY_DN3357_c1_g2_i10	NLGN2_RAT	98.6	0
TRINITY_DN2409_c0_g1	TRINITY_DN2409_c0_g1_i3	ABCB6_MOUSE	93.8	0
TRINITY_DN5286_c0_g1	TRINITY_DN5286_c0_g1_i1	FLIP1_RAT	92.9	0
TRINITY_DN5767_c0_g1	TRINITY_DN5767_c0_g1_i2	CAN3_RAT	92.6	0
TRINITY_DN14834_c0_g1	TRINITY_DN14834_c0_g1_i8	MUC6_MOUSE	60.9	0
TRINITY_DN271_c0_g3	TRINITY_DN271_c0_g3_i2	AT1A3_MOUSE	99.9	0
TRINITY_DN548_c1_g1	TRINITY_DN548_c1_g1_i2	SCAF8_MOUSE	95.7	0
TRINITY_DN12475_c0_g1	TRINITY_DN12475_c0_g1_i8	SEM4G_MOUSE	95	0
TRINITY_DN39308_c0_g1	TRINITY_DN39308_c0_g1_i1	GARE1_MOUSE	91.6	0
TRINITY_DN4175_c1_g1	TRINITY_DN4175_c1_g1_i11	CBLB_MOUSE	96.4	0
TRINITY_DN180_c0_g1	TRINITY_DN180_c0_g1_i9	COG3_MOUSE	97	0
TRINITY_DN3471_c0_g1	TRINITY_DN3471_c0_g1_i4	KIF4A_HUMAN	78.6	0
TRINITY_DN20_c0_g2	TRINITY_DN20_c0_g2_i9	PFKAM_MOUSE	99.2	0
TRINITY_DN5325_c0_g1	TRINITY_DN5325_c0_g1_i11	UBP11_MOUSE	77.8	0
TRINITY_DN9117_c0_g1	TRINITY_DN9117_c0_g1_i5	TTC7B_HUMAN	96.9	0
TRINITY_DN4412_c1_g2	TRINITY_DN4412_c1_g2_i5	DHX40_RAT	99	0
TRINITY_DN4264_c0_g1	TRINITY_DN4264_c0_g1_i4	FER_RAT	97.1	0
TRINITY_DN1095_c0_g1	TRINITY_DN1095_c0_g1_i7	FP100_MOUSE	88.2	0
TRINITY_DN5740_c1_g1	TRINITY_DN5740_c1_g1_i9	EPAS1_MOUSE	89.6	0
TRINITY_DN589_c0_g1	TRINITY_DN589_c0_g1_i4	PACS2_HUMAN	93.8	0
TRINITY_DN15138_c1_g1	TRINITY_DN15138_c1_g1_i4	FAN1_MOUSE	79.9	0
TRINITY_DN520_c3_g3	TRINITY_DN520_c3_g3_i1	UBE3A_MOUSE	92.2	0
TRINITY_DN1946_c0_g1	TRINITY_DN1946_c0_g1_i4	OSBL7_HUMAN	91.6	0
TRINITY_DN515_c0_g1	TRINITY_DN515_c0_g1_i13	CMTA2_MOUSE	88.6	0
TRINITY_DN2789_c0_g1	TRINITY_DN2789_c0_g1_i11	AVIL_MOUSE	91.6	0
TRINITY_DN1870_c1_g1	TRINITY_DN1870_c1_g1_i4	SLIT1_RAT	98.6	0
TRINITY_DN1468_c0_g1	TRINITY_DN1468_c0_g1_i3	DAPK1_MOUSE	97.9	0
TRINITY_DN2970_c0_g1	TRINITY_DN2970_c0_g1_i1	FCHO1_MOUSE	91	0
TRINITY_DN10326_c0_g1	TRINITY_DN10326_c0_g1_i4	SYCC_MOUSE	96.8	0
TRINITY_DN3132_c0_g1	TRINITY_DN3132_c0_g1_i6	SP130_MOUSE	90.1	0
TRINITY_DN9452_c0_g1	TRINITY_DN9452_c0_g1_i4	DPP6_RAT	96.1	0
TRINITY_DN8185_c0_g2	TRINITY_DN8185_c0_g2_i9	WWP1_MOUSE	92.7	0
TRINITY_DN11923_c1_g1	TRINITY_DN11923_c1_g1_i3	SEM3D_MOUSE	95.6	0
TRINITY_DN850_c0_g1	TRINITY_DN850_c0_g1_i2	ECE1_MOUSE	97.3	0
TRINITY_DN1234_c0_g1	TRINITY_DN1234_c0_g1_i9	WDR44_MOUSE	91.7	0
TRINITY_DN2861_c0_g1	TRINITY_DN2861_c0_g1_i2	IFT80_RAT	97	0
TRINITY_DN2326_c1_g1	TRINITY_DN2326_c1_g1_i7	FBH1_MOUSE	53.5	0
TRINITY_DN5387_c0_g1	TRINITY_DN5387_c0_g1_i6	GP155_HUMAN	90.2	0
TRINITY_DN136_c1_g1	TRINITY_DN136_c1_g1_i2	S38AA_RAT	81.2	0
TRINITY_DN6242_c0_g1	TRINITY_DN6242_c0_g1_i39	LOXL3_MOUSE	95.2	0
TRINITY_DN11062_c0_g1	TRINITY_DN11062_c0_g1_i3	MUC5B_HUMAN	75.6	0
TRINITY_DN25030_c0_g5	TRINITY_DN25030_c0_g5_i1	PBPA_ECOLI	99.7	0
TRINITY_DN116441_c0_g2	TRINITY_DN116441_c0_g2_i2	T132E_MOUSE	82.6	0
TRINITY_DN1044_c0_g1	TRINITY_DN1044_c0_g1_i7	TSP1_MOUSE	95.6	0
TRINITY_DN4240_c0_g1	TRINITY_DN4240_c0_g1_i6	JADE3_MOUSE	93	0
TRINITY_DN420_c0_g2	TRINITY_DN420_c0_g2_i5	SMCA4_BOVIN	99.8	0
TRINITY_DN1355_c0_g1	TRINITY_DN1355_c0_g1_i8	ANKL2_MOUSE	81.9	0
TRINITY_DN8033_c1_g1	TRINITY_DN8033_c1_g1_i4	F1711_PONAB	92.3	0
TRINITY_DN8831_c1_g1	TRINITY_DN8831_c1_g1_i2	DGKG_MOUSE	93.7	0
TRINITY_DN18872_c0_g1	TRINITY_DN18872_c0_g1_i3	MCM8_MOUSE	93.8	0
TRINITY_DN3169_c3_g1	TRINITY_DN3169_c3_g1_i2	PALB2_MOUSE	75	0
TRINITY_DN447_c0_g1	TRINITY_DN447_c0_g1_i5	DYN1_MOUSE	99.7	0
TRINITY_DN2606_c1_g1	TRINITY_DN2606_c1_g1_i14	PHLB1_MOUSE	89.2	0
TRINITY_DN26579_c0_g1	TRINITY_DN26579_c0_g1_i5	SEM3E_MOUSE	94.2	0
TRINITY_DN77032_c0_g1	TRINITY_DN77032_c0_g1_i4	SC23A_MOUSE	99.7	0
TRINITY_DN4343_c1_g2	TRINITY_DN4343_c1_g2_i1	MKLN1_RAT	99.5	0
TRINITY_DN3819_c0_g1	TRINITY_DN3819_c0_g1_i17	SC31B_HUMAN	75.6	0
[truncated: 42,513 more rows]
